# Supplementary material
Source: PubMed Central journal article supplement (PMC6548619)
Supplement: NIHMS1526911-supplement-1.pdf [file NIHMS1526911-supplement-1.pdf]

# Supplementary Figure 1

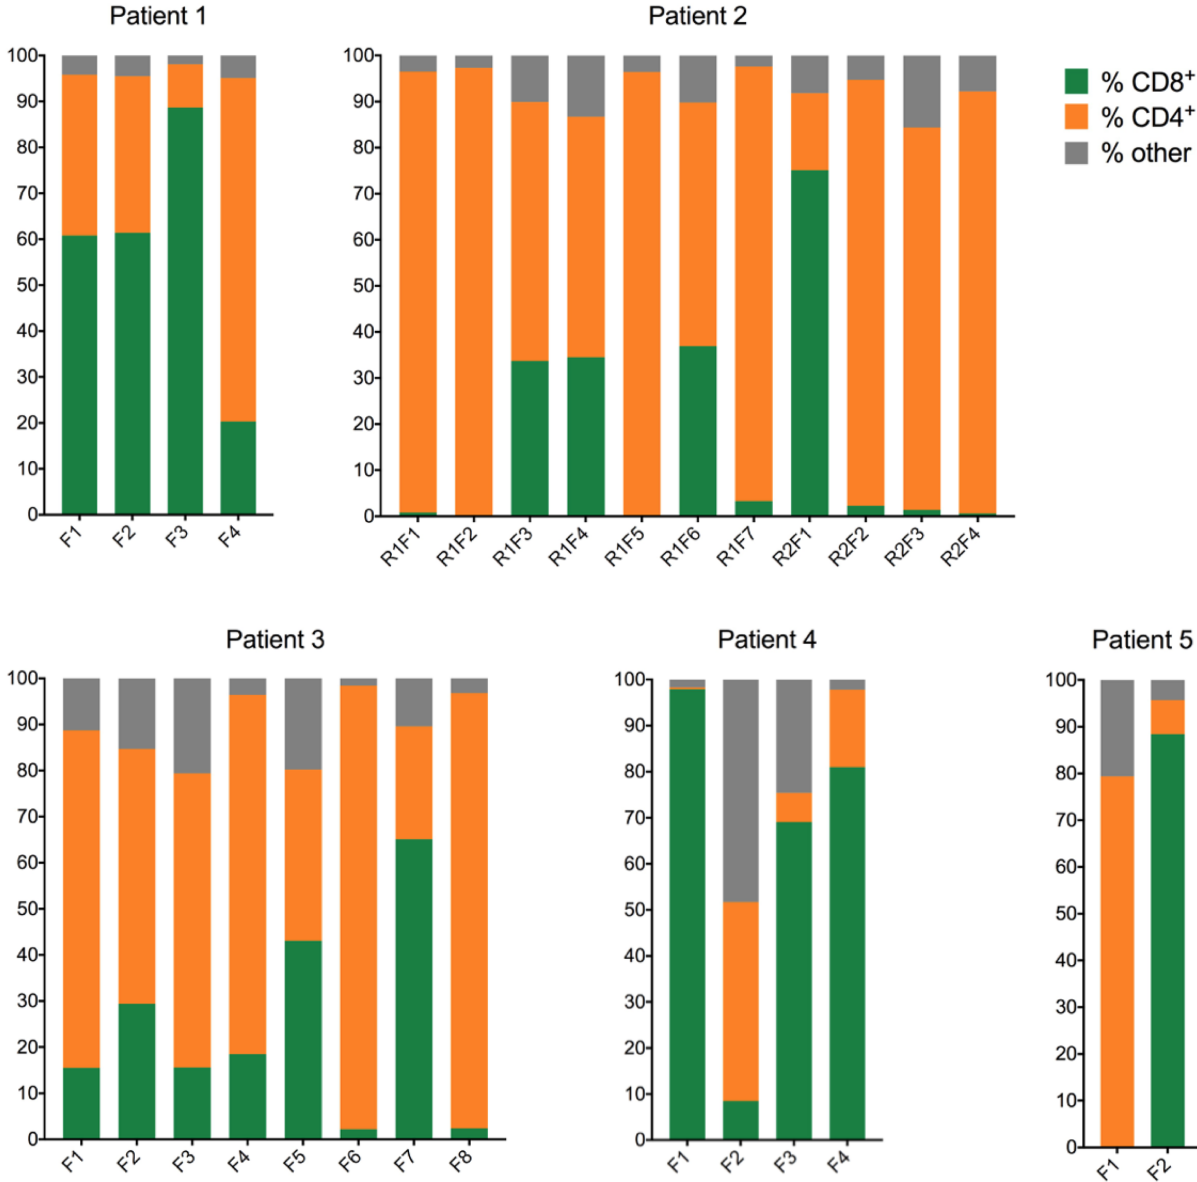

**Supplementary Figure 1.** The data was gated on live CD3<sup>+</sup> cells. Bar graphs represent the proportions of CD8<sup>+</sup> and CD4<sup>+</sup> cells (y axis) in each of the TIL cultures (x axis). The category “others” includes CD56<sup>+</sup> NKT cells and other uncharacterized cell types.

## Supplementary Figure 2

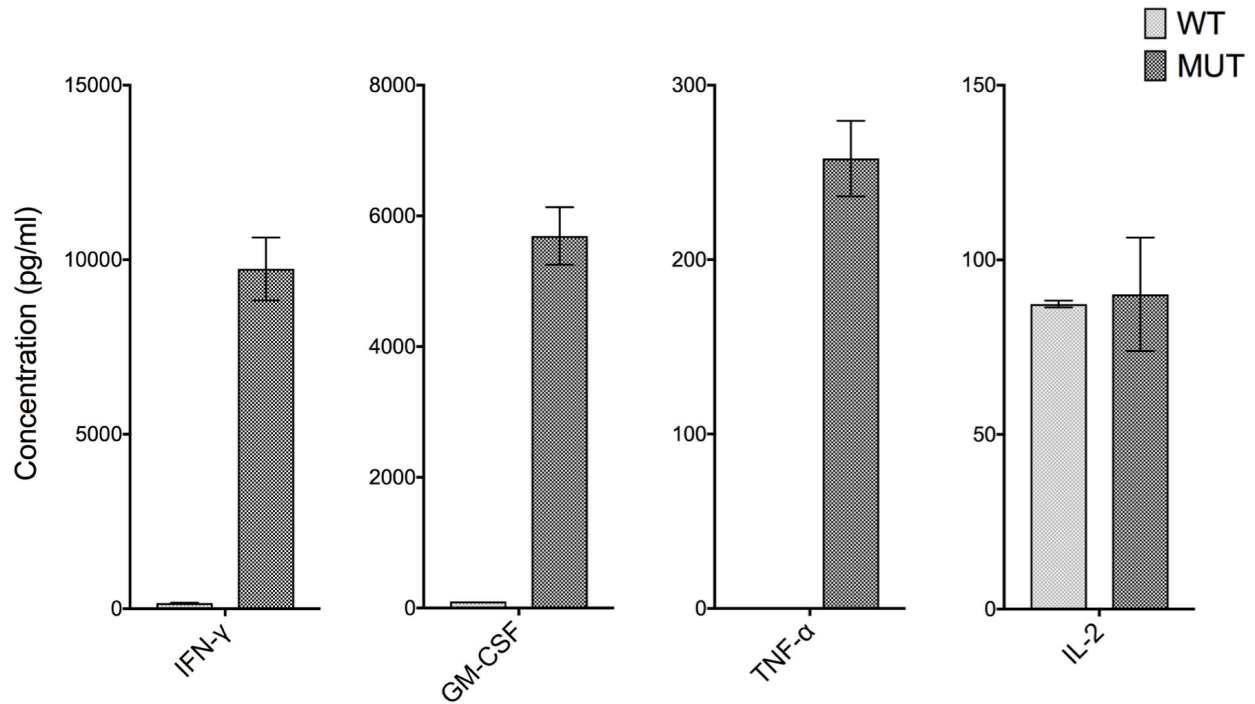

**Supplementary Figure 2.** F3 TILs were co-cultured with EBV-B cells pulsed with wild-type (WT) and mutant (MUT) CTBP1 25-mer peptide, followed by IFN- $\gamma$ , GM-CSF, TNF- $\alpha$ , IL-2 and IL-4 ELISA on the co-culture supernatants. IL-4 ELISA was negative (not depicted). Bars represent average reads from two duplicate wells; error bars represent SD.

### Supplementary Figure 3

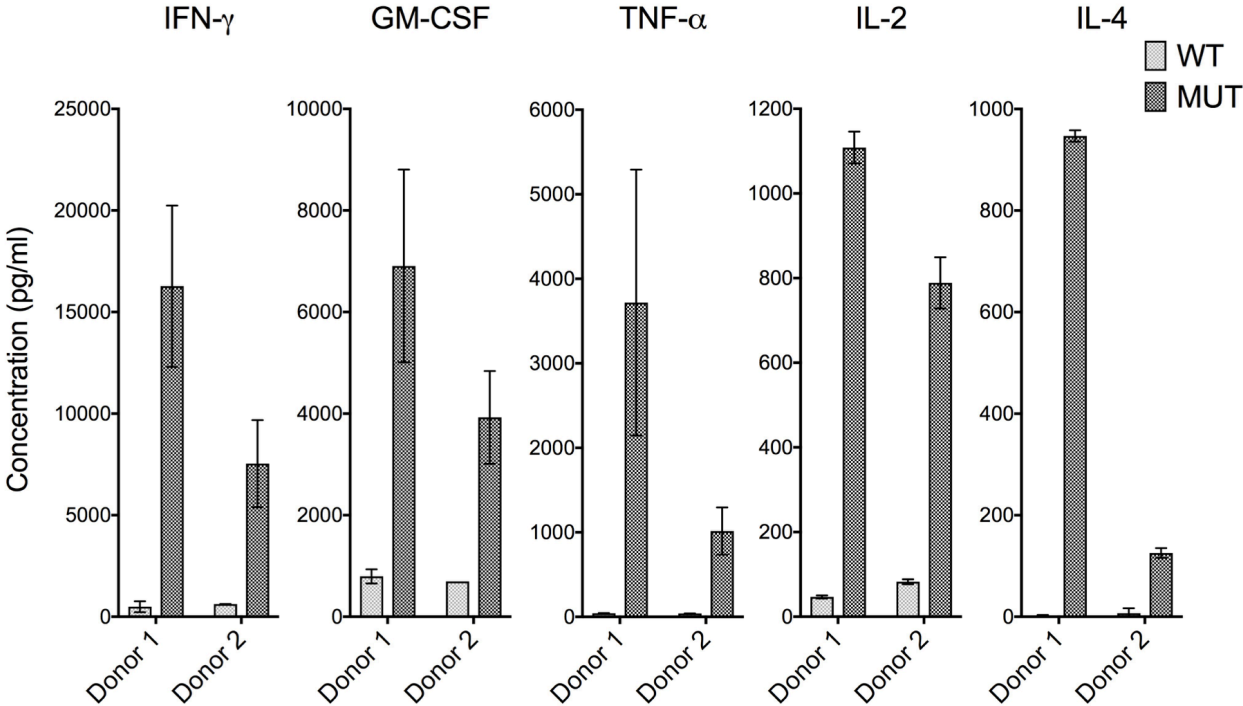

**Supplementary Figure 3.** CTBP1<sup>Q277R</sup>-TCR transduced CD4<sup>+</sup> T cells from the two donors were co-cultured overnight with EBV-B cells stimulated with WT or MUT CTBP1 25-mer peptide, followed by IFN-γ, GM-CSF, TNF-α, IL-2 and IL-4 ELISA on the co-culture supernatants. Bars represent average reads from two duplicate wells; error bars represent SD.

**Supplementary Table 1.** Nonsynonymous mutations, including single-nucleotide variants (SNV) and frameshift insertions/deletions, were identified from the tumor specimens of five patients. Mutations are listed in the order in which they were incorporated into the tandem-minigenes (TMGs).

**Patient #1**

| TMG | Gene name | Mutation type          | cDNA change  | Amino acid change | Wild type minigene sequence | Mutated minigene sequence  |
|-----|-----------|------------------------|--------------|-------------------|-----------------------------|----------------------------|
| 1   | ACAN      | nonsynonymous SNV      | c.C4347A     | p.S1449R          | VLETTAPGVVEISGLPSGEVLETST   | VLETTAPGVVEIRGLPSGEVLETST  |
| 1   | ACSL3     | nonsynonymous SNV      | c.G866A      | p.G289E           | LPSDIAVIMYTSGSTGLPKGVMISH   | LPSDIAVIMYTSESTGLPKGVMISH  |
| 1   | ADAM33    | nonsynonymous SNV      | c.C2033T     | p.P678L           | NHNCHCAPGWAPPFCDKPGFGGSM    | NHNCHCAPGWAPLFCDKPGFGGSM   |
| 1   | ADAM33    | nonsynonymous SNV      | c.C304T      | p.P102S           | TITATVLQAGLHPSVTSQALVAAWT   | TITATVLQAGLHSSVTSQALVAAWT  |
| 1   | AK130486  | nonsynonymous SNV      | c.T116A      | p.L39H            | GRVARGRPGTPPLPHRPLPRGAGPG   | GRVARGRPGTPPHRPLPRGAGPG    |
| 1   | ANAPC5    | nonsynonymous SNV      | c.T161G      | p.L54R            | NEMSRTGEGAVSLMERRRLNQLLLP   | NEMSRTGEGAVSRMERRRLNQLLLP  |
| 1   | CCDC87    | nonsynonymous SNV      | c.G1546C     | p.E516Q           | SDHLHFDQGGLVPAADKDWSTFLS    | SDHLHFDQGGLVQPAADKDWSTFLS  |
| 1   | CDC42BPG  | nonsynonymous SNV      | c.T2779A     | p.C927S           | FCHTTCAPQAPPQVPPDLLRTALG    | FCHTTCAPQAPPSPVPPDLLRTALG  |
| 1   | EIF3B     | nonsynonymous SNV      | c.C350A      | p.S117Y           | GEAPGEQARDERSDSRAQAVSEADAG  | GEAPGEQARDERYDSRAQAVSEADAG |
| 1   | ELF3      | nonsynonymous SNV      | c.G281A      | p.R94Q            | KNKYDASAI DFSRCMDGATLCNCA   | KNKYDASAI DFSQCMDGATLCNCA  |
| 1   | WIZ       | nonsynonymous SNV      | c.C496A      | p.P166T           | HLDLPAQPPPLAFRRVFPVEDTP     | HLDLPAQPPPLATFRRVFPVEDTP   |
| 1   | CDKN1A    | nonframeshift deletion | c.107_109del | p.36_37del        | CNHRDFFCSGAMSEPA GDV RQNPCG | CNHRDFFCSGAMPAGDVRQNPCGS   |
| 2   | DNAH3     | nonsynonymous SNV      | c.C9780G     | p.I3260M          | MSKGNILEDETAIKVLSSSKVLSEE   | MSKGNILEDETAMKVLSSSKVLSEE  |
| 2   | CTBP1     | nonsynonymous SNV      | c.A830G      | p.Q277R           | ARGGLVDEKALAQALKEGRIRGAAL   | ARGGLVDEKALARALKEGRIRGAAL  |
| 2   | C1QTNF4   | nonsynonymous SNV      | c.A58G       | p.T20A            | LLGPAACWALGPTPGGSSELRSF     | LLGPAACWALGPAPGGSSELRSF    |
| 2   | FAM133A   | nonsynonymous SNV      | c.G199A      | p.E67K            | SKALAEFEEKMNENWKKELEKSREK   | SKALAEFEEKMKNWKKELEKSREK   |
| 2   | FAM134A   | nonsynonymous SNV      | c.G838A      | p.E280K           | APPGGDEPLAETESEAE LAGFSP    | APPGGDEPLAETKSESEAE LAGFSP |
| 2   | FAM134A   | nonsynonymous SNV      | c.G850A      | p.E284K           | GDEPLAETESEAE LAGFSPVVDV    | GDEPLAETESKAE LAGFSPVVDV   |
| 2   | FAM194B   | nonsynonymous SNV      | c.T415C      | p.Y139H           | YLGKEEHLEEEYLGKEGYLEKEDY    | YLGKEEHLEEEH LGKEGYLEKEDY  |
| 2   | FAM47B    | nonsynonymous SNV      | c.A773T      | p.H258L           | HLRVDPPETGVSHLCPEPPKTLVSS   | HLRVDPPETGVSLLCPEPPKTLVSS  |
| 2   | FAM47C    | nonsynonymous SNV      | c.G2102T     | p.R701L           | HLRPEPPETGVSRLHPEPPKTRVSS   | HLRPEPPETGVSLHPEPPKTRVSS   |
| 2   | FAM65A    | nonsynonymous SNV      | c.G1439A     | p.G480E           | SVEAVGPESLAWGSPPTHPATHG     | SVEAVGPESLAWEPSPTHPATHG    |

|   |              |                     |             |           |                           |                           |
|---|--------------|---------------------|-------------|-----------|---------------------------|---------------------------|
| 2 | FAM83C       | nonsynonymous SNV   | c.C1369T    | p.R457W   | LLPRSRPLLQFHRGAPALSRFPENG | LLPRSRPLLQFHWGAPALSRFPENG |
| 2 | FGFR3        | nonsynonymous SNV   | c.A1118G    | p.Y373C   | EELVEADEAGSVYAGILSYGVGFLL | EELVEADEAGSVCAGILSYGVGFLL |
| 3 | FGL1         | nonsynonymous SNV   | c.C494A     | p.T165N   | EYWLGNKNLHFLTTQEDYTLKIDLA | EYWLGNKNLHFLNTQEDYTLKIDLA |
| 3 | FICD         | nonsynonymous SNV   | c.G1267A    | p.E423K   | VRPFIRFIAKCTETTLDTLLFATTE | VRPFIRFIAKCTKTTLDLTLFATTE |
| 3 | FOXD4        | nonsynonymous SNV   | c.C320A     | p.S107Y   | ASEDARQPAKPPSSYIALITMAILQ | ASEDARQPAKPPSYIALITMAILQ  |
| 3 | GALR2        | nonsynonymous SNV   | c.C820T     | p.R274C   | GQFPLTRATYALRILSHLVSYANSC | GQFPLTRATYALCILSHLVSYANSC |
| 3 | GAPVD1       | nonsynonymous SNV   | c.G670A     | p.E224K   | EDHLETDPNKLIERFSPSQEKLFG  | EDHLETDPNKLIKRFSPSQEKLFG  |
| 3 | GLI1         | nonsynonymous SNV   | c.C3233G    | p.S1078C  | DQRGSSGHTPPSPGPPNMAVGNMSV | DQRGSSGHTPPPCGPPNMAVGNMSV |
| 3 | HIST1H1C     | nonsynonymous SNV   | c.G468C     | p.K156N   | GATPKKSAKKTPKKAKKPAATVTK  | GATPKKSAKKTPNKAKKPAATVTK  |
| 3 | HLA-DQB1     | nonsynonymous SNV   | c.G703A     | p.V235I   | QSESAQSKMLSGVGGFVLGLIFLGL | QSESAQSKMLSGIGGFVLGLIFLGL |
| 3 | HLA-DRB5     | nonsynonymous SNV   | c.G505A     | p.A169T   | EVRWFRNSQEEKAGVVSTGLIQNGD | EVRWFRNSQEEKGVVSTGLIQNGD  |
| 3 | HRNR         | nonsynonymous SNV   | c.A3262T    | p.S1088C  | HGQHGSTSGQSSSCGQHGASSGQSS | HGQHGSTSGQSSCCGQHGASSGQSS |
| 3 | IGFN1        | nonsynonymous SNV   | c.A6127G    | p.R2043G  | EAGYRKDLGAPERIGSGSKAGFRDG | EAGYRKDLGAPEGIGSGSKAGFRDG |
| 3 | IGFN1        | nonsynonymous SNV   | c.A6132G    | p.I2044M  | AGYRKDLGAPERIGSGSKAGFRDGL | AGYRKDLGAPERMGSGSKAGFRDGL |
| 4 | IGSF9B       | nonsynonymous SNV   | c.C598T     | p.R200W   | VSDGSLTVTSVSREDRGAYTCRAYS | VSDGSLTVTSVSWEDRGAYTCRAYS |
| 4 | IVL          | nonsynonymous SNV   | c.A1428T    | p.Q476H   | EQEEKQLELPEQEQGVKHLEKQEA  | EQEEKQLELPEQHEQGVKHLEKQEA |
| 4 | KANSL1       | nonsynonymous SNV   | c.G13T      | p.D5Y     | MFLADVPTSLHFQSMK          | MFLAYVPTSLHFQSMK          |
| 4 | KDM6A        | nonsynonymous SNV   | c.C3361G    | p.H1121D  | FVRVVSAGNLLSHVGHITLGMNTVQ | FVRVVSAGNLLSDVGHITLGMNTVQ |
| 4 | KDM6A        | nonsynonymous SNV   | c.G3535C    | p.D1179H  | FVVPEGYWGVLNDFCEKNNLNFLMG | FVVPEGYWGVLNHFCEKNNLNFLMG |
| 4 | KIAA1683     | nonsynonymous SNV   | c.C3199T    | p.R1067C  | PPSVVMLVGSSPRTCHTCGRTPTR  | PPSVVMLVGSSPCTCHTCGRTPTR  |
| 4 | KIF21B       | nonsynonymous SNV   | c.G1452C    | p.E484D   | EAIGALIQNYIREIEELRTKLESE  | EAIGALIQNYIRDIEELRTKLESE  |
| 4 | KMT2D        | frameshift deletion | c.15430delC | p.Q5144fs | LCPMHKIKGPCEQELSSFAVFRVY  | LCPMHKIKGPCEKS            |
| 4 | KRTAP10-1    | nonsynonymous SNV   | c.G604T     | p.V202F   | KPVCKPICCVPCSGASTSCCQQS   | KPVCKPICCVPCSGASTSCCQQS   |
| 4 | LEMD2        | nonsynonymous SNV   | c.G601C     | p.E201Q   | RAGPAGAARARPEVGRRLERWLSRL | RAGPAGAARARPVGRRLERWLSRL  |
| 4 | LHX9         | nonsynonymous SNV   | c.C1034T    | p.P345L   | GVDKADGTSLPAPPSADSGALTPPG | GVDKADGTSLPALPSADSGALTPPG |
| 4 | LOC100129195 | nonsynonymous SNV   | c.C534G     | p.I178M   | QPPLAAAAFIPELLLTINRNPEKS  | QPPLAAAAFIPEMLLTINRNPEKS  |
| 5 | MACF1        | nonsynonymous SNV   | c.G1240A    | p.E414K   | EEEWGKLIIEMLEREKSLRPAVERL | EEEWGKLIIEMLKREKSLRPAVERL |
| 5 | MELK         | nonsynonymous SNV   | c.G532C     | p.E178Q   | QTCCGSLAYAAPQLIQGKSYLGSEA | QTCCGSLAYAAPQLIQGKSYLGSEA |

|   |         |                   |          |          |                            |                           |
|---|---------|-------------------|----------|----------|----------------------------|---------------------------|
| 5 | MGA     | nonsynonymous SNV | c.A767G  | p.K256R  | ITQLKIDYNPFAKGRDDGLNNKPQ   | ITQLKIDYNPFARGFRDDGLNNKPQ |
| 5 | MUC12   | nonsynonymous SNV | c.T9325A | p.Y3109N | TTAGLSEKSTTFYSSPRSPDTTLSP  | TTAGLSEKSTTFNSSPRSPDTTLSP |
| 5 | MUC21   | nonsynonymous SNV | c.A289T  | p.T97S   | SGISTATNSEFSTVSSGISIATNSE  | SGISTATNSEFSSVSSGISIATNSE |
| 5 | MUC22   | nonsynonymous SNV | c.G3305T | p.G1102V | AGSETTTTTSTEGSETTTASTEGSE  | AGSETTTTTSTEVSETTTASTEGSE |
| 5 | MYEF2   | nonsynonymous SNV | c.G92A   | p.R31Q   | HLQPAEPPGEPREPHPAEAEKQQP   | HLQPAEPPGEPREQEPHAEAEKQQP |
| 5 | MYOM2   | nonsynonymous SNV | c.C2696T | p.S899L  | VRAVNANGVGKPSDTSEPVLEARP   | VRAVNANGVGKPLDTSEPVLEARP  |
| 5 | NARR    | nonsynonymous SNV | c.G172A  | p.E58K   | PPDGTTPRQLAAEESPRPRVIFGTP  | PPDGTTPRQLAAKESPRPRVIFGTP |
| 5 | NAV2    | nonsynonymous SNV | c.G5313T | p.K1771N | VGSNIESDSKKKKRKNWLRSSFQKA  | VGSNIESDSKKKNRKNWLRSSFQKA |
| 5 | NAV2    | nonsynonymous SNV | c.G5313T | p.K1771N | VGSNIESDSKKKKRKNWVNLRSSF   | VGSNIESDSKKKNRKNWVNLRSSF  |
| 5 | NBPF10  | nonsynonymous SNV | c.A841G  | p.S281G  | NVSMVVSAGPLSSEKAEMNILEINE  | NVSMVVSAGPLSGEKAEMNILEINE |
| 6 | NEK4    | nonsynonymous SNV | c.G2110A | p.E704K  | DGDYGEGKGQTNEINALVQLMTQTL  | DGDYGEGKGQTNKINALVQLMTQTL |
| 6 | OGFRL1  | nonsynonymous SNV | c.G578T  | p.R193I  | IEEFKKTKEAIRRFLLAYKMMLEFF  | IEEFKKTKEAIRFLLAYKMMLEFF  |
| 6 | OR10Z1  | nonsynonymous SNV | c.C728T  | p.S243L  | AEGQKKAFASTCASHLTVVHHYGCA  | AEGQKKAFASTCALHLTVVHHYGCA |
| 6 | PIK3CA  | nonsynonymous SNV | c.G353A  | p.G118D  | GNREEKILNREIGFAIGMPVCEFDM  | GNREEKILNREIDFAIGMPVCEFDM |
| 6 | PLCG2   | nonsynonymous SNV | c.G2671T | p.D891Y  | KQQGDPPEFATDRVEELFEWFQSI   | KQQGDPPEFATYRVEELFEWFQSI  |
| 6 | PRDM5   | nonsynonymous SNV | c.C649T  | p.H217Y  | GKKFPVKQALQRHFEQHQETCRGDA  | GKKFPVKQALQRYFEQHQETCRGDA |
| 6 | PRDM5   | nonsynonymous SNV | c.C649T  | p.H217Y  | GKKFPVKQALQRHVLQCTAKSSLKE  | GKKFPVKQALQRYVLQCTAKSSLKE |
| 6 | PRSS1   | nonsynonymous SNV | c.G238A  | p.E80K   | LRLGKMDGRGGGEENLLAAADSPEQ  | LRLGKMDGRGGKENLLAAADSPEQ  |
| 6 | RAET1L  | nonsynonymous SNV | c.A191G  | p.Y64C   | VQGQVDEKTFLLHYDCGNKTVTPVSP | VQGQVDEKTFLLHDCGNKTVTPVSP |
| 6 | RALB    | nonsynonymous SNV | c.A128G  | p.Y43C   | TLQFMYDEFVEDYEPTKADSYRKKV  | TLQFMYDEFVEDCEPTKADSYRKKV |
| 6 | RALB    | nonsynonymous SNV | c.A191G  | p.Y64C   | KKVEGILEFVEDYEPTKADSYRKKV  | KKVEGILEFVEDCEPTKADSYRKKV |
| 6 | RAPGEF5 | nonsynonymous SNV | c.G1388A | p.R463Q  | DLVSKSLEASGRIYVYRKDLADTL   | DLVSKSLEASGQIYVYRKDLADTL  |
| 7 | RBM6    | nonsynonymous SNV | c.A224G  | p.Y75C   | PPFANVEEHSFSYGARDGPHGDYRG  | PPFANVEEHSFSCGARDGPHGDYRG |
| 7 | RBMXL3  | nonsynonymous SNV | c.C1864A | p.H622N  | AYSGGHDSSSWSHRYGGGGRYEEYR  | AYSGGHDSSSWSNRYGGGGRYEEYR |
| 7 | RBMXL3  | nonsynonymous SNV | c.A2179T | p.T727S  | SLDANSGGRSPDYSRGRDSSSQSD   | SLDANSGGRSPDYSRGRDSSSQSD  |
| 7 | RDH12   | nonsynonymous SNV | c.C271G  | p.Q91E   | AASEIRVDTKNSQVLRKLDLSDTK   | AASEIRVDTKNSEVLVRKLDLSDTK |
| 7 | RECQL4  | nonsynonymous SNV | c.G1324A | p.E442K  | PEPLVSPQPVPVPSLDPTVLPY     | PEPLVSPQPVPVPSLDPTVLPY    |
| 7 | RHOB    | nonsynonymous SNV | c.T137C  | p.I46T   | YVPTVFENYVADIEVDGKQVELALW  | YVPTVFENYVADTEVDGKQVELALW |

|   |                   |                        |                |              |                             |                                 |
|---|-------------------|------------------------|----------------|--------------|-----------------------------|---------------------------------|
| 7 | RP2               | nonsynonymous SNV      | c.C12A         | p.F4L        | MGCFFSKRRKADKESR            | MGCLFSKRRKADKESR                |
| 7 | RRBP1             | nonsynonymous SNV      | c.T845C        | p.V282A      | KKVDTPNQGKKVEGAPTQGRKAEG    | KKVDTPNQGKKAEGAPTQGRKAEG        |
| 7 | SBK3              | nonsynonymous SNV      | c.C104G        | p.P35R       | QRLVELTTSRVTPVRSLRDQYHLIR   | QRLVELTTSRVTRVRSRLRDQYHLIR      |
| 7 | SCN1A             | nonsynonymous SNV      | c.C3636A       | p.F1212L     | RGKQWWNLRRCTCFRIVEHNWFETFI  | RGKQWWNLRRTCLRIVEHNWFETFI       |
| 7 | SEMA4G            | nonsynonymous SNV      | c.G212T        | p.G71V       | LLLEEASARLLVGARGALFSL SAND  | LLLEEASARLLVVARGALFSL SAND      |
| 7 | SH2B1             | nonsynonymous SNV      | c.G1921C       | p.E641Q      | QRQQGEQSR SAGEEVPVHPRSEAGS  | QRQQGEQSR SAGQEVVHPRSEAGS       |
| 8 | SLCO4A1           | nonsynonymous SNV      | c.C1380G       | p.F460L      | RLRGS AVIKFCLFCTVVSLLGILVF  | RLRGS AVIKFCLLCTVVSLLGILVF      |
| 8 | SPHK1             | nonsynonymous SNV      | c.A128C        | p.E43A       | GAPAA TAPGGEGEPHSR PCDARLGS | GAPAA TAPGGEGAPHSR PCDARLGS     |
| 8 | SPTBN5            | nonsynonymous SNV      | c.G2515A       | p.E839K      | PGESLRNPGPWSEASCHPGPGDAWK   | PGESLRNPGPWSKASCHPGPGDAWK       |
| 8 | SYNE2             | nonsynonymous SNV      | c.T4163C       | p.F1388S     | HLDKCLKMLDMSFKDAERGD DTSCE  | HLDKCLKMLDMSKDAERGD DTSCE       |
| 8 | TAF4              | nonsynonymous SNV      | c.G2131T       | p.A711S      | SSSVQRTAGKTAATVTSALQPPVLS   | SSSVQRTAGKTASTVTSALQPPVLS       |
| 8 | TCF21             | nonsynonymous SNV      | c.G218T        | p.S73I       | KAPT KKSPLSGVSQEGKQVQRNAAN  | KAPT KKSPLSGVIQEGKQVQRNAAN      |
| 8 | TCRBV5S6<br>A3N2T | nonsynonymous SNV      | c.G20T         | p.C7F        | MGPGLLCWALLC LLGAGSV        | MGPGLLFWALLC LLGAGSV            |
| 8 | TDRD9             | nonsynonymous SNV      | c.C388A        | p.P130T      | SVTCIPGTTYKY PDLPI SRYKEEVV | SVTCIPGTTYKY TDLPI SRYKEEVV     |
| 8 | TENC1             | nonsynonymous SNV      | c.C4033T       | p.R1345C     | ITLTDNQRKLFRRHY PVNSITFSS   | ITLTDNQRKLFRCRHY PVNSITFSS      |
| 8 | TEX36             | nonsynonymous SNV      | c.C58G         | p.H20D       | NPPSDKDGRWFP HIGLTQKT PESIT | NPPSDKDGRWFP DIGLTQKT PESIT     |
| 8 | THADA             | nonsynonymous SNV      | c.G5629A       | p.E1877K     | PEMLCHLQRMVSE QCHLLSQFFREL  | PEMLCHLQRMVSKQCHLLSQFFREL       |
| 8 | TMEM178B          | nonsynonymous SNV      | c.C703T        | p.R235C      | VAGINFELSRYPRYLYGLPDDISHG   | VAGINFELSRYPCYLYGLPDDISHG       |
| 9 | TRO               | frameshift deletion    | c.428_429del   | p.K143fs     | SVTAQPKKANKMKRV TAAAAQGSQS  | SVTAQPKKANKMKS YCQGS PRLPIP NWP |
| 9 | TUBGCP3           | nonframeshift deletion | c.1241_1255del | p.414_419del | TRDFPTRDFPTRDFP MHVFPTRVFP  | TRDFPTRDFPTRVFPTRVFPTRVWH       |
| 9 | UBE3A             | nonsynonymous SNV      | c.G977C        | p.R326T      | SKLPLAAQGKLIRLWSKY NADQIRR  | SKLPLAAQGKLITLWSKY NADQIRR      |
| 9 | UNK               | nonsynonymous SNV      | c.G1946T       | p.R649L      | AFLSGP GAAELARLRQELDEANSTI  | AFLSGP GAAELALLRQELDEANSTI      |
| 9 | USP47             | nonsynonymous SNV      | c.A1196G       | p.Y399C      | ISKSGLEKNSLIYELFSVMVHSGSA   | ISKSGLEKNSLICELFSVMVHSGSA       |
| 9 | VEGFB             | nonsynonymous SNV      | c.A425C        | p.H142P      | DSAVKPDRAATPHHRPQRSVPGWD    | DSAVKPDRAATPPHRPQRSVPGWD        |
| 9 | VWA5B2            | nonsynonymous SNV      | c.G268A        | p.G90S       | RRRSQAACCRALGPGLTPTPRRCA    | RRRSQAACCRALSPGLTPTPRRCA        |
| 9 | WNK3              | nonsynonymous SNV      | c.G985A        | p.V329I      | APEMYEEHYDESVDVYAFGMCMLEM   | APEMYEEHYDESIDVYAFGMCMLEM       |
| 9 | ZAN               | nonsynonymous SNV      | c.C2843A       | p.P948H      | ISTEKLTIPT EKPTISPEKLTIPTE  | ISTEKLTIPT EKHTISPEKLTIPTE      |
| 9 | ZBTB39            | nonsynonymous SNV      | c.G877A        | p.E293K      | EHSKDPGFGQMD ELQLEDLGDDDLQ  | EHSKDPGFGQMD KLQLEDLGDDDLQ      |

|    |         |                      |                                                           |          |                           |                                                                                                       |
|----|---------|----------------------|-----------------------------------------------------------|----------|---------------------------|-------------------------------------------------------------------------------------------------------|
| 9  | ZFP36L2 | nonsynonymous SNV    | c.G745A                                                   | p.E249K  | GTRDALHLGFPREPRPKLHHSLSFS | GTRDALHLGFPKPRPKLHHSLSFS                                                                              |
| 9  | ZNF14   | nonsynonymous SNV    | c.C340T                                                   | p.H114Y  | PHECSFCGRDFIHHSSLNRHMRSHT | PHECSFCGRDFIYHSSLNRHMRSHT                                                                             |
| 10 | ZNF197  | nonsynonymous SNV    | c.C1301A                                                  | p.A434E  | GEKPYKCNECGKAFSQAAYLLNHQR | GEKPYKCNECGKEFSQAAYLLNHQR                                                                             |
| 10 | ZNF208  | nonsynonymous SNV    | c.G1474T                                                  | p.A492S  | PYKCEECDKATHAGEKPYKCEECGK | PYKCEECDKATHSGEKPYKCEECGK                                                                             |
| 10 | ZNF430  | nonsynonymous SNV    | c.T1233A                                                  | p.N411K  | KFYKCEECGKGFNWSSTLTKHKRIH | KFYKCEECGKGFKWSSTLTKHKRIH                                                                             |
| 10 | ZNF430  | nonsynonymous SNV    | c.T1234A                                                  | p.W412R  | FYKCEECGKGFNWSSTLTKHKRIHT | FYKCEECGKGFNRSSTLTKHKRIHT                                                                             |
| 10 | ZNF460  | nonsynonymous SNV    | c.G248T                                                   | p.G83V   | PEEVSLQEQLAQVPRYSYLGQAMD  | PEEVSLQEQLAQVPRYSYLGQAMD                                                                              |
| 10 | ZNF548  | nonsynonymous SNV    | c.G1141T                                                  | p.V381F  | VCGELFRYNSSLVKHWRNHTGERPY | VCGELFRYNSSLFKHWRNHTGERPY                                                                             |
| 10 | ZNF606  | nonsynonymous SNV    | c.C310G                                                   | p.Q104E  | LETYGHLLSVGNQIAKPEVISLLEQ | LETYGHLLSVGNEIAKPEVISLLEQ                                                                             |
| 10 | ZNF626  | nonsynonymous SNV    | c.A764G                                                   | p.K255R  | TLTTHKRNHTGEKPYKCDKCGKAFM | TLTTHKRNHTGERPYKCDKCGKAFM                                                                             |
| 10 | ZNF732  | nonsynonymous SNV    | c.A1332T                                                  | p.K444N  | DLNKHKIIHTGEKPYKCEECGKAFG | DLNKHKIIHTGENPYKCEECGKAFG                                                                             |
| 10 | ZNF853  | nonsynonymous SNV    | c.G585T                                                   | p.Q195H  | QEQQVLQQEQLQQVQEQQLLQQQ   | QEQQVLQQEQLHQVQEQQLLQQQ                                                                               |
| 10 | ZNF91   | nonsynonymous SNV    | c.T1321A                                                  | p.W441R  | PFKCKEKGKAFIWSSTLTRHKRIHT | PFKCKEKGKAFIRSSTLTRHKRIHT                                                                             |
| 10 | ZNFX1   | nonsynonymous SNV    | c.C5527G                                                  | p.R1843G | ERVQIVSAIGYPRGHWFKCRNGHIY | ERVQIVSAIGYPGGHWFKCRNGHIY                                                                             |
| 11 | LNP1    | frameshift insertion | c.207_208insT<br>CTCATGAGG<br>ACCAGGAAT<br>TCCGATGCC<br>G | p.H69fs  | PRIPSSDCHPRRSHEDQEFRCRSH  | PRIPSSDCHPRRSHEDQEFRCRLMRTKNFDVATYGITENT<br>QRMGHSRSHWNQKEDPIPKLRNFQSPLNGNCALEPSVLPW<br>DLKAERREMKENA |
| 11 | ZFP36L1 | frameshift insertion | c.453dupC                                                 | p.K152fs | GIHELRSLTRHPKYKTELCRTFHTI | GIHELRSLTRHPQVQDGAVPHLPHHRLPLRAPLPLHPQR                                                               |
| 11 | ZNF41   | frameshift insertion | c.1335dupG                                                | p.K446fs | TGEKPYVCADCGKAFIQKSHFNTHQ | TGEKPYVCADCGELHPEITFQHTSENSYWRKAV                                                                     |



## Patient #2

| TMG | Gene name | Mutation type     | cDNA change | Amino acid change | Wild type minigene sequence | Mutated minigene sequence  |
|-----|-----------|-------------------|-------------|-------------------|-----------------------------|----------------------------|
| 1   | AHNAK2    | nonsynonymous SNV | c.A11876C   | p.K3959T          | GARLEGDLSLADKDMTAKDSKFKMP   | GARLEGDLSLADTDMTAKDSKFKMP  |
| 1   | AHNAK2    | nonsynonymous SNV | c.G2557A    | p.E853K           | PSFGVSAPGKSMEDSVDSAPKVEA    | PSFGVSAPGKSMKDSVDVSAPKVEA  |
| 1   | AK293147  | nonsynonymous SNV | c.T116C     | p.L39P            | SLAWLNRVPPTPLSPPPPTGPASS    | SLAWLNRVPPTPLSPPPPTGPASS   |
| 1   | AK293147  | nonsynonymous SNV | c.T20C      | p.L7P             | MCPPQPLSPYQSADRPSVPLPPWS    | MCPPQPPSPYQSADRPSV         |
| 1   | AKNA      | nonsynonymous SNV | c.T1666G    | p.W556G           | AGWGRKPWDRGWGGGEAWGGGWLQ    | AGWGRKPWDRGWGGGEAWGGGWLQ   |
| 1   | AQP10     | nonsynonymous SNV | c.T107C     | p.L36P            | CLAEFLGVFVLMMLLTQGAVAQAVTS  | CLAEFLGVFVLMPLTQGAVAQAVTS  |
| 1   | ATP2A3    | nonsynonymous SNV | c.A1166T    | p.Y389F           | CLLHEFTISGTTYTPEGEVRQGDQP   | CLLHEFTISGTTFTPEGEVRQGDQP  |
| 1   | BAGE      | nonsynonymous SNV | c.C26A      | p.A9E             | MAARAVFLALSAQLLQARLMKEESP   | MAARAVFLELSAQLLQARLMK      |
| 1   | BAGE3     | nonsynonymous SNV | c.C26A      | p.A9E             | MAAGAVFLALSAQLLQARLMKEESP   | MAAGAVFLELSAQLLQARLMK      |
| 1   | BAGE3     | nonsynonymous SNV | c.C26A      | p.A9E             | MAAGVVFLALSAQLLQARLMKEESP   | MAAGVVFLELSAQLLQARLMK      |
| 1   | C11orf95  | nonsynonymous SNV | c.C88A      | p.L30M            | PGPAVASARGRRLPPAGSSGSAEPE   | PGPAVASARGRRMPPAGSSGSAEPE  |
| 1   | CCNK      | nonsynonymous SNV | c.A1217C    | p.H406P           | TDLPKVQIPPAHPAPVHQPPPLPH    | TDLPKVQIPPPAPPAPVHQPPPLPH  |
| 2   | CDC27     | nonsynonymous SNV | c.A1276G    | p.I426V           | ALCSYNCKEAINILSHLPSHHYNTG   | ALCSYNCKEAINVLSHLPSHHYNTG  |
| 2   | CDH19     | nonsynonymous SNV | c.C1189A    | p.P397T           | QGSFVGVVSATDPDNRKSPIRYSIT   | QGSFVGVVSATDNDNRKSPIRYSIT  |
| 2   | CELSR3    | nonsynonymous SNV | c.G5486A    | p.G1829D          | LDRGLLSVTVTRSGRASHLLLDQV    | LDRGLLSVTVTRDSGRASHLLLDQV  |
| 2   | CFD       | nonsynonymous SNV | c.G83T      | p.G28V            | AACAAPRGRILGGREAEAHARPYM    | AACAAPRGRILVGREAEAHARPYM   |
| 2   | CHORDC1   | nonsynonymous SNV | c.G313T     | p.A105S           | DEPMTNLELKISASLKQALDKLKLS   | DEPMTNLELKISSSLKQALDKLKLS  |
| 2   | CNTN4     | nonsynonymous SNV | c.T2813G    | p.V938G           | ALDNESEVKGYKVLRYRWNRSSTSV   | ALDNESEVKGYKGLRYRWNRSSTSV  |
| 2   | CNTNAP3B  | nonsynonymous SNV | c.T3517C    | p.F1173L          | TSGFTGCLSAVRFGRAAPLKAALRP   | TSGFTGCLSAVRLGRAAPLKAALRP  |
| 2   | CNTNAP3B  | nonsynonymous SNV | c.T3517C    | p.F1173L          | TSGFTGCLSAVRFCAAPLKAALRP    | TSGFTGCLSAVRLGCAAPLKAALRP  |
| 2   | CNTROB    | nonsynonymous SNV | c.A289C     | p.T97P            | FQGLRDALDSEHTRRKHCERHIQSL   | FQGLRDALDSEHPRRKHCERHIQSL  |
| 2   | CNTROB    | nonsynonymous SNV | c.C1424A    | p.P475Q           | WDEANQLLSTTLPPNPPAPPAGPS    | WDEANQLLSTTLQPPNPPAPPAGPS  |
| 2   | COL4A5    | nonsynonymous SNV | c.G1228C    | p.D410H           | PPGFPPGERGQKGDGEPGGSIPGPP   | PPGFPPGERGQKGHEGPPGISIPGPP |
| 2   | COL9A2    | nonsynonymous SNV | c.G296T     | p.G99V            | GPRGPPGRAGEKGDGEGSPGIRGPQG  | GPRGPPGRAGEKVDGEGSPGIRGPQG |
| 3   | CTBP1     | nonsynonymous SNV | c.G640T     | p.A214S           | FYDPYLSDGVERALGLQRVSTLQDL   | FYDPYLSDGVERSLGLQRVSTLQDL  |
| 3   | CTNS      | nonsynonymous SNV | c.T404A     | p.L135H           | QRVSWPAIGFLVLAWLFAFVTMIVA   | QRVSWPAIGFLVHAWLFAFVTMIVA  |

|   |          |                   |          |         |                           |                           |
|---|----------|-------------------|----------|---------|---------------------------|---------------------------|
| 3 | CYTH2    | nonsynonymous SNV | c.A394C  | p.T132P | GHHSAPVGPLPPTPQTQLLPSHWQL | GHHSAPVGPLPPPQTQLLPSHWQL  |
| 3 | DAZL     | nonsynonymous SNV | c.G10A   | p.A4T   | MSTANPETPNSTISREASTQSSSAA | MSTTNPETPNSTISRE          |
| 3 | DAZL     | nonsynonymous SNV | c.G70A   | p.A24T  | ARLTPLPHESTANPETPNSTISRE  | ARLTPLPHESTTNPETPNSTISRE  |
| 3 | DHRS4L2  | nonsynonymous SNV | c.A373T  | p.S125C | APRPGASHPATPSIQTLRQPLHLSP | APRPGASHPATPCIQTLRQPLHLSP |
| 3 | DLEU7    | nonsynonymous SNV | c.C169A  | p.P57T  | HVSTAPARRSGPPRARPGGREERG  | HVSTAPARRSGPTRARPGGREERG  |
| 3 | DNM1P41  | nonsynonymous SNV | c.C484T  | p.R162C | ICVVTLPTHVLQRAEHLHAPDPCGT | ICVVTLPTHVLQCAEHLHAPDPCGT |
| 3 | DTYMK    | nonsynonymous SNV | c.G495T  | p.E165D | MVDASKSIEAVHEDIRVLSAIRT   | MVDASKSIEAVHDDIRVLSAIRT   |
| 3 | DUX2     | nonsynonymous SNV | c.G599C  | p.G200A | TGLPAPHVPCAPGALPQGAFVSQAA | TGLPAPHVPCAPAALPQGAFVSQAA |
| 3 | DUX4L4   | nonsynonymous SNV | c.C997A  | p.P333T | AAWEPQAGEAPPPQPAPPDASARQG | AAWEPQAGEAPPTQPAPPDASARQG |
| 3 | DYRK1B   | nonsynonymous SNV | c.A1703C | p.D568A | MTGGRPPLPPDDPATLGPLHLGRG  | MTGGRPPLPPDAPATLGPLHLGRG  |
| 4 | EML6     | nonsynonymous SNV | c.T134G  | p.V45G  | GKEVVYFVAGVGVVYNTREHSQKFF | GKEVVYFVAGVGGVYNTREHSQKFF |
| 4 | SREBF1   | nonsynonymous SNV | c.C2A    | p.A1D   | AVQLFLCDLLLVRVTRSLWRQQPPA | DVQLFLCDLLLVV             |
| 4 | DAZL     | nonsynonymous SNV | c.G124A  | p.A42T  | MSSSLLLLPKSTANPETPNSTISRE | MSSSLLLLPKSTTNPETPNSTISRE |
| 4 | FAM118A  | nonsynonymous SNV | c.T593C  | p.V198A | WGVLCPGSCSHFAVNY          | WGVLCPGSCSHFAAVNY         |
| 4 | OLFM2    | nonsynonymous SNV | c.T50C   | p.M17T  | LLKIGAVLSTMAMVTNWMSQTLPSL | LLKIGAVLSTMATVTNWMSQTLPSL |
| 4 | SUB1     | nonsynonymous SNV | c.G167A  | p.S56N  | ETSRALSSSKQSSSRDDNMFQELF  | ETSRALSSSKQSNSSRDDNMFQELF |
| 4 | SUB1     | nonsynonymous SNV | c.G167A  | p.S56N  | ETSRALSSSKQSSSRDDNMFQV    | ETSRALSSSKQSNSSRDDNMFQV   |
| 4 | TCEAL4   | nonsynonymous SNV | c.T268G  | p.W90G  | KNGYGRGKGWGWGRVESREAGPSV  | KNGYGRGKGWGGGRVESREAGPSV  |
| 4 | CCNG2    | nonsynonymous SNV | c.T955C  | p.F319L | AQAGVQWPDLSFQPPTRFKRFSC   | AQAGVQWPDLSLQPPTRFKRFSC   |
| 4 | UQCRC2   | nonsynonymous SNV | c.G23A   | p.G8D   | MKLLTRAGSFSFTKLPNGLVIASLE | MKLLTRADSFSFTKLPNGLV      |
| 4 | ARHGDI   | nonsynonymous SNV | c.T575C  | p.L192P | RTTDRRMCPQPLPSPYQSADRPSV  | RTTDRRMCPQPPSPYQSADRPSV   |
| 4 | MGST3    | nonsynonymous SNV | c.T371C  | p.I124T | RLASLGHTGRRRIVLGH         | RLASLGHTGRRRTVLGH         |
| 5 | SAMD8    | nonsynonymous SNV | c.C95A   | p.A32E  | PPPPLEALHSGEAGRAPDSDGGSDA | PPPPLEALHSGEAGRAPDSDGGSDA |
| 5 | ZNF6     | nonsynonymous SNV | c.A902T  | p.K301I | NLTTHKKIHTGEKPYKCEECGKAFK | NLTTHKKIHTGEIPYKCEECGKAFK |
| 5 | UBQLN4   | nonsynonymous SNV | c.A508C  | p.T170P | QRRVYARGPHFLTSHASHIFSNRGF | QRRVYARGPHFLPSHASHIFSNRGF |
| 5 | TMEM184A | nonsynonymous SNV | c.A383T  | p.E128V | YYVYFDSVRDCYEAFVIYSFLSLC  | YYVYFDSVRDCYVAFVIYSFLSLC  |
| 5 | TMEM184A | nonsynonymous SNV | c.A383T  | p.E128V | YYVYFDSVRDCYEAS           | YYVYFDSVRDCYVAS           |
| 5 | CNTROB   | nonsynonymous SNV | c.A583C  | p.T195P | FQGLRDALDSEHTRRK          | FQGLRDALDSEHPRRK          |

|   |            |                   |          |          |                            |                           |
|---|------------|-------------------|----------|----------|----------------------------|---------------------------|
| 5 | GOLGA6L2   | nonsynonymous SNV | c.G2605C | p.A869P  | GEDVGAGGEDVGAGGDAREGGEDTR  | GEDVGAGGEDVPGGDAREGGEDTR  |
| 5 | GOLGA6L2   | nonsynonymous SNV | c.G820C  | p.A274P  | RQEKMQREQEDVGAGGDAREGGEDTR | RQEKMQREQEDVPGGDAREGGEDTR |
| 5 | GOLGA6L2   | nonsynonymous SNV | c.C2542G | p.P848A  | GEDAGAGGEDAGPGGEDVPGGEDV   | GEDAGAGGEDAGAGGEDVPGGEDV  |
| 5 | DPP7       | nonsynonymous SNV | c.C545T  | p.P182L  | AQLGCAATLAAFPSESTRTWPRVG   | AQLGCAATLAAFLSESTRTWPRVG  |
| 5 | ALDH1A3    | nonsynonymous SNV | c.T116C  | p.L39P   | LEVKFTKVRRAPLPPDGRGPLRWAA  | LEVKFTKVRRAPPPDGRGPLRWAA  |
| 5 | CFD        | nonsynonymous SNV | c.G104T  | p.G35V   | WAWAAPPRGRILGGREAEAHARPYM  | WAWAAPPRGRILVGREAEAHARPYM |
| 6 | IGHV3-13   | nonsynonymous SNV | c.G49A   | p.V17I   | LSWVFLVAILEGVQCEVQLVESGGG  | LSWVFLVAILEGIQCEVQLVESGGG |
| 6 | IGHV3-38   | nonsynonymous SNV | c.G70T   | p.V24L   | GILKGVQCEVQLVESGGGLVQPRGS  | GILKGVQCEVQLLESGGGLVQPRGS |
| 6 | ZNF99      | nonsynonymous SNV | c.C2862A | p.S954R  | KPYKCEERGKAFSHFSRLTKHRIIH  | KPYKCEERGKAFRHSRLTKHRIIH  |
| 6 | NBPF1      | nonsynonymous SNV | c.C3113T | p.T1038M | KGKGGKRRRGRSTKRRRRRGRKEGE  | KGKGGKRRRGRSMKRRRRRGRKEGE |
| 6 | NBPF1      | nonsynonymous SNV | c.G3030T | p.E1010D | SCLPYGSSFYALEEKHVGFSLDVGE  | SCLPYGSSFYALDEKHVGFSLDVGE |
| 6 | NBPF1      | nonsynonymous SNV | c.A2936T | p.Q979L  | RELLEAVEPEVLQDSLDRCYSTPSS  | RELLEAVEPEVLLDSLDRCYSTPSS |
| 6 | HLA-DQB2   | nonsynonymous SNV | c.G748A  | p.G250S  | IFLGLGLIIRHRGQKGRGPPPPAGL  | IFLGLGLIIRHRSQKGRGPPPPAGL |
| 6 | DUX4L4     | nonsynonymous SNV | c.C814A  | p.P272T  | PPHPGKSREDRDPQRDGLPGCAVA   | PPHPGKSREDRDTQRDGLPGCAVA  |
| 6 | DUX4L4     | nonsynonymous SNV | c.G1032T | p.Q344H  | PPQPAPPDASARQGQMGPAPSQA    | PPQPAPPDASARHGQMGPAPSQA   |
| 6 | AC026202.3 | nonsynonymous SNV | c.G541T  | p.A181S  | AAGIILKRGGLPADHRTPRSPRSPA  | AAGIILKRGGLPDHRTPRSPRSPA  |
| 6 | MUC-B1     | nonsynonymous SNV | c.G206A  | p.G69D   | RKPQQLQRRPAGGTGQRRGSGCSPS  | RKPQQLQRRPAGDTGQRRGSGCSPS |
| 6 | MUC-B1     | nonsynonymous SNV | c.G404C  | p.R135T  | QRRGSAAPVPTSRGTGQRRGSAAPA  | QRRGSAAPVPTSTGTGQRRGSAAPA |
| 7 | EVX2       | nonsynonymous SNV | c.G1145T | p.G382V  | ASSAAAAGAPPSGGSAPCSCLSCHS  | ASSAAAAGAPPSVGSAPCSCLSCHS |
| 7 | FBXL19-AS1 | nonsynonymous SNV | c.A88C   | p.T30P   | SLSRSPLSTTLGTSPACGLEIPPTS  | SLSRSPLSTTLGPSPACGLEIPPTS |
| 7 | FNTA       | nonsynonymous SNV | c.A63C   | p.Q21H   | EAAQGGEPGQPAQPPQPHPPPPQQ   | EAAQGGEPGQPAHPPQPHPPPPQQ  |
| 7 | FRG1B      | nonsynonymous SNV | c.A163G  | p.N55D   | VFQNGKMALLASNSCFIRCNEAGDI  | VFQNGKMALLASDSCFIRCNEAGDI |
| 7 | FRG1B      | nonsynonymous SNV | c.A19G   | p.N7D    | MALLASNSCFIRCNEAGDIEAKSKT  | MALLASDSCFIRCNEAGDI       |
| 7 | FRG2B      | nonsynonymous SNV | c.C463T  | p.R155C  | AHHRGRSRACTGRSKRHRSRALGVQ  | AHHRGRSRACTGCSKRHRSRALGVQ |
| 7 | FRMPD4     | nonsynonymous SNV | c.C2629A | p.Q877K  | LGALEALSVSEEQQTSDNSGVAILR  | LGALEALSVSEEKQTSNSGVAILR  |
| 7 | FTH1       | nonsynonymous SNV | c.G46T   | p.D16Y   | ASTSQVRQNYHQDSEAAINRQINLE  | ASTSQVRQNYHQYSEAAINRQINLE |
| 7 | GAREML     | nonsynonymous SNV | c.C1099T | p.P367S  | LWAHQGPEGLVRPPGLDLISFGAA   | LWAHQGPEGLVRSPGLDLISFGAA  |
| 7 | GATA1      | nonsynonymous SNV | c.C919A  | p.R307S  | LTMRKDGQTRNRKASGKGKKKRGGS  | LTMRKDGQTRNSKASGKGKKKRGGS |

|    |           |                   |           |          |                            |                            |
|----|-----------|-------------------|-----------|----------|----------------------------|----------------------------|
| 7  | GDPD2     | nonsynonymous SNV | c.G160A   | p.A54T   | KVLLLLIMLLVAAGLVGLDIQWQQE  | KVLLLLIMLLVATGLVGLDIQWQQE  |
| 7  | GID4      | nonsynonymous SNV | c.A137C   | p.H46P   | RRQRAGGRPSRPHPARARPGLSLPA  | RRQRAGGRPSRPPPARARPGLSLPA  |
| 8  | GOLGA6L2  | nonsynonymous SNV | c.C401A   | p.A134D  | GTPSSFNLALSQAFRGSPLGCVSTS  | GTPSSFNLALSQDFRGSPLGCVSTS  |
| 8  | GOLGA8K   | nonsynonymous SNV | c.G1702A  | p.A568T  | GPGAPAPQELGAADKHGDLREVSLT  | GPGAPAPQELGATDKHGDLESLT    |
| 8  | GOLGA8K   | nonsynonymous SNV | c.A1319G  | p.Q440R  | GEHLDSEGEAAPQPMPSVPEDLESR  | GEHLDSEGEAAPRPMPSVPEDLESR  |
| 8  | HCFC1     | nonsynonymous SNV | c.A1762C  | p.T588P  | IVKTMAVTPGTTTLPATVKVASSPV  | IVKTMAVTPGTTPLPATVKVASSPV  |
| 8  | HEBP2     | nonsynonymous SNV | c.G31A    | p.A11T   | MAEPLQPDPGAEDAAAQAVETPGW   | MAEPLQPDPGTAEDAAAQAVETP    |
| 8  | HLA-DQB2  | nonsynonymous SNV | c.G748A   | p.G250S  | IFLGLGLIIRHRGQKGRGPPPPAGN  | IFLGLGLIIRHRSQKGRGPPPPAGN  |
| 8  | HLA-DRB5  | nonsynonymous SNV | c.C165A   | p.F55L   | ECHFFNGTERVRFLLHRDIYNQEDL  | ECHFFNGTERVRLLRDIYNQEDL    |
| 8  | HS6ST1    | nonsynonymous SNV | c.C261A   | p.D87E   | LERSLRFDKMGDDVIVFLHIQKTGG  | LERSLRFDKMGDEVIVFLHIQKTGG  |
| 8  | HYDIN     | nonsynonymous SNV | c.C14623A | p.L4875M | TFSTECRMPDIALPSQFVVPANSEG  | TFSTECRMPDIAMPSQFVVPANSEG  |
| 8  | INSR      | nonsynonymous SNV | c.C37T    | p.P13S   | MATGGRRGAAAAPLLVAVAALLLGA  | MATGGRRGAAAASLLVAVAALLLGA  |
| 8  | KANK3     | nonsynonymous SNV | c.T1811C  | p.V604A  | SQAEPVARMLEGVRRLGPELLAHVV  | SQAEPVARMLEGARRLGPELLAHVV  |
| 8  | KRT18     | nonsynonymous SNV | c.G252A   | p.M84I   | AGMGGIQNEKETMQSLNDRLASLYD  | AGMGGIQNEKETIQSLNDRLASLYD  |
| 9  | KRTAP4-8  | nonsynonymous SNV | c.T283A   | p.C95S   | VCCQPTCCHPSCCISCCRPSCCVS   | VCCQPTCCHPSCSISCCRPSCCVS   |
| 9  | KRTAP9-8  | nonsynonymous SNV | c.T179C   | p.I60T   | RPTCCQNTCCQPICVTSCCQPSCCS  | RPTCCQNTCCQPTCVTSCCQPSCCS  |
| 9  | LILRB1    | nonsynonymous SNV | c.G955A   | p.A319T  | WSAPSDPLDILIAGQFYDRVLSVQ   | WSAPSDPLDILITGQFYDRVLSVQ   |
| 9  | LINC00273 | nonsynonymous SNV | c.G595C   | p.G199R  | LVSRSRGREDTRAGRGAQTGKARDRK | LVSRSRGREDTRARRGAQTGKARDRK |
| 9  | LINC00937 | nonsynonymous SNV | c.T443C   | p.V148A  | APGLRGRAGRAAVGQEGDRHPDRWR  | APGLRGRAGRAAAGQEGDRHPDRWR  |
| 9  | MCCC2     | nonsynonymous SNV | c.T115C   | p.S39P   | SVASLGTQPDLSALYQENYKQMKKA  | SVASLGTQPDLPALYQENYKQMKKA  |
| 9  | METTL9    | nonsynonymous SNV | c.G17A    | p.G6D    | MRLLAGWLCLSLASVWLARRMWTLR  | MRLRADWLCLSLASVWLA         |
| 9  | MROH5     | nonsynonymous SNV | c.T608G   | p.V203G  | NMLVAICRHSWRVVAQHLETLLTG   | NMLVAICRHSWRGVAQHLETLLTG   |
| 9  | MUC4 (1)  | nonsynonymous SNV | c.A12607T | p.T4203S | TPLPVTDTSSASTGHATPLPVTDT   | TPLPVTDTSSASSGHATPLPVTDT   |
| 9  | MUC4 (2)  | nonsynonymous SNV | c.T10634C | p.V3545A | HATPLPVTSLSSVSTGDTTPLPVT   | HATPLPVTSLSSASTGDTTPLPVT   |
| 9  | MUC4 (3)  | nonsynonymous SNV | c.T8810C  | p.V2937A | QATPLPVTSLSSVSTGDTTPLPVT   | QATPLPVTSLSSASTGDTTPLPVT   |
| 9  | MUC4 (4)  | nonsynonymous SNV | c.T8572C  | p.S2858P | TTPLPVTDASSVSTGHATSLPVTDA  | TTPLPVTDASSVPTGHATSLPVTDA  |
| 10 | MUC4      | nonsynonymous SNV | c.C6554T  | p.A2185V | HATSLPVTDTSSASTGHATPLPVT   | HATSLPVTDTSSVSTGHATPLPVT   |
| 10 | MUC4      | nonsynonymous SNV | c.C6506T  | p.A2169V | HATSLPVTDTSSASTGHATSLPVT   | HATSLPVTDTSSVSTGHATSLPVT   |

|    |           |                   |          |          |                            |                            |
|----|-----------|-------------------|----------|----------|----------------------------|----------------------------|
| 10 | MUC4      | nonsynonymous SNV | c.C5056A | p.L1686I | STGHATPLPVTGLSSATDDTTRLP   | STGHATPLPVTGISSATDDTTRLP   |
| 10 | MYH1      | nonsynonymous SNV | c.G3718C | p.E1240Q | MKMEIDDLASNMETVSKAKGNLEKM  | MKMEIDDLASNMQTVSKAKGNLEKM  |
| 10 | NBPF1     | nonsynonymous SNV | c.G3030T | p.E1010D | LGQPYRSAYVYSLEEYQLGLALDVDR | LGQPYRSAYVYSLDEYQLGLALDVDR |
| 10 | NBPF1     | nonsynonymous SNV | c.A2936T | p.Q979L  | RELLDEKEPEVLQDSLDRCYSTPSG  | RELLDEKEPEVLLDSLDRCYSTPSG  |
| 10 | NBPF14    | nonsynonymous SNV | c.A323G  | p.Q108R  | DEDVQVEEAQKVKSSAPREVQKTE   | DEDVQVEEAQKVRKSSAPREVQKTE  |
| 10 | NBPF8     | nonsynonymous SNV | c.A548G  | p.Q183R  | DEDVQVEEAEKVKSSAPREVQKAE   | DEDVQVEEAEKVRKSSAPREVQKAE  |
| 10 | NCOA4     | nonsynonymous SNV | c.G709A  | p.V237M  | VQNHQDPCKVEEVCANRANPCTSAE  | VQNHQDPCKVEEMCRANRANPCTSAE |
| 10 | NEK2      | nonsynonymous SNV | c.A37G   | p.T13A   | MPSRAEDYEVLYTIGTGSYGRQKI   | MPSRAEDYEVLYAIGTGSYGRQKI   |
| 10 | NHS       | nonsynonymous SNV | c.C155T  | p.P52L   | PPGRRDLDEVEAPGPEEPARAVPAP  | PPGRRDLDEVEALGPEEPARAVPAP  |
| 10 | OR4F15    | nonsynonymous SNV | c.C919T  | p.H307Y  | KVAMRRLCSRLAHFTKIL         | KVAMRRLCSRLAYFTKIL         |
| 11 | OR4K15    | nonsynonymous SNV | c.G682T  | p.G228C  | TYVVSLIVADSGFLSLSSFLLVV    | TYVVSLIVADSCFLSLSSFLLVV    |
| 11 | PAN3-AS1  | nonsynonymous SNV | c.A298G  | p.T100A  | SSSAAARGAAAATTIDGGGKEDAAG  | SSSAAARGAAAAATTIDGGGKEDAAG |
| 11 | PCDHB7    | nonsynonymous SNV | c.C1744T | p.P582S  | APCTEPLPRAAEPGYLVTKVAVDG   | APCTEPLPRAAESGYLVTKVAVDG   |
| 11 | PCMTD1    | nonsynonymous SNV | c.G440C  | p.R147T  | AMKPEEPPQNLREKIMKLPESL     | AMKPEEPPQNLTEKIMKLPESL     |
| 11 | PCNT      | nonsynonymous SNV | c.A3758G | p.Q1253R | HRLVLELESRRRLQQAQEAALR     | HRLVLELESRRRLQQAQEAALR     |
| 11 | PGAM4     | nonsynonymous SNV | c.G719T  | p.C240F  | KPMQFLGDEETVCKAIEAVAAQGA   | KPMQFLGDEETVFKAIEAVAAQGA   |
| 11 | PGC       | nonsynonymous SNV | c.T2A    | p.MIK    | MKWMVVVLVCLQLLEAAVVKVPLKK  | KKWMVVVLVCLQL              |
| 11 | PLEKHA4   | nonsynonymous SNV | c.G740C  | p.R247P  | PLSRPPSLSLPRPSAPARRPPAP    | PLSRPPSLSLPPRSAPARRPPAP    |
| 11 | POM121    | nonsynonymous SNV | c.T2266C | p.Y756H  | PAPPSMIKVVPAVPTPIHPIFGGA   | PAPPSMIKVVPAHVPTPIHPIFGGA  |
| 11 | POTEM     | nonsynonymous SNV | c.C280A  | p.L94I   | TSGDHDDSAMKTLRSKMGKWCCHCF  | TSGDHDDSAMKTIRSKMGKWCCHCF  |
| 11 | pp8961    | nonsynonymous SNV | c.G419T  | p.G140V  | SVSGGADAVPLEGAPAVRSKS      | SVSGGADAVPLEVAPAVRSKS      |
| 11 | PRB2      | nonsynonymous SNV | c.G326A  | p.R109Q  | KPQGPPQGDKSRSPRPPGKQGP     | KPQGPPQGDKSQSPRPPGKQGP     |
| 12 | PRB3      | nonsynonymous SNV | c.C562T  | p.P188S  | PPHPGKPEGPPQGGNQSQGP       | PPHPGKPEGPPSQQGGNQSQGP     |
| 12 | RAB3GAP1  | nonsynonymous SNV | c.G2126A | p.G709D  | SCLLEQPEVLVTGAGRGHAGRIHK   | SCLLEQPEVLVTDAGRGHAGRIHK   |
| 12 | RAB40A    | nonsynonymous SNV | c.T458C  | p.F153S  | AQAYAERLGVTFEVSPLCNFNIE    | AQAYAERLGVTFEVSPLCNFNIE    |
| 12 | RAD21-AS1 | nonsynonymous SNV | c.C115T  | p.P39S   | VPVRLRSQKPPPPRRSGAGAMTI    | VPVRLRSQKPPSPPRRSGAGAMTI   |
| 12 | RARG      | nonsynonymous SNV | c.T25C   | p.C9R    | MLALPLPPCWSGAPPGEESAAAGP   | MLALPLPPRWSGAPPGEES        |
| 12 | RPL23AP32 | nonsynonymous SNV | c.C139G  | p.Q47E   | HKKKKIRMSPTFQRPKTLRLWRPPR  | HKKKKIRMSPTFERPKTLRLWRPPR  |

|    |          |                   |          |          |                            |                           |
|----|----------|-------------------|----------|----------|----------------------------|---------------------------|
| 12 | RPL30    | nonsynonymous SNV | c.A268G  | p.K90E   | SQVQAILLPQPPK              | SQVQAILLPQPE              |
| 12 | RPS14P3  | nonsynonymous SNV | c.T422G  | p.L141R  | IEDVTPIPSDSTLRKGVTVVAVCEQ  | IEDVTPIPSDSTRRKGVTVVAVCEQ |
| 12 | RPS15    | nonsynonymous SNV | c.G140C  | p.R47P   | QLYSARQRRRLNRGLRRKQHSLLKR  | QLYSARQRRRLNPGLRRKQHSLLKR |
| 12 | RTL1     | nonsynonymous SNV | c.G3836C | p.R1279P | APPSHTAATHPPPRHLMDPQVLEF   | APPSHTAATHPPPRHLMDPQVLEF  |
| 12 | SFPQ     | nonsynonymous SNV | c.G400A  | p.A134T  | GSAPPASSSAPPATPPTSGAPPGSG  | GSAPPASSAPPTTPPTSGAPPGSG  |
| 12 | SLC34A3  | nonsynonymous SNV | c.C1367A | p.A456D  | LQVALIHFFFNLAGILLWYLVPALR  | LQVALIHFFFNLDGILLWYLVPALR |
| 13 | SPDYE1   | nonsynonymous SNV | c.G1001A | p.R334H  | DPEHWVWARDRARLS            | DPEHWVWARDRAHLS           |
| 13 | SPDYE3   | nonsynonymous SNV | c.C1018A | p.L340I  | APGVDPSPPRRSLGCKRKRECLDES  | APGVDPSPPRRSIGCKRKRECLDES |
| 13 | SPEN     | nonsynonymous SNV | c.A9613C | p.T3205P | AKTPDAKAAPTTPAPVVPVPLPA    | AKTPDAKAAPTPPAPVVPVPLPA   |
| 13 | SREBF1   | nonsynonymous SNV | c.C2903A | p.A968D  | LATTPASSSIDKAVQLFLCDLLLVV  | LATTPASSIDKDVQLFLCDLLLVV  |
| 13 | SUB1     | nonsynonymous SNV | c.G167A  | p.S56N   | ETSRALSSSKQSSSRDDNMFQIGK   | ETSRALSSSKQSNSSRDDNMFQIGK |
| 13 | THAP7    | nonsynonymous SNV | c.C61A   | p.R21S   | GCCTRDTRERNRGISFHRLPKKDN   | GCCTRDTRERNSGISFHRLPKKDN  |
| 13 | TLE2     | nonsynonymous SNV | c.A664C  | p.T222P  | KSCDSSPPQDASTPGPSSASHLCQL  | KSCDSSPPQDASPPGPSSASHLCQL |
| 13 | TMEM184A | nonsynonymous SNV | c.A383T  | p.E128V  | YYVYFDSVRDCYEAFFVIYSFLSLCF | YYVYFDSVRDCYVAFVIYSFLSLCF |
| 13 | TPSD1    | nonsynonymous SNV | c.A65G   | p.E22G   | HPQWVLTAAHCEVPVQLREHLYYQ   | HPQWVLTAAHCVGPVQLREHLYYQ  |
| 13 | TPSD1    | nonsynonymous SNV | c.A251G  | p.E84G   | HPQWVLTAAHCEVPDIKDLAALRVQ  | HPQWVLTAAHCVGPDIKDLAALRVQ |
| 13 | TTBK1    | nonsynonymous SNV | c.G1402A | p.A468T  | VAAQQPASRSHGAAPALDTAITSSR  | VAAQQPASRSHGTAPALDTAITSSR |
| 13 | TTBK1    | nonsynonymous SNV | c.G3538A | p.A1180T | VAAQQPASRSHGAAPALDTAITSRL  | VAAQQPASRSHGTAPALDTAITSRL |
| 14 | TUBB4Q   | nonsynonymous SNV | c.G313C  | p.G105R  | CLQGFQLTHSLGGGTGSGMGTLIS   | CLQGFQLTHSLGRGTGSGMGTLIS  |
| 14 | UGT1A3   | nonsynonymous SNV | c.G775C  | p.G259R  | DILSHASVWLFRRDFVMDYPRPIMP  | DILSHASVWLFRRDFVMDYPRPIMP |
| 14 | UGT1A3   | nonsynonymous SNV | c.A850G  | p.R284G  | NMVFINGINCANRKLPSQEFAYIN   | NMVFINGINCANGKPLSQEFAYIN  |
| 14 | UQCRC2   | nonsynonymous SNV | c.G23A   | p.G8D    | MKLLTRAGSFSRFYSLKVAP       | MKLLTRADSFYSLKVAP         |
| 14 | USP32    | nonsynonymous SNV | c.G2149T | p.A717S  | KDMSWPEEMSFISNSSKIDRHKVPT  | KDMSWPEEMSFISNSSKIDRHKVPT |
| 14 | USP35    | nonsynonymous SNV | c.T515A  | p.L172H  | HRLLCQQLVRCGRFRCPAEGEEG    | HRLLCQQLVRCGRFRCPAEGEEG   |
| 14 | WASH3P   | nonsynonymous SNV | c.C571A  | p.Q191K  | LRSMKEREKLEKKQKEQEVVRSQ    | LRSMKEREKLEKKKQKEQEVVRSQ  |
| 14 | X97876   | nonsynonymous SNV | c.A146C  | p.E49A   | FINSESVGNNTRELFPDGDGSCQWS  | FINSESVGNNTRELFPDGDGSCQWS |
| 14 | XRCC1    | nonsynonymous SNV | c.C1292A | p.P431Q  | KPPTPEETKAASQVLQEDIDIEGVQ  | KPPTPEETKAASQVLQEDIDIEGVQ |
| 14 | ZC3H11A  | nonsynonymous SNV | c.C1650A | p.D550E  | EAKEASGETTGVDITKIQVKRCETM  | EAKEASGETTGEITKIQVKRCETM  |

|    |          |                   |                                              |                                    |                                                   |                                                    |
|----|----------|-------------------|----------------------------------------------|------------------------------------|---------------------------------------------------|----------------------------------------------------|
| 14 | ZNF100   | nonsynonymous SNV | c.C1439A                                     | p.T480N                            | RSSQLTAHKMIHTGEKPYKCEECGK                         | RSSQLTAHKMIHNGEKPYKCEECGK                          |
| 14 | ZNF107   | nonsynonymous SNV | c.A1135G                                     | p.T379A                            | QSSNLTEHKKIHTAEKSYKCEECGK                         | QSSNLTEHKKIHAAEKSYKCEECGK                          |
| 15 | ZNF181   | nonsynonymous SNV | c.T692A                                      | p.I231N                            | LISHSGEKPYKCIIECGKAFSHVSSL                        | LISHSGEKPYKCEECGKAFSHVSSL                          |
| 15 | ZNF181   | nonsynonymous SNV | c.G785T                                      | p.G262V                            | HTGEKPYECMNCGKSFVSHLIEH                           | HTGEKPYECMNCVKSFSRVSHLIEH                          |
| 15 | ZNF34    | nonsynonymous SNV | c.C325A                                      | p.L109M                            | VLDVQGTSGKEHLRVNSPALGTRTE                         | VLDVQGTSGKEHMRVNSPALGTRTE                          |
| 15 | ZNF429   | nonsynonymous SNV | c.T1876C                                     | p.C626R                            | IHTREKPYKCEECAKAFTRSSRLTQ                         | IHTREKPYKCEERAKAFTRSSRLTQ                          |
| 15 | ZNF43    | nonsynonymous SNV | c.G820A                                      | p.E274K                            | STLTKHKRIHTGEKPYTCEECGKAF                         | STLTKHKRIHTGKKPYTCEECGKAF                          |
| 15 | ZNF430   | nonsynonymous SNV | c.A1303G                                     | p.K435E                            | TGEKPYKCEQCCKAFNESSNLTAHK                         | TGEKPYKCEQCCEAFNESSNLTAHK                          |
| 15 | ZNF676   | nonsynonymous SNV | c.C1317G                                     | p.H439Q                            | GKAFSWSSSLTEHKRIHAGEKPYKC                         | GKAFSWSSSLTEQKRIHAGEKPYKC                          |
| 15 | ZNF681   | nonsynonymous SNV | c.A14T                                       | p.K5I                              | MEPLKFRDVAIEFSLEEWQCLDTIQ                         | MEPLIFRDVAIEFSLEE                                  |
| 15 | ZNF746   | nonsynonymous SNV | c.G118A                                      | p.G40R                             | QAARLLSLEGRGTMAEKKLADCEKT                         | QAARLLSLEGRTRMAEKKLADCEKT                          |
| 15 | ZP3      | nonsynonymous SNV | c.G580A                                      | p.V194I                            | SRNMIYITCHLKVTLAEQDPDELNK                         | SRNMIYITCHLKITLAEQDPDELNK                          |
| 15 | ARMCX4   | nonsynonymous SNV | c.G5440C;<br>c.A5465G                        | p.G1814R<br>p.E1822G               | YMGSCVGAEEAGAGAEAGAGAEAGAG                        | YMGSCVGAEEAGARAEAGAGAGAGAGAEAGAE                   |
| 15 | BC101079 | nonsynonymous SNV | c.T476C<br>c.T479G                           | p.L159P p.L160R                    | RHSGATRCCFSELLSNLHSLGNKKT                         | RHSGATRCCFSEPRSNLHSLGNKKT                          |
| 16 | DUX2     | nonsynonymous SNV | c.C524T<br>c.G550A<br>c.G555T                | p.P175L p.G184S<br>p.E185D         | LCSAAPGGGHPAPSWVAFHAHTGEWGTGL<br>PAPHVPC          | LCSAAPGGGHPALSWVAFHAHTSDWGTGLPAPHVPC               |
| 16 | DUX4L4   | nonsynonymous SNV | c.C1063A                                     | p.Q355K                            | RQQMQGIPAPSQALQEPAPWSALP                          | RQQMQGIPAPSKALQEPAPWSALP                           |
| 16 | ZNF66    | nonsynonymous SNV | c.G1110T<br>c.C1127G                         | p.W370C p.T376R                    | PYKCEECGKAFNWSSHLTTHKRIHTGEK<br>YK                | PYKCEECGKAFNCSSHLTRHKRIHTGEKPYK                    |
| 16 | ZNF724   | nonsynonymous SNV | c.A1043G<br>c.C1057G<br>c.A1075G<br>c.G1105A | p.N348S p.L353V<br>p.I359V p.E369K | KPYKCEECGKAFNVSSLTQHKRIHTGEK<br>PYKCEECGKAFNVSSLT | KPYKCEECGKAFVSSSTVTQHKRVHTGEKPYKCKEKGKAF<br>NVSSLT |
| 16 | FAM182B  | nonsynonymous SNV | c.G85A<br>c.A88G                             | p.G29R p.I30V                      | WMWNVEEEEHEVGICTWGGQHCPCPA                        | WMWNVEEEEHEVRVCTWGGQHCPCPA                         |
| 16 | FAM182B  | nonsynonymous SNV | c.T394G<br>c.G431C                           | p.W132G p.G144A                    | QAAVSDASLGPESWQEGCRPGLTSGQHG<br>GRDGR             | QAAVSDASLGPESWQEGCRPGLTSAQHGGRDGR                  |
| 16 | DUX4L4   | nonsynonymous SNV | c.C880A<br>c.T896A<br>c.C923A<br>c.T928G     | p.Q294K p.L299H<br>p.P308Q p.W310G | AVAQPGPAQAGPQGGVLPPTSQGSQW<br>WGWGRGPQVAGAA       | AVAQPGPAQAGPKQGGVHAPPTSQGSQWGWGRGPQVAG<br>AA       |
| 16 | HNRNPL   | nonsynonymous SNV | c.A224C<br>c.T230C                           | p.H75P p.L77P                      | AQVATAPSMGTPHPLPHPSMALTPTA                        | AQVATAPSMGTPPPPHPSMALTPTA                          |
| 16 | ICOSLG   | nonsynonymous SNV | c.A1240G<br>c.A1253G<br>c.T1255C             | p.M414V p.E418G<br>p.W419R         | VQGGSRHRRPAPMGCEVWQAPAPSPRG<br>VS                 | VQGGSRHRRPAPVGCPRVQAPAPSPRGVS                      |

|    |                  |                        |                                                                                  |                                                                  |                                                         |                                                                                                                                                                                                                                                                                    |
|----|------------------|------------------------|----------------------------------------------------------------------------------|------------------------------------------------------------------|---------------------------------------------------------|------------------------------------------------------------------------------------------------------------------------------------------------------------------------------------------------------------------------------------------------------------------------------------|
| 17 | LINC00273        | nonsynonymous SNV      | c.G1049T<br>c.G1063A<br>c.C1067T<br>c.C1070T<br>c.C1091A                         | p.G350V p.G355R<br>p.T356M p.P357L<br>p.A364E                    | RGAGGEPARSGAGHAPDGTPTGTATARAA<br>SQPLGRRPGPA            | RGAGGEPARSGAVHAPDRMLGTATAREASQPLGRRPGPA                                                                                                                                                                                                                                            |
| 17 | LOC440563        | nonsynonymous SNV      | c.G624T<br>c.A625T<br>c.A635G                                                    | p.Q208H p.S209C<br>p.E212G                                       | SLENLEKIEKEQSKQEVEVKNAKSEEEQ                            | SLENLEKIEKEHCKQGVEVKNAKSEEEQ                                                                                                                                                                                                                                                       |
| 17 | LOC729732        | nonsynonymous SNV      | c.C146T<br>c.C160A                                                               | p.A49V p.R54S                                                    | GPGHGQGTATSWARTGERGAGPGPACPR<br>CA                      | GPGHGQGTATSWVRTGESGAGPGPACPRCA                                                                                                                                                                                                                                                     |
| 17 | LOC100132<br>831 | nonsynonymous SNV      | c.G85C<br>c.A89C                                                                 | p.A29P p.H30P                                                    | VLMRRSMAEGEPAHPASDVLCSLAN                               | VLMRRSMAEGEPPPPASDVLCSLAN                                                                                                                                                                                                                                                          |
| 17 | LOC100288<br>255 | nonsynonymous SNV      | c.G303C<br>c.C329G                                                               | p.M101I p.T110R                                                  | SSSYRENCRKRKMSKDCQDTAGNCEPEK<br>ECCLS                   | SSSYRENCRKRKISSKDCQDRAGNCEPEKCSLS                                                                                                                                                                                                                                                  |
| 17 | MUC4             | nonsynonymous SNV      | c.G10847C<br>c.A10864G                                                           | p.R3616P<br>p.T3622A                                             | TDTSSASTGDTTRLPVTDTSASTGQATPL<br>P                      | TDTSSASTGDTTLPVTDASSASTGQATPLP                                                                                                                                                                                                                                                     |
| 17 | USP17L11         | nonsynonymous SNV      | c.T85G<br>c.G101A<br>c.C104G                                                     | p.F29V p.R34Q<br>p.T35S                                          | FSKLTSSRPDAFAEIQRTSLPEKSPLSCET                          | FSKLTSSRPDAVAEIQSSLPEKSPLSCET                                                                                                                                                                                                                                                      |
| 17 | ZNF737           | nonsynonymous SNV      | c.A1153G<br>c.A1156G<br>c.A1192C<br>c.G1210A<br>c.T1217A<br>c.A1223G<br>c.T1231G | p.T385A p.T386A<br>p.K398Q p.E404K<br>p.F406Y p.Y408C<br>p.S411A | ECGKAFNWSSHLTTHKRIHTGEKPYKCEE<br>CGEAFKYSSSLTTHKIIHTGQQ | ECGKAFNWSSHLAAHKRIHTGEKPYQCEECGKAYKCSSALT<br>THKIIHTGQQ                                                                                                                                                                                                                            |
| 17 | FANCD2           | frameshift deletion    | c.1278_1278del                                                                   | p.426_426del                                                     | EQLLQSTFSVHYLVLKDMCSSILSL                               | EQLLQSTFSVHYFLRICVHPFCRWLRVCFTL                                                                                                                                                                                                                                                    |
| 18 | PLA2G2C          | frameshift deletion    | c.26delT                                                                         | p.L9fs                                                           | MKVIAILTLFLCSPHSSFW                                     | MKVIAILTPSSAPPTAVSGSFRGGSNTSRGEVPSHITDMA<br>ATVGLGKIGSPWMTLTGTAPHLPLPTRSS                                                                                                                                                                                                          |
| 18 | RUNX1-IT1        | frameshift deletion    | c.186_187del                                                                     | p.62_63del                                                       | LSGEIKVSLSLSLYLTHHTHTHTH                                | LSGEIKVSLSLSLSHHTHTHTHTHREREREREREREASIQ<br>NSHA                                                                                                                                                                                                                                   |
| 18 | HGC6.3           | frameshift deletion    | c.404delT                                                                        | p.F135fs                                                         | HTAGVMTPTASSFPTHCRGNPCHL                                | HTAGVMTPTASSPHTAGGMTPTAFSSPNTAGGMTPTASCS<br>PHTHCRGSGA                                                                                                                                                                                                                             |
| 18 | RPS14P3          | frameshift insertion   | c.429dupG                                                                        | p.K143fs                                                         | DVTPIPSDSTLRKGVTVVAVCEQDS                               | DVTPIPSDSTLRKGGHRGRRL                                                                                                                                                                                                                                                              |
| 18 | KRT18            | frameshift insertion   | c.174_175ins<br>A                                                                | p.M58fs                                                          | ISVSRSTFRGGMGSGGLATGIAGG                                | ISVSRSTFRGGMRVRGPGHRDSRGSGRNHRPEREGDHAK<br>PERPPGLPGQSEEPGDREPEAGEQNPALGEEGTPGQRLEP<br>LLQDHRGPEGSDLRKYCGQCPHRSAD                                                                                                                                                                  |
| 18 | FAM182B          | frameshift insertion   | c.446_447ins<br>GCCG                                                             | p.R149fs                                                         | CRPGLTSGQHGGRRDR                                        | CRPGLTSGQHGGRRPWKVA                                                                                                                                                                                                                                                                |
| 19 | ADRA2C           | frameshift insertion   | c.48dupG                                                                         | p.A16fs                                                          | PALAAALAVAAAAGPNASGAGERGS                               | PALAAALAVAAAAGPQCERRREGQRRCQCLGGFLGAAA<br>RPVLGGRGGRAGCRGGLPHRLHRGQQRAGGDRRADQPGA<br>ARATEPLPGVAGLGRHPGGHAGHALLVQRAHGLLVLRAG<br>VRRRVPGARCAVLHLVDRASVCHQGPLLVGDAGRVRQPE<br>AHTTPRQGHHRGRVAHLGRHLLPAAGLALPPARRRRLPAV<br>RPQRRDLVHPVLLHRLLLRALPHHGPLRAHLPSGQAAHAH<br>AQREARPRGPRRCVP |
| 19 | LINC00273        | nonframeshift deletion | c.1024_1050del                                                                   | p.342_350del                                                     | CRHRLLLLRGAGGEPARSGAGHAPD                               | CRHRLLLLRGAGHAPDGTPTGTATAR                                                                                                                                                                                                                                                         |



|    |         |                         |                     |                |                           |                                                                                                                   |
|----|---------|-------------------------|---------------------|----------------|---------------------------|-------------------------------------------------------------------------------------------------------------------|
| 20 | TMEM181 | frameshift insertion    | c.43dupG            | p.G14fs        | GAAPSPTQASSRGGGPGPPAPTRAV | GAAPSPTQASSRGGGAGSPSPHPRRVQLLACSRRRSPERTGSE<br>SCAPPHLLPRTCSSSSVPPSAPAARSVVLGEERGRRRRHKGW<br>SGGTGTREAAARHGRRVPCL |
| 20 | ZNF91   | nonframeshift insertion | c.898_899ins<br>AAT | p.S300delinsKC | KPYKCEECGKAFFRSSTLAKHKRIH | KPYKCEECGKAFFCRSSTLAKHKRIH                                                                                        |

### Patient #3

| TMG | Gene name | Mutation type       | cDNA change    | Amino acid change | Wild type minigene sequence | Mutated minigene sequence   |
|-----|-----------|---------------------|----------------|-------------------|-----------------------------|-----------------------------|
| 1   | AACS      | nonsynonymous SNV   | c.C1354A       | p.L452I           | DIISCFMGHNFSLPVYKGEIQARNL   | DIISCFMGHNFSPVYKGEIQARNL    |
| 1   | ADARB2    | nonsynonymous SNV   | c.G703A        | p.G235R           | LFQEFEPAPRPLAGGRPGDAALL     | LFQEFEPAPRPLAGGRPGDAALL     |
| 1   | AK302451  | nonsynonymous SNV   | c.A442T        | p.T148S           | QSSRTSSTCSCQTSRTSSTSCSYQS   | QSSRTSSTCSCQSSRTSSTSCSYQS   |
| 1   | AK302451  | nonsynonymous SNV   | c.A139T        | p.T47S            | QTSSTCSCQSSGTSSTSCNWQSSRI   | QTSSTCSCQSSGSSSTSCNWQSSRI   |
| 1   | ALPK1     | nonsynonymous SNV   | c.A332G        | p.K111R           | ATGTWLYRNE SDKVLVQSVCIQIRG  | ATGTWLYRNE SDRVLVQSVCIQIRG  |
| 1   | ANKRD30A  | nonsynonymous SNV   | c.C688A        | p.P230T           | EGTSAGTPDEAAPLAERTPDTAESL   | EGTSAGTPDEAATLAERTPDTAESL   |
| 1   | ANXA13    | nonsynonymous SNV   | c.A521G        | p.D174G           | EGDDVDKDLAQDAKDLYDAGEGRW    | EGDDVDKDLAQGAKDLYDAGEGRW    |
| 1   | ARHGAP5   | frameshift deletion | c.1630_1633del | p.K544fs          | QKLAPDRESLLK HIGFVYHPTKET   | QKLAPDRESLLI                |
| 1   | ARHGEF18  | nonsynonymous SNV   | c.C3047A       | p.P1016H          | AERPEVARRDSAPTENRLAKSDVPI   | AERPEVARRDSAHTENRLAKSDVPI   |
| 1   | ARL13A    | frameshift deletion | c.84delC       | p.G28fs           | EETRRNVTIPII GLNNSGKTVLVEA  | EETRRNVTIPIIG               |
| 1   | ARMCX4    | nonsynonymous SNV   | c.G2435C       | p.W812S           | TLPGAKNKVRGNWNAVSKAGAGMDT   | TLPGAKNKVRGNSNAVSKAGAGMDT   |
| 1   | ARMCX4    | nonsynonymous SNV   | c.A2894T       | p.K965I           | VASFQGEVLP GAKNKVRGNSNAVPK  | VASFQGEVLP GAINKVRGNSNAVPK  |
| 2   | ARMCX4    | nonsynonymous SNV   | c.T3887G       | p.V1296G          | GNMSSVSYWAGVVDQAGGGSWAGTS   | GNMSSVSYWAGVGDQAGGGSWAGTS   |
| 2   | ARMCX4    | nonsynonymous SNV   | c.G2436C       | p.W812C           | TLPGAKNKVRGNWNAVSKAGAGMDT   | TLPGAKNKVRGNCAVSKAGAGMDT    |
| 2   | ASAH2     | nonsynonymous SNV   | c.T17A         | p.F6Y             | MAKRTFSNLETFLIFLLV          | MAKRTYSNLETFLIFLLV          |
| 2   | ASAP1     | nonsynonymous SNV   | c.C2964A       | p.D988E           | QLSDLPPKPQMKDLPPKPQLGDLLA   | QLSDLPPKPQMKELPPKPQLGDLLA   |
| 2   | ASF1B     | nonsynonymous SNV   | c.C367T        | p.R123C           | YYVNNEYLNPELRENPPMKPDFSQL   | YYVNNEYLNPELCENPPMKPDFSQL   |
| 2   | ASPM      | nonsynonymous SNV   | c.G2542A       | p.A848T           | ISLEDNSDVTGLAMFILNRLWNPD    | ISLEDNSDVTGLTMFILNRLWNPD    |
| 2   | ZNF98     | nonsynonymous SNV   | c.G724C        | p.E242Q           | RIHTGKKPYKCEECGKAFNRLSHLT   | RIHTGKKPYKCEQCGKAFNRLSHLT   |
| 2   | AX746755  | nonsynonymous SNV   | c.C546G        | p.I182M           | VLHTFFLSPAGIILACTILLTFFLS   | VLHTFFLSPAGIMLACTILLTFFLS   |
| 2   | AX747493  | nonsynonymous SNV   | c.T131A        | p.F44Y            | LAQQGPQHDPMAFPSTQSTCSSGGV   | LAQQGPQHDPMAYPSTQSTCSSGGV   |
| 2   | AX747493  | nonsynonymous SNV   | c.T167A        | p.V56D            | FPSTQSTCSSGGVPEMSLAQQAQAFQY | FPSTQSTCSSGGDPEMSLAQQAQAFQY |
| 2   | AX747493  | nonsynonymous SNV   | c.T202A        | p.Y68N            | VPMSLAQQAQAFQYQPVAFSTQSTS   | VPMSLAQQAQAFQNPVAFSTQSTS    |
| 2   | AX747985  | nonsynonymous SNV   | c.T170A        | p.L57Q            | PNPTSSTESLGYLSSLSQPEPL      | PNPTSSTESLGYQSSLSQPEPL      |
| 3   | AXL       | nonsynonymous SNV   | c.C162A        | p.H54Q            | ACTSSQGPSSWTHWLPVETPEGVPL   | ACTSSQGPSSWTQWLPVETPEGVPL   |
| 3   | C2CD2L    | nonsynonymous SNV   | c.A134G        | p.D45G            | YARGLWLARARGDRGPGPALAGEPA   | YARGLWLARARGGRGPGPALAGEPA   |

|   |           |                   |          |          |                            |                            |
|---|-----------|-------------------|----------|----------|----------------------------|----------------------------|
| 3 | C2orf16   | nonsynonymous SNV | c.G4988T | p.R1663L | ERSHRSPERSHRSSSERRHRSPSQ   | ERSHRSPERSHLSSSERRHRSPSQ   |
| 3 | C2orf16   | nonsynonymous SNV | c.G5012T | p.R1671L | ERSHRSSERRHRSPSQRSHRGPSE   | ERSHRSSERRHLSPSQRSHRGPSE   |
| 3 | CAD       | nonsynonymous SNV | c.C4810G | p.Q1604E | EQQTVAAVLMVAQLTQRSVHICHVA  | EQQTVAAVLMVAELTQRSVHICHVA  |
| 3 | CAMSAP3   | nonsynonymous SNV | c.C362G  | p.P121R  | ARRGTVPALPERPVREADLRHQPIIL | ARRGTVPALPERRVREADLRHQPIIL |
| 3 | CCDC106   | nonsynonymous SNV | c.C374G  | p.A125G  | GPRRMEGDSRGGAGGEASDPESAAS  | GPRRMEGDSRGGGGGEASDPESAAS  |
| 3 | CCDC112   | nonsynonymous SNV | c.A79C   | p.T27P   | AVAGAVAGAGAATGTGVGATPAPQQ  | AVAGAVAGAGAAPGTGVGATPAPQQ  |
| 3 | CCDC17    | nonsynonymous SNV | c.C461T  | p.A154V  | FRTRARRVAEMEAQSRALQLRGEEL  | FRTRARRVAEMEVQSRALQLRGEEL  |
| 3 | CCNB3     | nonsynonymous SNV | c.C2516G | p.T839S  | FKEPLALQEEPSTEKEAVLKEPSVD  | FKEPLALQEEPSSEKEAVLKEPSVD  |
| 3 | CCND1     | nonsynonymous SNV | c.G58A   | p.A20T   | CEVETIRRAYPDANLLNDRVLRAML  | CEVETIRRAYPDTNLLNDRVLRAML  |
| 3 | CDH22     | nonsynonymous SNV | c.G1168A | p.E390K  | QAIVRVAVTDVDEPPEFRPPSGLLE  | QAIVRVAVTDVDKPEFRPPSGLLE   |
| 4 | COL11A1   | nonsynonymous SNV | c.C1648G | p.P550A  | LGPRGTPGAPGQPGMAGVDGPPGPK  | LGPRGTPGAPGQAGMAGVDGPPGPK  |
| 4 | COL1A1    | nonsynonymous SNV | c.C3023T | p.P1008L | PPGPMGPPGLAGPPGESGREGAPGA  | PPGPMGPPGLAGLPGESGREGAPGA  |
| 4 | COL6A5    | nonsynonymous SNV | c.A671T  | p.H224L  | YKEGAVDADMVQVHFPISCQKDSLAD | YKEGAVDADMVQLFPISCQKDSLAD  |
| 4 | CRLF1     | nonsynonymous SNV | c.G214A  | p.E72K   | CSVHGDPPGATAEGLYWTLNGRRLP  | CSVHGDPPGATAKGLYWTLNGRRLP  |
| 4 | CYLC2     | nonsynonymous SNV | c.C519A  | p.D173E  | SKKGKKDAEKGDATESEDEKGGGA   | SKKGKKDAEKGKESATESEDEKGGGA |
| 4 | CYP2D6    | nonsynonymous SNV | c.G955A  | p.V319I  | AVIHEVQRFGDIVPLGVTHMTRSRI  | AVIHEVQRFGDIPLGVTHMTRSRI   |
| 4 | CYP2D6    | nonsynonymous SNV | c.A911G  | p.Y304C  | RRPEMGDQAHMPYTTAVIHEVQRFG  | RRPEMGDQAHMPCTTAVIHEVQRFG  |
| 4 | CYP3A5    | nonsynonymous SNV | c.C914T  | p.A305V  | LELAAQSIIFIFAGYETTSSVLSFT  | LELAAQSIIFVGYETTSSVLSFT    |
| 4 | DCC       | nonsynonymous SNV | c.C1382T | p.T461I  | WRPPAEAKGNIQFTVFFSREGDNR   | WRPPAEAKGNIQFTVFFSREGDNR   |
| 4 | DHTKD1    | nonsynonymous SNV | c.C1258T | p.R420C  | ATRLAFEYQRQFRKDVIIIDLLCYRQ | ATRLAFEYQRQFCKDVIIIDLLCYRQ |
| 4 | DPCR1     | nonsynonymous SNV | c.G1413C | p.K471N  | GPTENRETTANEKTTLSPVEPTENR  | GPTENRETTANENTLSPVEPTENR   |
| 4 | DPCR1     | nonsynonymous SNV | c.C2747T | p.P916L  | GERTPFTNEKTPSSAEPTEHGERT   | GERTPFTNEKTTLSSAEPTEHGERT  |
| 5 | DPCR1     | nonsynonymous SNV | c.C2687A | p.S896Y  | EMTPLANEKTTLSPAEPTEGERTP   | EMTPLANEKTTLYPAEPTEGERTP   |
| 5 | DUSP2     | nonsynonymous SNV | c.G653T  | p.R218L  | SASCPNHFEGLFRYKSIPIVEDNQMV | SASCPNHFEGLFLYKSIPIVEDNQMV |
| 5 | EGF       | nonsynonymous SNV | c.G2945A | p.R982H  | RCQYRDLKWWELRHAGHGQQQKVIV  | RCQYRDLKWWELHHAGHGQQQKVIV  |
| 5 | ELFN2     | nonsynonymous SNV | c.C2045G | p.A682G  | LNSPLDRLPLVPAGSGGGSGGGGGI  | LNSPLDRLPLVPGSGGGSGGGGGI   |
| 5 | GABARAPL2 | nonsynonymous SNV | c.G6T    | p.W2C    | MWIIRKRIQLPSEK             | MCIIRKRIQLPSEK             |
| 5 | SLC25A3   | nonsynonymous SNV | c.C293T  | p.A98V   | LDLVKCRMQVCFACWTRAY        | LDLVKCRMQVCFVCWTRAY        |

|   |           |                         |                   |                |                             |                            |
|---|-----------|-------------------------|-------------------|----------------|-----------------------------|----------------------------|
| 5 | AACS      | nonsynonymous SNV       | c.C19A            | p.L7I          | MGHNFSLPVYKGEIQARNL         | MGHNFSIPVYKGEIQARNL        |
| 5 | CCDC80    | frameshift deletion     | c.50delT          | p.F17fs        | SMGQFSVFFFFFFWAQKKIASLSHS   | SMGQFSVFFFFFFSGHRKKLLA     |
| 5 | ASF1B     | nonsynonymous SNV       | c.C367T           | p.R123C        | YYVNNEYLNPELRENPPMKPDFSQV   | YYVNNEYLNPELCENPPMKPDFSQV  |
| 5 | TIMM50    | nonsynonymous SNV       | c.A235C           | p.T79P         | ALWLAGLLGAGGTVSVVYIFDPILV   | ALWLAGLLGAGGPVSVVYIFDPILV  |
| 5 | ABCG2     | nonsynonymous SNV       | c.G10T            | p.D4Y          | SDGDQTLGQTRKIKT             | SDGYQTLGQTRKIKT            |
| 5 | ADAMTS12  | nonsynonymous SNV       | c.A2785G          | p.K929E        | VLKPNKGTISNGKNPPTLKPVPPPT   | VLKPNKGTISNGENPPTLKPVPPPT  |
| 6 | MAGEC1    | nonsynonymous SNV       | c.T331C           | p.S111P        | GFPQSPLQIPVSSSSSTLL         | GFPQSPLQIPVSPSSSSTLL       |
| 6 | WDR19     | nonsynonymous SNV       | c.G1087A          | p.D363N        | YRHPVSVKKIFPDPNGTRLVFIDEK   | YRHPVSVKKIFPNPNGTRLVFIDEK  |
| 6 | ZNF66     | nonsynonymous SNV       | c.G1332T          | p.K444N        | KAFSRSSILTTHKIIHTGEKPYECE   | KAFSRSSILTTHNIIHTGEKPYECE  |
| 6 | MSLNL     | nonsynonymous SNV       | c.C320A           | p.P107Q        | HLPMHTVYTPCTPSPTRAHSCHLPV   | HLPMHTVYTPCTQSPTRAHSCHLPV  |
| 6 | RNF181    | nonsynonymous SNV       | c.G252C           | p.R84S         | AVFQVRWGQVFSRSGSLGGRACSSS   | AVFQVRWGQVFSSSGSLGGRACSSS  |
| 6 | PHF8      | nonsynonymous SNV       | c.C261G           | p.F87L         | HKGKPVKGTGSPTFVRELRSRTFD    | HKGKPVKGTGPTLVRELRSRTFD    |
| 6 | GOLGA6L2  | nonsynonymous SNV       | c.C1709G          | p.A570G        | DVGAGGEDAGSGAEDVGGGEDVGA    | DVGAGGEDAGSGGEDVGGGEDVGA   |
| 6 | TOMM5     | nonsynonymous SNV       | c.G209A           | p.R70Q         | GHPLTLRGHRGLRTELNGSGEQGGS   | GHPLTLRGHRGLQTELNGSGEQGGS  |
| 6 | RABL6     | nonsynonymous SNV       | c.T1141G          | p.W381G        | RGALGRRGQWPPWGGGRACHCLGRH   | RGALGRRGQWPPGGGGRACHCLGRH  |
| 6 | ZNF841    | nonsynonymous SNV       | c.C1016A          | p.T339K        | QLVRHQIIHTGETPYKCNCEGKVFR   | QLVRHQIIHTGEKPYKCNCEGKVFR  |
| 6 | LST1      | nonsynonymous SNV       | c.T31G            | p.W11G         | MIYVSTGAWGWAGSCFWQWFCP      | MIYVSTGAWGGAGSCFWQWFCP     |
| 6 | ZNF99     | nonsynonymous SNV       | c.A2715C          | p.K905N        | CGKGFNNFSTLMKHKIIHTGEKPYK   | CGKGFNNFSTLMNHKIIHTGEKPYK  |
| 7 | FAM194B   | nonframeshift deletion  | c.404_421del      | p.135_141del   | EEEEYLGKEEHL EEEEEYLGKEGYLE | EEEEYLGKEEHLGKEGYLEKEDYIE  |
| 7 | FAM47C    | nonsynonymous SNV       | c.T937A           | p.S313T        | TGVDPDLCLEPPKSRVSHLRPEPSET  | TGVDPDLCLEPPKTRVSHLRPEPSET |
| 7 | FGA       | nonsynonymous SNV       | c.T937A           | p.S313T        | GPGSTGNRNPSSGTGGTATWKPGS    | GPGSTGNRNPSTGTGGTATWKPGS   |
| 7 | FOXC2     | nonsynonymous SNV       | c.A1153C          | p.T385P        | NLAAGQEGALAAATGHHHQHHGHHHP  | NLAAGQEGALAAPGHHHQHHGHHHP  |
| 7 | FZD1      | nonframeshift insertion | c.1768_1769insCCC | p.A590delinsAP | AIPCPHLQAGGGAPPHPPMSPDFTV   | AIPCPHLQAGGGAPPHPPMSPDFT   |
| 7 | GABARAPL2 | nonsynonymous SNV       | c.G186T           | p.W62C         | LVPSDITVAQFMWIIRKRIQLPSEK   | LVPSDITVAQFMCIIRKRIQLPSEK  |
| 7 | H3F3A     | nonsynonymous SNV       | c.C344G           | p.A115G        | GLFEDTNLCAIHAKRVTIMPKDIQL   | GLFEDTNLCAIHGKRVTIMPKDIQL  |
| 7 | HMCN1     | nonsynonymous SNV       | c.A15862G         | p.I5288V       | CKDGTHQCRYNQICENTRGSYRCVC   | CKDGTHQCRYNQVCENTRGSYRCVC  |
| 7 | HOXA4     | nonsynonymous SNV       | c.A344C           | p.Q115P        | GYRGGASPRPPPEQPPAQAKGPA     | GYRGGASPRPPPEQPPAQAKGPA    |
| 7 | HOXA6     | nonsynonymous SNV       | c.G107C           | p.R36T         | QLPLYQAGYDALRPPASYGASSLP    | QLPLYQAGYDALTPPASYGASSLP   |

|    |           |                        |                |              |                           |                            |
|----|-----------|------------------------|----------------|--------------|---------------------------|----------------------------|
| 7  | IKBKE     | nonsynonymous SNV      | c.C1465T       | p.H489Y      | MRPGLGYNEEQIHKLDKVNFSHLAK | MRPGLGYNEEQIYKLDKVNFSHLAK  |
| 7  | IMPA2     | nonsynonymous SNV      | c.G719T        | p.R240I      | HCWDLAAATVIIIEAGGIVIDTSGG | HCWDLAAATVIIIIEAGGIVIDTSGG |
| 8  | IQCA1     | nonsynonymous SNV      | c.G190A        | p.V64I       | IFRNLENYVDQFVHPQKRILIRKVL | IFRNLENYVDQFIHPQKRILIRKVL  |
| 8  | IWS1      | nonsynonymous SNV      | c.T1238G       | p.V413G      | EDEEKASAKKSRVSDADSDSDAV   | EDEEKASAKKSRGVSDADSDSDAV   |
| 8  | KRTAP10-4 | nonsynonymous SNV      | c.A1026T       | p.Q342H      | PVCSGASSCCQSSCQPACCTTSC   | PVCSGASSCCQHSSCQPACCTTSC   |
| 8  | KRTAP10-4 | nonsynonymous SNV      | c.T787A        | p.S263T      | CQQSSCQPACCTSSPCQACCVPVC  | CQQSSCQPACCTTSPCQACCVPVC   |
| 8  | KRTAP4-9  | nonsynonymous SNV      | c.C211G        | p.Q71E       | CCQPTCSRPSCCQTTCRRTCYRPS  | CCQPTCSRPSCECTTCRRTCYRPS   |
| 8  | LINC00273 | nonsynonymous SNV      | c.C383T        | p.A128V      | HRGQPPEPSSLRALHADPIPSGLSP | HRGQPPEPSSLRVLHADPIPSGLSP  |
| 8  | LINC00273 | nonsynonymous SNV      | c.T341A        | p.L114H      | PSMKAAPRLPHRLRHRGQPPEPSSL | PSMKAAPRLPHRHRHRGQPPEPSSL  |
| 8  | LOC554223 | nonframeshift deletion | c.438_458del   | p.146_153del | RLSDATSPRMEPRAPWMEQEGPEY  | RLSDATSPRMEPEGPEYWEETGT    |
| 8  | LOC554223 | nonframeshift deletion | c.331_351del   | p.111_117del | ARQRRHESQDGAAGAVDGAGGAGIL | ARQRRHESQDGAGGAGILGRGDRDR  |
| 8  | LONRF3    | nonsynonymous SNV      | c.C443G        | p.A148G      | VAAEETGAAAAAAATEVWDGFKCRK | VAAEETGAAAAAGATEVWDGFKCRK  |
| 8  | LRP10     | frameshift deletion    | c.1250_1269del | p.V417fs     | RCRDEKCVYETWVCDGQPCADGSD  | RCRDEKCVYETWVCGRQ          |
| 8  | LRRC37A6P | nonsynonymous SNV      | c.T997A        | p.L333M      | SNLTQATVQPLDLGLTTTPESTTEI | SNLTQATVQPLDMGLTTTPESTTEI  |
| 9  | LST1      | nonsynonymous SNV      | c.T47G         | p.L16R       | RNDDICIYGGLGLGLLLLAVVLLS  | RNDDICIYGGLGRGLLLLAVVLLS   |
| 9  | MAGEC1    | nonsynonymous SNV      | c.T925C        | p.S309P      | GFPQSPLQIPVSSSSSTLLSLFQS  | GFPQSPLQIPVSPSSSSTLLSLFQS  |
| 9  | MCF2L2    | nonsynonymous SNV      | c.T3314G       | p.L1105R     | PAGATAGFQARALRPRTSAQES    | PAGATAGFQARARRPRTSAQES     |
| 9  | MGAT4B    | nonsynonymous SNV      | c.C701A        | p.P234H      | IHSGLLEVISPSHFYPDFSRLRES  | IHSGLLEVISPSHHFYPDFSRLRES  |
| 9  | MLIP      | nonsynonymous SNV      | c.C794T        | p.T265M      | LDVGGAVVEESATYFQTTAHSTPFS | LDVGGAVVEESAMYFQTTAHSTPFS  |
| 9  | MMP21     | nonsynonymous SNV      | c.A64C         | p.T22P       | TLLLCWLAAPWPTQPESLFHSRDRS | TLLLCWLAAPWPPQPESLFHSRDRS  |
| 9  | MTMR11    | nonsynonymous SNV      | c.T7G          | p.W3G        | MWWGGRGQSFNIAPQ           | MWGGGRGQSFNIAPQ            |
| 9  | MUC12     | nonsynonymous SNV      | c.G2248C       | p.A750P      | EPTSYHSSPGSTATTHFPDSSTTSG | EPTSYHSSPGSTPTTHFPDSSTTSG  |
| 9  | MUC17     | nonsynonymous SNV      | c.C1293A       | p.S431R      | DSKTFVTTASEASSPTTAEDTSIA  | DSKTFVTTASEARSSPTTAEDTSIA  |
| 9  | MUC21     | nonsynonymous SNV      | c.T243A        | p.H81Q       | SNGVSIVTNSEFHTTSSGISTATNS | SNGVSIVTNSEFQTTSSGISTATNS  |
| 9  | MUC21     | nonsynonymous SNV      | c.C877A        | p.P293T      | GISTVTNSESSTPSSGANTATNSES | GISTVTNSESSTTSSGANTATNSES  |
| 9  | MUC22     | nonsynonymous SNV      | c.G253T        | p.A85S       | SETTSASTMASTAAFTTGSETNTAS | SETTSASTMASTSAFTTGSETNTAS  |
| 10 | MYC       | nonsynonymous SNV      | c.A217C        | p.T73P       | SEDIWKKFELLPTPLSPRRSGLC   | SEDIWKKFELLPPPLSPRRSGLC    |
| 10 | NR0B1     | nonsynonymous SNV      | c.T271A        | p.Y91N       | ILYSMLTSAKQTYAAPKAPEATLGP | ILYSMLTSAKQTNAAPKAPEATLGP  |

|    |          |                   |          |          |                            |                            |
|----|----------|-------------------|----------|----------|----------------------------|----------------------------|
| 10 | NRTN     | nonsynonymous SNV | c.T490G  | p.C164G  | RRLRRERVRAQPCCRPTAYEDEVSF  | RRLRRERVRAQPGRPTAYEDEVSF   |
| 10 | PCDH12   | nonsynonymous SNV | c.C2385G | p.H795Q  | GQAGEPCEVGQSHKDVDKEAMMEAG  | GQAGEPCEVGQSQKDVDKEAMMEAG  |
| 10 | PCDHGA12 | nonsynonymous SNV | c.G409A  | p.E137K  | DINDNAPYFRESELEIKISENAATE  | DINDNAPYFRESKLEIKISENAATE  |
| 10 | PDE1C    | nonsynonymous SNV | c.G256C  | p.D86H   | VHDPRPPEEILADELPQLDSPEVLV  | VHDPRPPEEILAHHELPQLDSPEVLV |
| 10 | PDE1C    | nonsynonymous SNV | c.G256C  | p.D86H   | VHDPRPPEEILADELPQLDSSEVLV  | VHDPRPPEEILAHHELPQLDSSEVLV |
| 10 | PHF8     | nonsynonymous SNV | c.C369G  | p.F123L  | HKGKPVKTGSPTFVRELRSRTFDSS  | HKGKPVKTGSPTLVRELRSRTFDSS  |
| 10 | POLE     | nonsynonymous SNV | c.G3796C | p.E1266Q | ILGQPPALGTSQEEWLWVLRFHKKK  | ILGQPPALGTSQEEWLWVLRFHKKK  |
| 10 | POLG2    | nonsynonymous SNV | c.G199C  | p.E67Q   | EHPEAPGSGEGSEALLEICQRRHFL  | EHPEAPGSGEGSQALLEICQRRHFL  |
| 10 | POLR2A   | nonsynonymous SNV | c.C5744A | p.T1915N | TPTSPKYSPTSPTYSPKYSPTS     | TPTSPKYSPTSPNYSPTS         |
| 10 | PRNP     | nonsynonymous SNV | c.T124G  | p.W42G   | ASWWWLGAASWWLGAAPWWLWGT    | ASWWWLGAASWWLGAAPWWLWGT    |
| 11 | PRSS1    | nonsynonymous SNV | c.C44G   | p.A15G   | PLLILTFVAAAALAPFDDDDKIVGG  | PLLILTFVAAAALGAPFDDDDKIVGG |
| 11 | PRSS1    | nonsynonymous SNV | c.C47T   | p.A16V   | LLILTFVAAAALAPFDDDDKIVGGY  | LLILTFVAAAALAVPFDDDDKIVGGY |
| 11 | PRSS1    | nonsynonymous SNV | c.C49T   | p.P17S   | LILTFVAAAALAPFDDDDKIVGGYN  | LILTFVAAAALASFDDDDKIVGGYN  |
| 11 | RBM11    | nonsynonymous SNV | c.G603C  | p.Q201H  | WTHQQPSDSLDYQMTAPLNSASVS   | WTHQQPSDSLDYHMTAPLNSASVS   |
| 11 | RBMXL3   | nonsynonymous SNV | c.C1654A | p.R552S  | SYGQSHRYGGEGRYEYRGRSHDAHS  | SYGQSHRYGGEGSYEYRGRSHDAHS  |
| 11 | RBMXL3   | nonsynonymous SNV | c.G1256T | p.G419V  | SSNSYGQSHHYGGEGRYEYRGRSH   | SSNSYGQSHHYGVEGRYEEYRGRSH  |
| 11 | RERE     | nonsynonymous SNV | c.A1415G | p.N472S  | RRIKTRTASTPVNTSPRPPSSEFLD  | RRIKTRTASTPVSTSPRPPSSEFLD  |
| 11 | RING1    | nonsynonymous SNV | c.A760C  | p.S254R  | GTLGPPSPGAPSPPEPGGEIELVF   | GTLGPPSPGAPRPEPGGEIELVF    |
| 11 | RUNX1    | nonsynonymous SNV | c.A644C  | p.H215P  | QLRRTAMRVSPHHPAPTNPASLN    | QLRRTAMRVSPHHPAPTNPASLN    |
| 11 | RUNX1    | nonsynonymous SNV | c.A20C   | p.H7P    | MRVSPHHPAPTNPASLN          | MRVSPHHPAPTNPASLN          |
| 11 | SF3B1    | nonsynonymous SNV | c.G2704A | p.E902K  | EQLIDGILYAFQEQTTEDSVMLNGF  | EQLIDGILYAFQKQTTEDSVMLNGF  |
| 11 | SHC3     | nonsynonymous SNV | c.C271G  | p.R91G   | SGLRGLSSAARERAGARLSGSCSAP  | SGLRGLSSAAREGAGARLSGSCSAP  |
| 12 | SIKE1    | nonsynonymous SNV | c.G275A  | p.R92K   | ENTQIRDLQENRELWISLEEHQDA   | ENTQIRDLQENKELWISLEEHQDA   |
| 12 | SLC22A24 | nonsynonymous SNV | c.G10C   | p.D4H    | MGFDVLLDQVGGMGRF           | MGFHVLLDQVGGMGRF           |
| 12 | SPATA7   | nonsynonymous SNV | c.G193A  | p.E65K   | RREKLKKELAQCEKEFKLTKTAMRA  | RREKLKKELAQCKEKEFKLTKTAMRA |
| 12 | SPNS1    | nonsynonymous SNV | c.A1235C | p.E412A  | GGA AFLGTAIFIEADRRRAQLHVQG | GGA AFLGTAIFIAADRRRAQLHVQG |
| 12 | SRRM5    | nonsynonymous SNV | c.T1326A | p.S442R  | SPNKARDCSRSRSPYKARDRSRSRS  | SPNKARDCSRSRSPYKARDRSRSRS  |
| 12 | SSTR5    | nonsynonymous SNV | c.C807G  | p.I269M  | FAGCWLPFFTVNIVNLAVALPQEPA  | FAGCWLPFFTVNMVNLAVALPQEPA  |

|    |          |                   |          |          |                            |                             |
|----|----------|-------------------|----------|----------|----------------------------|-----------------------------|
| 12 | ST7L     | nonsynonymous SNV | c.C1405G | p.H469D  | NLLQCTWEGTFHHVSVYPKKELPLF  | NLLQCTWEGTFHDVSVYPKKELPLF   |
| 12 | ST7L     | nonsynonymous SNV | c.C1498G | p.H500D  | ETADRELLPTFHHVSVYPKKELPLF  | ETADRELLPTFHDVSVYPKKELPLF   |
| 12 | STK10    | nonsynonymous SNV | c.C714G  | p.H238Q  | TLIEMAQIEPPHHELNPMRVLLKIA  | TLIEMAQIEPPHQELNPMRVLLKIA   |
| 12 | SYNPO    | nonsynonymous SNV | c.A2050C | p.T684P  | GIEAQDRRESLTPSPWPWGASRPP   | GIEAQDRRESLPPSPWPWGASRPP    |
| 12 | TCHH     | nonsynonymous SNV | c.A3417T | p.Q1139H | EREKRRRQELERQYREEEVQQEEE   | EREKRRRQELERHYREEEVQQEEE    |
| 12 | TEX15    | nonsynonymous SNV | c.G5324C | p.R1775T | HDQLVELLEETKREKNSYYVFLKYK  | HDQLVELLEETKTEKNSYYVFLKYK   |
| 13 | TIMM50   | nonsynonymous SNV | c.A544C  | p.T182P  | ALWLAGLLGAGGTVSVVYIFGNP    | ALWLAGLLGAGGPVSVVYIFGNP     |
| 13 | TLE2     | nonsynonymous SNV | c.G439A  | p.V147M  | KVPICIPARRDLVDSASLASSLGS   | KVPICIPARRDLMDSASLASSLGS    |
| 13 | TOPAZ1   | nonsynonymous SNV | c.A169C  | p.T57P   | ENKQKRRMVARATPGRGEVESDKSV  | ENKQKRRMVARAPPGRGEVESDKSV   |
| 13 | TPSAB1   | nonsynonymous SNV | c.G68T   | p.G23V   | VLASRAYAAPAPGQALQRVGIVGGQ  | VLASRAYAAPAPVQALQRVGIVGGQ   |
| 13 | TPSAB1   | nonsynonymous SNV | c.G83A   | p.R28Q   | AYAAPAPGQALQRVGIVGGQEAPRS  | AYAAPAPGQALQVIVGGQEAPRS     |
| 13 | TPSAB1   | nonsynonymous SNV | c.T86C   | p.V29A   | YAAPAPGQALQRVGIVGGQEA PRSK | YAAPAPGQALQ RAGIVGGQEA PRSK |
| 13 | TRAPPC12 | nonsynonymous SNV | c.G1912A | p.E638K  | SAFLHLGQNNFAEHRFFTEILRMD   | SAFLHLGQNNFAKAHRFFTEILRMD   |
| 13 | TUBGCP6  | nonsynonymous SNV | c.C3717G | p.C1239W | ENVSDVAPIRRCNTHGHVSDASIS   | ENVSDVAPIRSRWNTHGHVSDASIS   |
| 13 | TUBGCP6  | nonsynonymous SNV | c.G3566T | p.G1189V | DMAPARPRWNTHGHVSDASISLGES  | DMAPARPRWNTHVHVSDASISLGES   |
| 13 | UBA1     | nonsynonymous SNV | c.G1828T | p.V610L  | SGTLGTKGNVQVVIPFLTESYSSSQ  | SGTLGTKGNVQVLIPFLTESYSSSQ   |
| 14 | UCN2     | nonsynonymous SNV | c.G151A  | p.A51T   | TPRPAASESPSAAPTWPWAAQSHCS  | TPRPAASESPSATPTWPWAAQSHCS   |
| 14 | USP49    | nonsynonymous SNV | c.G679C  | p.A227P  | TPRDAGPAASRPALPTSRRVPAAT   | TPRDAGPAASRPPALPTSRRVPAAT   |
| 14 | VEZF1    | nonsynonymous SNV | c.A1402C | p.T468P  | SPLTLTPVNLPTPV TAPVNIAHPV  | SPLTLTPVNLPPPVTAPVNIAHPV    |
| 14 | ZAN      | nonsynonymous SNV | c.T2456A | p.M819K  | ETTISTEKPSIPMEKPTLPTEETTT  | ETTISTEKPSIPKEKPTLPTEETTT   |
| 14 | ZNF117   | nonsynonymous SNV | c.G899C  | p.S300T  | QSSTLTTHKRIHSGEKPYKCEECGK  | QSSTLTTHKRIHTGEKPYKCEECGK   |
| 14 | ZNF12    | nonsynonymous SNV | c.C1754A | p.T585N  | GEKPYECSECGKTFQNSALNRHQR   | GEKPYECSECGKNFCQNSALNRHQR   |
| 14 | ZNF135   | nonsynonymous SNV | c.A1408G | p.T470A  | GEKPYGCNECGKTFSSHSSLSQHER  | GEKPYGCNECGKAFSSHSSLSQHER   |
| 14 | ZNF135   | nonsynonymous SNV | c.C1189G | p.Q397E  | KAFSSHSSSLTKHQRIHTGEKPYECH | KAFSSHSSSLTKHERIHTGEKPYECH  |
| 14 | ZNF14    | nonsynonymous SNV | c.C956G  | p.S319C  | YECKEKGKAFYFASFAHVIIHTG    | YECKEKGKAFYFASFAHVIIHTG     |
| 14 | ZNF154   | nonsynonymous SNV | c.C996A  | p.S332R  | HRVHTGERPYKCSECGKSFSQRSAL  | HRVHTGERPYKCRECGKSFSQRSAL   |
| 14 | ZNF180   | nonsynonymous SNV | c.G1530T | p.Q510H  | CNQCCKSFSWSSQLVAHQRTHTGEK  | CNQCCKSFSWSSHLVAHQRTHTGEK   |
| 14 | ZNF208   | nonsynonymous SNV | c.A2157T | p.K719N  | NLMEHKRIHTGEKPYKCEECGKSFS  | NLMEHKRIHTGENPYKCEECGKSFS   |

|    |        |                   |          |          |                           |                            |
|----|--------|-------------------|----------|----------|---------------------------|----------------------------|
| 15 | ZNF208 | nonsynonymous SNV | c.A1849G | p.T617A  | GEKPYKCEECGKTFSKVSTLTTHKA | GEKPYKCEECGKAFSKVSTLTTHKA  |
| 15 | ZNF211 | nonsynonymous SNV | c.C933A  | p.S311R  | RRVHTGERPYECSECGKSFSQNFSL | RRVHTGERPYECRECGKSFSQNFSL  |
| 15 | ZNF28  | nonsynonymous SNV | c.A2049T | p.R683S  | VFNQQAHLAQHQRVHTGEKPYKCNE | VFNQQAHLAQHQSVHTGEKPYKCNE  |
| 15 | ZNF283 | nonsynonymous SNV | c.T1251A | p.S417R  | CKECGKAFNCGSSLIQHERIHTGEK | CKECGKAFNCGSRLIQHERIHTGEK  |
| 15 | ZNF304 | nonsynonymous SNV | c.C1071A | p.H357Q  | SRSSHLVQHQRHTGERPYKCNKCG  | SRSSHLVQHQRHTGERPYKCNKCG   |
| 15 | ZNF345 | nonsynonymous SNV | c.A1185T | p.E395D  | SKLIQHQLIHTGERPYECKEKGKSF | SKLIQHQLIHTGDRPYECKEKGKSF  |
| 15 | ZNF429 | nonsynonymous SNV | c.T838A  | p.S280T  | RYSTLTTHKRIHSGEKPYKCDECGK | RYSTLTTHKRIHTGEKPYKCDECGK  |
| 15 | ZNF430 | nonsynonymous SNV | c.T1231A | p.W411R  | FYKCEECGKGFNWSSTLTKHKRIHT | FYKCEECGKGFNRSSSTLTKHKRIHT |
| 15 | ZNF431 | nonsynonymous SNV | c.C1008A | p.F336L  | AFNQSSTLSTHKFIHAGEKPYKCEE | AFNQSSTLSTHKLIHAGEKPYKCEE  |
| 15 | ZNF460 | nonsynonymous SNV | c.T1318A | p.W440R  | AFTRMSGLTRHQWIHTGEKPYVCIQ | AFTRMSGLTRHQRIHTGEKPYVCIQ  |
| 15 | ZNF460 | nonsynonymous SNV | c.T1326A | p.H442Q  | TRMSGLTRHQWIHTGEKPYVCIQCG | TRMSGLTRHQWIHTGEKPYVCIQCG  |
| 15 | ZNF501 | nonsynonymous SNV | c.G123C  | p.Q41H   | KFFTQRSSLTQHQRHHRGEKPYVCS | KFFTQRSSLTQHHRHHRGEKPYVCS  |
| 16 | ZNF530 | nonsynonymous SNV | c.G1249A | p.G417S  | RPYVCSECGKSFQKSVLIQHQRVH  | RPYVCSECGKSFQKSVLIQHQRVH   |
| 16 | ZNF616 | nonsynonymous SNV | c.C1475A | p.P492H  | LAAHQRIHTGEKPYKNECGKVFQ   | LAAHQRIHTGEKHYKNECGKVFQ    |
| 16 | ZNF675 | nonsynonymous SNV | c.G1443T | p.K481N  | EHKKIHSGEIPYKCEECGKAFKHSS | EHKKIHSGEIPYNCEECGKAFKHSS  |
| 16 | ZNF679 | nonsynonymous SNV | c.C942A  | p.H314Q  | GKAFSLSSSLTYHKRIHTGEKPYTC | GKAFSLSSSLTYQKRIHTGEKPYTC  |
| 16 | ZNF679 | nonsynonymous SNV | c.G1181C | p.S394T  | CEECDKAFKWSSTLANHKSMTGEK  | CEECDKAFKWSSTLANHKSMTGEK   |
| 16 | ZNF700 | nonsynonymous SNV | c.G1305C | p.Q435H  | CKQCGKAFRSASQLRVHGGTHTGEK | CKQCGKAFRSASHLRVHGGTHTGEK  |
| 16 | ZNF708 | nonsynonymous SNV | c.G722T  | p.R241I  | CGKAFNQSSTLTRHKIHTGEKLYK  | CGKAFNQSSTLTIHKIHTGEKLYK   |
| 16 | ZNF709 | nonsynonymous SNV | c.T1460G | p.F487C  | PYECKQCGKAFSFSFRMHERTHT   | PYECKQCGKAFSCSSFRMHERTHT   |
| 16 | ZNF728 | nonsynonymous SNV | c.G1145C | p.S382T  | CEECGKAFSWPSSLTEHKRIHAGDK | CEECGKAFSWPSSLTEHKRIHAGDK  |
| 16 | ZNF728 | nonsynonymous SNV | c.C963A  | p.F321L  | EKPYKCEECGKAFNRSSNLMEHKRI | EKPYKCEECGKALNRSSNLMEHKRI  |
| 16 | ZNF729 | nonsynonymous SNV | c.G2471T | p.C824F  | TVHKVIHTGEKPKCEECGKAFKHF  | TVHKVIHTGEKPKCEECGKAFKHF   |
| 16 | ZNF729 | nonsynonymous SNV | c.G3082A | p.A1028T | REKLYKCEECVKAFNFSALMKHKI  | REKLYKCEECVKTFNFSALMKHKI   |
| 17 | ZNF787 | nonsynonymous SNV | c.C926G  | p.A309G  | AHQRAQHGDGLGAAGGEEPAHICVE | AHQRAQHGDGLGGAGGEEPAHICVE  |
| 17 | ZNF799 | nonsynonymous SNV | c.C1845A | p.H615Q  | LHRHKKTHWKKTHTGENPYGCKEKG | LHRHKKTHWKKTHTGENPYGCKEKG  |
| 17 | ZNF813 | nonsynonymous SNV | c.C1684A | p.Q562K  | PYKNECGKVFNQKAHLARHRLHT   | PYKNECGKVFNKAHLARHRLHT     |
| 17 | ZNF841 | nonsynonymous SNV | c.C1364A | p.T455K  | QLVRHQIHTGETPYKNECGKVFF   | QLVRHQIHTGETPYKNECGKVFF    |



|    |        |                      |              |         |                            |                                                                                     |
|----|--------|----------------------|--------------|---------|----------------------------|-------------------------------------------------------------------------------------|
| 17 | ZNF92  | nonsynonymous SNV    | c.A635T      | p.E212V | SSTLTKHKRIHTEEKPYKCEECGKA  | SSTLTKHKRIHTVEKPYKCEECGKA                                                           |
| 17 | ZNF93  | nonsynonymous SNV    | c.C886A      | p.Q296K | PYKCEECGKAFNQSSTLTKHKKIHT  | PYKCEECGKAFNKSSTLTKHKKIHT                                                           |
| 17 | ZNF93  | nonsynonymous SNV    | c.A1502T     | p.K501I | AFNQSSSLTKHKKIHTGEKPYKCEE  | AFNQSSSLTKHKIIHTGEKPYKCEE                                                           |
| 17 | ATP5F1 | frameshift insertion | c.56_57insGG | p.A19fs | SVPAGSGSELRNAGQGQWGQLGDATQ | SVPAGSGSELRNAGGRAGDSSVTRPRTQTGRRPETPLRQQTP<br>RGAPLSLRPSPEGTATLLLARIASMAPSCFPAVALMR |

## Patient #4

| TMG | Gene name | Mutation type        | cDNA change     | Amino acid change | Wild type minigene sequence | Mutated minigene sequence                                   |
|-----|-----------|----------------------|-----------------|-------------------|-----------------------------|-------------------------------------------------------------|
| 1   | ABCA1     | frameshift insertion | c.6596_6597insC | p.K2199fs         | LARIFSILSQSKRHLHIEDYSVSQT   | LARIFSILSQSKNATPHRRLLCFSDNT                                 |
| 1   | ABTB2     | nonsynonymous SNV    | c.G1213C        | p.D405H           | CPQMESMENPNLDPPRMTLNNERPF   | CPQMESMENPNLHPPRMTLNNERPF                                   |
| 1   | AFF4      | nonsynonymous SNV    | c.G3322A        | p.E1108K          | YVQVTSNFLYATEIWDQAEQLSKEQ   | YVQVTSNFLYATKIWDQAEQLSKEQ                                   |
| 1   | AKT1S1    | nonsynonymous SNV    | c.A496C         | p.T166P           | GSLSEETPAGPPTCSVPPASALPTQ   | GSLSEETPAGPPCSVPPASALPTQ                                    |
| 1   | ANKRD36   | nonsynonymous SNV    | c.C817G         | p.P273A           | PINSNPVSSQKQPALKATSGKEDSI   | PINSNPVSSQQAALKATSGKEDSI                                    |
| 1   | ANKRD36   | nonsynonymous SNV    | c.C47G          | p.T16S            | ILKNAASVFSETTSLEVSSQKQPAL   | ILKNAASVFSETSSLEVSSQKQPAL                                   |
| 1   | ANKRD36   | nonsynonymous SNV    | c.T1320G        | p.N440K           | TNRRTISQQSAENLDAACGIDKTEN   | TNRRTISQQSAEKLDAACGIDKTEN                                   |
| 1   | ASIC4     | nonsynonymous SNV    | c.G556A         | p.G186S           | STSTLHGLGRACGPGPHGLRRTLWA   | STSTLHGLGRACSPGPHGLRRTLWA                                   |
| 1   | ATF4      | nonsynonymous SNV    | c.A450C         | p.K150N           | VNPIGHLPESLTKPDQVAPFTFLQP   | VNPIGHLPESLTNPQVAPFTFLQP                                    |
| 1   | BLOC1S3   | nonsynonymous SNV    | c.G577A         | p.E193K           | RLLPDIRGVPGTEPEKDPGPA       | RLLPDIRGVPGTKPEKDPGPA                                       |
| 1   | C17orf53  | nonsynonymous SNV    | c.A1159C        | p.T387P           | LVTAASRTPQQPTHSTRAKTRRFP    | LVTAASRTPQQPPHSTRAKTRRFP                                    |
| 1   | CACNA1A   | frameshift deletion  | c.3984delT      | p.F1328fs         | LDFIVVSGALVAFAGTGNKSGKDIN   | LDFIVVSGALVALPSLAIKEKTSTRLNPSSESSGCYDLLK<br>PSSGCQSSRLCLTVW |
| 2   | CCNB3     | nonsynonymous SNV    | c.T2622A        | p.F874L           | LQEKPSIEQEALFKRHSALWEKPST   | LQEKPSIEQEALLKRHSALWEKPST                                   |
| 2   | CDK5R1    | nonsynonymous SNV    | c.G3A           | p.M1I             | MGTVLSLSPSYRK               | IGTVLSLSPSYRK                                               |
| 2   | CEP131    | nonsynonymous SNV    | c.C1670G        | p.P557R           | DSQQEGWVPEAGPGPLELGSEVSTS   | DSQQEGWVPEAGRGPLELGSEVSTS                                   |
| 2   | CHD2      | nonsynonymous SNV    | c.G4164T        | p.M1388I          | GEVKDDGLEKSPMKKKQKKKENKEN   | GEVKDDGLEKSPIKKKQKKKENKEN                                   |
| 2   | CHKA      | nonsynonymous SNV    | c.G94C          | p.G32R            | LSCGSGSAAPAGVGGQRDAASDLE    | LSCGSGSAAPAPRVGGQRDAASDLE                                   |
| 2   | CNTNAP3B  | nonsynonymous SNV    | c.G841C         | p.D281H           | DQHWHSVLIELLDTQVNFVVDKHTH   | DQHWHSVLIELLHTQVNFVVDKHTH                                   |
| 2   | COL6A3    | nonsynonymous SNV    | c.C2588T        | p.P863L           | FVSRIVRRLNIGPSKVRVGVVQFSN   | FVSRIVRRLNIGLSKVRVGVVQFSN                                   |
| 2   | CORO6     | nonsynonymous SNV    | c.G883A         | p.E295K           | LCGKGDSSIRYFEITDEPPFVHYLN   | LCGKGDSSIRYFKITDEPPFVHYLN                                   |
| 2   | DAXX      | nonsynonymous SNV    | c.T73A          | p.S25T            | DDEDEAAAQPGPSHPLPNAASPGAE   | DDEDEAAAQGPPTHPLPNAASPGAE                                   |
| 2   | DDX11L1   | nonsynonymous SNV    | c.G181A         | p.E61K            | SVPSVAESLHHPEITFLTAFLCLPSF  | SVPSVAESLHHPKITFLTAFLCLPSF                                  |
| 2   | DHX33     | nonsynonymous SNV    | c.C176T         | p.S59L            | GGRRQQPPLAQPSASPYPEAVELQR   | GGRRQQPPLAQPLASPYPEAVELQR                                   |
| 2   | DNAJC6    | nonsynonymous SNV    | c.C140T         | p.A47V            | VGGKQRVNAGAAARSPARQPPDRAS   | VGGKQRVNAGAAVRSPARQPPDRAS                                   |
| 3   | DPCR1     | nonsynonymous SNV    | c.C1127A        | p.S376Y           | HGERTANENTTPSPAEPTEHGERTA   | HGERTANENTTPYPAEPTEHGERTA                                   |
| 3   | DVL2      | nonsynonymous SNV    | c.C275T         | p.S92L            | CFNGRVVSWLVSSDNPQPEMAPPVH   | CFNGRVVSWLVSLDNPQPEMAPPVH                                   |

|   |          |                        |              |              |                           |                            |
|---|----------|------------------------|--------------|--------------|---------------------------|----------------------------|
| 3 | EFCAB4A  | nonsynonymous SNV      | c.G440C      | p.R147P      | PPSQVGLGPRPSRQAQSHLAGLPGS | PPSQVGLGPRPSPQAQSHLAGLPGS  |
| 3 | ELF2     | nonsynonymous SNV      | c.G1315A     | p.A439T      | QASGQTPPRVISAVIKGPEVKSEAV | QASGQTPPRVISTVIKGPVKSEAV   |
| 3 | SPSB2    | nonsynonymous SNV      | c.C409G      | p.R137G      | GSNSESWGWDIGRGLYHQSKGPGA  | GSNSESWGWDIGGGKLYHQSKGPGA  |
| 3 | ZNF614   | nonsynonymous SNV      | c.C1024T     | p.P342S      | LIVHQRTHTEKPYICSECGKGFTM  | LIVHQRTHTEKSYICSECGKGFTM   |
| 3 | TATDN1   | frameshift deletion    | c.168delA    | p.K56fs      | TNGILIFLLPKKK             | TNGILIFLLPKKN              |
| 3 | ATXN2L   | nonsynonymous SNV      | c.A37C       | p.S13R       | MAFAAALSPSPASGPLFALNRRLHQ | MAFAAALSPSPARGPLFALNRRLHQ  |
| 3 | FAM9C    | nonsynonymous SNV      | c.G298A      | p.D100N      | YNPYSRLYELVDDKTVLNAFFSYIA | YNPYSRLYELVDNKTVLNAFFSYIA  |
| 3 | ZNF724   | nonsynonymous SNV      | c.C766A      | p.R256S      | HKIIHTGEKSYKREECGKAFNISSH | HKIIHTGEKSYKSEECGKAFNISSH  |
| 3 | ZNF676   | nonsynonymous SNV      | c.G1730C     | p.S577T      | ECGKAFKSSSTVSYHKKIHTGENP  | ECGKAFKSSSTVTYHKKIHTGENP   |
| 3 | RPS4X    | nonsynonymous SNV      | c.G349A      | p.E117K      | TKGRFAVHRITPEEAKPC        | TKGRFAVHRITPKEAKPC         |
| 4 | PRR31    | nonsynonymous SNV      | c.A500T      | p.E167V      | RGHAGPPEGWAGEGGVSPGLTPLLG | RGHAGPPEGWAGVGGVSPGLTPLLG  |
| 4 | ZNF99    | nonsynonymous SNV      | c.G2537T     | p.R846M      | ECGKAFFNSALRKHKIIHTGEKPY  | ECGKAFFNSALMKHKIIHTGEKPY   |
| 4 | ERC2     | nonsynonymous SNV      | c.G295A      | p.G99R       | NRAVYGGRTAMGSSPNIASAGLSH  | NRAVYGGRTAMRSSPNIASAGLSH   |
| 4 | ERCC2    | nonsynonymous SNV      | c.G175C      | p.V59L       | IYCSRTVPEIEKVIEELRKLNFYE  | IYCSRTVPEIEKLIEELRKLNFYE   |
| 4 | ERICH1   | nonsynonymous SNV      | c.G851T      | p.R284L      | EDGVDTIEEDLTRAGEEDGKDTREE | EDGVDTIEEDLTRAGEEDGKDTREE  |
| 4 | FAM120B  | nonsynonymous SNV      | c.C1405A     | p.P469T      | PRQEVPMYTGSEPRQEVPMYGPES  | PRQEVPMYTGSETRQEVPMYGPES   |
| 4 | FAM194B  | nonframeshift deletion | c.404_421del | p.135_141del | EEEEYLGKEEHLKEEYLGKEGYLE  | EEEEYLGKEEHLGKEGYLEKEDYIE  |
| 4 | FAM194B  | nonsynonymous SNV      | c.G260T      | p.G87V       | GKEEYLKEEYLGKEEHLKEEYLE   | GKEEYLKEEYLVKEEHLKEEYLE    |
| 4 | FEV      | nonsynonymous SNV      | c.A607C      | p.T203P      | GFSYWPGPGAATAAAATAALYSPSP | GFSYWPGPGAAPAAAAATAALYSPSP |
| 4 | FKBP11   | nonsynonymous SNV      | c.T33A       | p.H11Q       | MTLRPSLLPLHLLLLLLLLSAAVC  | MTLRPSLLPLQLLLLLLLLLSAAVC  |
| 4 | GP6      | nonsynonymous SNV      | c.T1820C     | p.V607A      | HCTLARVTKPDFVSKNTGMNMSITL | HCTLARVTKPDFASKNTGMNMSITL  |
| 4 | GSDMD    | nonsynonymous SNV      | c.A446C      | p.H149P      | RWARRGQGRAGPHLPQATLLFIYL  | RWARRGQGRAGPPLPQATLLFIYL   |
| 5 | HAND2    | nonsynonymous SNV      | c.G262C      | p.G88R       | DHSHYGGVPPGAGPPGLGPRPVKR  | DHSHYGGVPPGARPPGLGPRPVKR   |
| 5 | HSD17B6  | nonsynonymous SNV      | c.T317A      | p.L106H      | TQWVKEHVGDRLWGLVNNAGILTP  | TQWVKEHVGDGRHWGLVNNAGILTP  |
| 5 | HSF4     | nonsynonymous SNV      | c.G125C      | p.S42T       | DPGTDHLIRWSPSGTSFLVSDQSRF | DPGTDHLIRWSPGTGTSFLVSDQSRF |
| 5 | JAG1     | nonsynonymous SNV      | c.A556C      | p.T186P      | TGVAHFYQIRVTCDDYYYGFGCNK  | TGVAHFYQIRVPCDDYYYGFGCNK   |
| 5 | KANSL1   | frameshift insertion   | c.2109dupA   | p.S704fs     | KPFDKIKPPKLSLKHRAPMPGSLP  | KPFDKIKPPKLLIA             |
| 5 | KIAA1244 | nonsynonymous SNV      | c.C6525G     | p.I2175M     | REWLGRVGRVYDIIV           | REWLGRVGRVYDMIV            |

|   |           |                        |              |            |                             |                             |
|---|-----------|------------------------|--------------|------------|-----------------------------|-----------------------------|
| 5 | KRT2      | nonsynonymous SNV      | c.A1789T     | p.S597C    | SGGGYSGGGKHS SGGGSRGGSSSG   | SGGGYSGGGKHCSGGGSRGGSSSG    |
| 5 | KRTAP1-3  | nonsynonymous SNV      | c.C121G      | p.Q41E     | CCETSCCQPSCCQTSFCGFPSFSTS   | CCETSCCQPSCCETSFCGFPSFSTS   |
| 5 | LOC407835 | nonframeshift deletion | c.200_214del | p.67_72del | AFLTQKAKV GELKDDDFERTSELDA  | AFLTQKAKV GELKRTSELDA GNGGV |
| 5 | LOC642846 | nonsynonymous SNV      | c.G344A      | p.S115N    | QLINDRCVDMQRSRHEK KGAEEK    | QLINDRCVDMQRNRHEK KGAEEK    |
| 5 | LOC642846 | nonsynonymous SNV      | c.G344A      | p.S115N    | QLINDRCVDMQRSRHGSHRDHGVA A  | QLINDRCVDMQRNRHGSHRDHGVA A  |
| 5 | LOC642846 | nonsynonymous SNV      | c.G794A      | p.S265N    | QLINDRCVDMQRSRHVA VFSVFLC   | QLINDRCVDMQRNRHVA VFSVFLC   |
| 6 | LPA       | nonsynonymous SNV      | c.G65A       | p.S22N     | LLLFLKSAAPEQSHVVQDCYHGDGQ   | LLLFLKSAAPEQNHVVQDCYHGDGQ   |
| 6 | MAGEC1    | nonsynonymous SNV      | c.T617C      | p.F206S    | PQSPLQIPVSRFSSTLLSIFQSSP    | PQSPLQIPVSRSSSTLLSIFQSSP    |
| 6 | MAGEC1    | nonsynonymous SNV      | c.A2376T     | p.Q792H    | SSFFSYTLASLLQSSHESQPSPPEG   | SSFFSYTLASLLHSSHESQPSPPEG   |
| 6 | MAML2     | nonsynonymous SNV      | c.G199A      | p.D67N     | EGRYERGRAESSDRERESTLQLLSL   | EGRYERGRAESSNRERESTLQLLSL   |
| 6 | MAP6      | nonsynonymous SNV      | c.C394T      | p.R132W    | VMRQDYRAWK VQRPEPSCRPRSEYQ  | VMRQDYRAWK VQWPEPSCRPRSEYQ  |
| 6 | MEMO1     | nonsynonymous SNV      | c.T446C      | p.L149P    | ALSESKEQEFGLFSKY LADPSNLF   | ALSESKEQEFGKPF SKYLADPSNLF  |
| 6 | MUC12     | nonsynonymous SNV      | c.C10193A    | p.S3398Y   | PGSTATTHFPDSSTTSGRSEESTAS   | PGSTATTHFPDSYTTSGRSEESTAS   |
| 6 | MUC12     | nonsynonymous SNV      | c.T10404A    | p.S3468R   | TPGLEKSTTFHSSPRSPATLSPA     | TPGLEKSTTFHRSRSPATLSPA      |
| 6 | MUC16     | nonsynonymous SNV      | c.A33440T    | p.E11147V  | VEASSAVLTVSPEVPGMVTSLVTSS   | VEASSAVLTVSPVPGMVTSLVTSS    |
| 6 | MUC22     | nonsynonymous SNV      | c.G4273A     | p.A1425T   | SEATTSSAAGSEATTTSTEGSETTT   | SEATTSSAAGSETTTTSTEGSETTT   |
| 6 | MYO3B     | nonsynonymous SNV      | c.G283A      | p.D95N     | NVVKFYGMFYKADHC VGGQLWLVL E | NVVKFYGMFYKANHC VGGQLWLVL E |
| 6 | NFATC2IP  | nonsynonymous SNV      | c.T773A      | p.L258H    | QEDEVVLVEGPTLPETPRLFPLKIR   | QEDEVVLVEGPTHETPRLFPLKIR    |
| 7 | NOS3      | nonsynonymous SNV      | c.G346C      | p.G116R    | VFPRKLQGRPSGPPAPEQLLSQAR    | VFPRKLQGRPSRPPAPEQLLSQAR    |
| 7 | NSUN5P2   | nonsynonymous SNV      | c.G140C      | p.W47S     | AMLLDPRQAPMSWMPVPPQAIKTSH   | AMLLDPRQAPMSSMPVPPQAIKTSH   |
| 7 | NUP93     | nonsynonymous SNV      | c.G40A       | p.E14K     | DTEGFGELLQAEQLAAETEGISEL    | DTEGFGELLQAKQLAAETEGISEL    |
| 7 | OSBPL1A   | nonsynonymous SNV      | c.A1142C     | p.K381T    | ENGEIDQASEEKKRLEEKQRAARKN   | ENGEIDQASEEKTRLEEKQRAARKN   |
| 7 | PAX7      | nonsynonymous SNV      | c.A883C      | p.T295P    | AFNHLLPGGFPPGMPPLPPYQLPD    | AFNHLLPGGFPPGMPPLPPYQLPD    |
| 7 | PITPNM1   | nonsynonymous SNV      | c.A2441C     | p.Q814P    | WKGSELATDPPAQAAPSTTSEVVK    | WKGSELATDPPAPPAAPSTTSEVVK   |
| 7 | PPP1R10   | nonsynonymous SNV      | c.A2524T     | p.S842C    | RPHEGPGGSMGGSGGHRPHEGPGHG   | RPHEGPGGSMGGCGGHRPHEGPGHG   |
| 7 | PRDM9     | nonsynonymous SNV      | c.T2379A     | p.S793R    | CGRGFRDKSNLLSHQRTHTEKPYV    | CGRGFRDKSNLLRHQRTHTEKPYV    |
| 7 | PRRC2A    | nonsynonymous SNV      | c.C3833T     | p.T1278I   | NAARGSEGKPSLTPASAPGPEEAL    | NAARGSEGKPSLILPASAPGPEEAL   |
| 7 | PRSS3     | nonsynonymous SNV      | c.G125T      | p.G42V     | YQVSLNSGSHFCGGLISEQWVVSA    | YQVSLNSGSHFCVGLISEQWVVSA    |

|    |          |                   |           |           |                           |                            |
|----|----------|-------------------|-----------|-----------|---------------------------|----------------------------|
| 7  | PRSS3    | nonsynonymous SNV | c.T137A   | p.I46N    | LNSGSHFCGGSLISEQWVVSAAHCY | LNSGSHFCGGSLNSEQWVVSAAHCY  |
| 7  | PRSS3    | nonsynonymous SNV | c.C141G   | p.S47R    | NSGSHFCGGSLISEQWVVSAAHCYK | NSGSHFCGGSLIREQWVVSAAHCYK  |
| 8  | PRSS37   | nonsynonymous SNV | c.G449A   | p.R150Q   | WSQENSGRHPDLRQNLEAPVMSDRE | WSQENSGRHPDLQQNLEAPVMSDRE  |
| 8  | PRSS37   | nonsynonymous SNV | c.G446A   | p.R149Q   | DWSQENSRHPDLRQNLEAPVMSDRE | DWSQENSRHPDLQQNLEAPVMSDRE  |
| 8  | PRSS37   | nonsynonymous SNV | c.G410A   | p.R137Q   | HNSHEQGRHPDLRQNLEAPVMSDRE | HNSHEQGRHPDLQQNLEAPVMSDRE  |
| 8  | RBMXL3   | nonsynonymous SNV | c.G2102A  | p.R701H   | YSGGHDSSSQSNRYGGGGRYEYERG | YSGGHDSSSQSNHYGGGGRYEYERG  |
| 8  | RILPL1   | nonsynonymous SNV | c.A88T    | p.I30F    | NVAELTVMDVYDIASLVGHEFERVI | NVAELTVMDVYDFASLVGHEFERVI  |
| 8  | RP1L1    | nonsynonymous SNV | c.C5726A  | p.P1909Q  | WEVQPESEGAEAPEAEKEAQPETES | WEVQPESEGAEAEAEKEAQPETES   |
| 8  | SAMD1    | nonsynonymous SNV | c.G61C    | p.A21P    | PPETAAAATTAASSSAASPHYQE   | PPETAAAATTAAPASSAASPHYQE   |
| 8  | SH3GL1P1 | nonsynonymous SNV | c.G527C   | p.R176P   | MPLPSDSLVPPrPSIHTGWHPRQV  | MPLPSDSLVPPrPSIHTGWHPRQV   |
| 8  | SLC25A5  | nonsynonymous SNV | c.T811C   | p.F271L   | RKIARDEGGKAFKGAWSNVLRGMG  | RKIARDEGGKAFKGAWSNVLRGMG   |
| 8  | SLC9A8   | nonsynonymous SNV | c.G1783A  | p.E595K   | RQGPGSEDDEQELL            | RQGPGSEDDEQKLL             |
| 9  | SOGA1    | nonsynonymous SNV | c.G4418T  | p.W1473L  | WNLHQGKQNGSAWARSTTRDSPVL  | WNLHQGKQNGSALARSTTRDSPVL   |
| 9  | SON      | nonsynonymous SNV | c.G2232T  | p.Q744H   | DSQMLASNTMDSQMLASNTMDSQML | DSQMLASNTMDSHMLASNTMDSQML  |
| 9  | SOX5     | nonsynonymous SNV | c.C703T   | p.P235S   | QARLSKQHLEKYPDYKYKPRPKRTC | QARLSKQHLEKYSYDYKYKPRPKRTC |
| 9  | SPEN     | nonsynonymous SNV | c.T10105A | p.C3369S  | VQSTQPAQPAPPCPPSQLGQPGQPP | VQSTQPAQPAPPPPSQLGQPGQPP   |
| 9  | SPEN     | nonsynonymous SNV | c.T10114A | p.S3372T  | TQPAQPAPPCPPSQLGQPGQPPSSK | TQPAQPAPPCPPTQLGQPGQPPSSK  |
| 9  | SRSF9    | nonsynonymous SNV | c.T286G   | p.W96G    | VEFPRTYGGRGGWPRGGRNGPPTRR | VEFPRTYGGGGPRGGRNGPPTRR    |
| 9  | TCEB3CL  | nonsynonymous SNV | c.G1495A  | p.G499S   | AGSSQAPSLGDGDGGSVSGGGSSN  | AGSSQAPSLGDSGDGGSVSGGGSSN  |
| 9  | TCHH     | nonsynonymous SNV | c.G3193A  | p.G1065R  | EEELQQEEEQLLGEERTRRRQELE  | EEELQQEEEQLLREERTRRRQELE   |
| 9  | TCHH     | nonsynonymous SNV | c.C2933G  | p.P978R   | LQQKEEQLLGEPEKRRRQEREKKY  | LQQKEEQLLGEEREKRRRQEREKKY  |
| 9  | THSD7B   | nonsynonymous SNV | c.G770T   | p.C257F   | EACIVEGELLQQCPRYSWRTSEWKE | EACIVEGELLQQFPRYSWRTSEWKE  |
| 9  | TMEM131  | nonsynonymous SNV | c.T919A   | p.F307I   | IRIKTNASDSTEIILPVEVEVTTA  | IRIKTNASDSTEIILPVEVEVTTA   |
| 9  | TMEM251  | nonsynonymous SNV | c.G34A    | p.D12N    | MLAFSEMPKPPDYSELSDSLTLAV  | MLAFSEMPKPPNYSELSDSLTLAV   |
| 10 | TNS3     | nonsynonymous SNV | c.G1570A  | p.G524S   | CHKSSQNSLLSDGFGSNVGEDPQGT | CHKSSQNSLLSDSFGSNVGEDPQGT  |
| 10 | TREX2    | nonsynonymous SNV | c.T452A   | p.L151Q   | PRDTVCLDTLPALRGLDRAHSHGTR | PRDTVCLDTLPAQRGLDRAHSHGTR  |
| 10 | TTN      | nonsynonymous SNV | c.G38836T | p.V12946L | APKEVVPEKKVPVTPPKKPEVPPVK | APKEVVPEKKVPLTPPKKPEVPPVK  |
| 10 | TUBBP5   | nonsynonymous SNV | c.A421T   | p.T141S   | PDNFIFGELRARTGVRLLSQGSSKS | PDNFIFGELRARGVRLLSQGSSKS   |

|    |         |                        |                |              |                            |                            |
|----|---------|------------------------|----------------|--------------|----------------------------|----------------------------|
| 10 | TUBGCP3 | nonframeshift deletion | c.1241_1255del | p.414_419del | TRDFPTRDFPTRDFPMPHVFPTRVFP | TRDFPTRDFPTRVFPTRVFPTRVWH  |
| 10 | UBXN4   | nonsynonymous SNV      | c.G1504A       | p.G502R      | QDDGEDENNTWNGNSTQQM        | QDDGEDENNTWNRNSTQQM        |
| 10 | USP48   | frameshift deletion    | c.1975delT     | p.S659fs     | EDILCPHAVFFFSKYIFLNSGELCI  | EDILCPHAVFFFPNIFF          |
| 10 | WEE1    | nonsynonymous SNV      | c.A253C        | p.S85R       | PERRRSPGPAPGSPGELEEDLLPLG  | PERRRSPGPAPGRPGELEEDLLPLG  |
| 10 | ZCCHC6  | nonsynonymous SNV      | c.A421G        | p.R141G      | RKDSFQENEDGYRWQDTRGCRTVRR  | RKDSFQENEDGYGWQDTRGCRTVRR  |
| 10 | ZFP62   | nonsynonymous SNV      | c.A2328T       | p.K776N      | KAFRNSSGLTVHKRIHTGEKPYECD  | KAFRNSSGLTVHNRIHTGEKPYECD  |
| 10 | ZMYND15 | nonsynonymous SNV      | c.A1883C       | p.Q628P      | MAVATGGGTSPQPNNPFRSPFRLRA  | MAVATGGGTSPPPNPFRSPFRLRA   |
| 10 | ZNF100  | nonsynonymous SNV      | c.G1262T       | p.R421I      | GFNWSSALTKHKRIHTGEKPYKCEE  | GFNWSSALTKHKIHTGEKPYKCEE   |
| 11 | ZNF112  | nonsynonymous SNV      | c.C1849T       | p.H617Y      | CEECGKGFSSSHLQGHQRVHTGEK   | CEECGKGFSSSYLQGHQRVHTGEK   |
| 11 | ZNF112  | nonsynonymous SNV      | c.G1859C       | p.G620A      | CGKGFSSSHLQGHQRVHTGEKPFK   | CGKGFSSSHLQAHQRVHTGEKPFK   |
| 11 | ZNF208  | nonsynonymous SNV      | c.G1323T       | p.M441I      | ECGKAFNWSSNLMEHKKIHTGETPY  | ECGKAFNWSSNLIEHKKIHTGETPY  |
| 11 | ZNF25   | nonsynonymous SNV      | c.C983A        | p.A328D      | CKECRKCFYQKSALTVHQRTHHTGEK | CKECRKCFYQKSDLTVHQRTHHTGEK |
| 11 | ZNF257  | nonsynonymous SNV      | c.C1417A       | p.H473N      | CEECGKAFNQSSHLTQHKKIHTGEK  | CEECGKAFNQSSNLTQHKKIHTGEK  |
| 11 | ZNF257  | nonsynonymous SNV      | c.C1081A       | p.Q361K      | CGKAFNRSSHLTQHKKIHTKEKPYK  | CGKAFNRSSHLTKHKIHTKEKPYK   |
| 11 | ZNF257  | nonsynonymous SNV      | c.A821T        | p.Q274L      | CGKAFNRSSHITLHKRIHNREKPFK  | CGKAFNRSSHITLHKRIHNREKPFK  |
| 11 | ZNF30   | nonsynonymous SNV      | c.G1296C       | p.K432N      | QRIHTGEKPYECKEKGKAFISRHQL  | QRIHTGEKPYECNECGKAFISRHQL  |
| 11 | ZNF30   | nonsynonymous SNV      | c.G1297A       | p.E433K      | RIHTGEKPYECKEKGKAFISRHQLT  | RIHTGEKPYECKKCGKAFISRHQLT  |
| 11 | ZNF37A  | nonsynonymous SNV      | c.T1373A       | p.L458Q      | KFFCYYSGFTEHLRRHTGEKPFGCN  | KFFCYYSGFTEHQRRHTGEKPFGCN  |
| 11 | ZNF431  | nonsynonymous SNV      | c.G810C        | p.K270N      | KPFKCEECGKAFKQSSLTTHKIIH   | KPFKCEECGKAFNQSSLTTHKIIH   |
| 11 | ZNF469  | nonsynonymous SNV      | c.A604C        | p.T202P      | SFTSTNYTSPSATPRPPAPGPPQSR  | SFTSTNYTSPSAPRPPAPGPPQSR   |
| 12 | ZNF519  | nonsynonymous SNV      | c.A1353T       | p.Q451H      | KAFNRGSHLTRHQRIHTGEKSFKCE  | KAFNRGSHLTRHHRIHTGEKSFKCE  |
| 12 | ZNF595  | nonsynonymous SNV      | c.C101G        | p.T34R       | KPYKCEECGKAFRRSTTLNEHKKIH  | KPYKCEECGKAFRRSTTLNEHKKIH  |
| 12 | ZNF626  | nonsynonymous SNV      | c.T914A        | p.I305K      | AFNRSSTLTTHKKIHTGEKPYKCEE  | AFNRSSTLTTHKKIHTGEKPYKCEE  |
| 12 | ZNF678  | nonsynonymous SNV      | c.C1129A       | p.Q377K      | RHKRIHTGEKPYQCEECGKTFNRCS  | RHKRIHTGEKPYKCEECGKTFNRCS  |
| 12 | ZNF678  | nonsynonymous SNV      | c.G1352T       | p.R451M      | KAFNKFSSLTQHRRHTGVKPYKCE   | KAFNKFSSLTQHMRHTGVKPYKCE   |
| 13 | ZNF695  | nonsynonymous SNV      | c.G1112T       | p.R371M      | KAFNQSSHLTEHRRHTGEKPYKCE   | KAFNQSSHLTEHMRIHTGEKPYKCE  |
| 13 | ZNF721  | nonsynonymous SNV      | c.G1849A       | p.E617K      | KIHTGEKLYKCEECGKDFVWYTDLN  | KIHTGEKLYKCEKCGKDFVWYTDLN  |
| 13 | ZNF735  | nonsynonymous SNV      | c.A893T        | p.K298I      | NHKRIHTGERPYKCEECGKAHSVSS  | NHKRIHTGERPYICEECGKAHSVSS  |

|    |        |                   |          |         |                            |                            |
|----|--------|-------------------|----------|---------|----------------------------|----------------------------|
| 13 | ZNF790 | nonsynonymous SNV | c.C985A  | p.Q329K | KAFSQRSHLIKHQRIHTGEKPYECK  | KAFSQRSHLIHKRIHTGEKPYECK   |
| 13 | ZNF813 | nonsynonymous SNV | c.A1048T | p.T350S | QTSSLTCHRRRLHTGEKPFKCNECGK | QTSSLTCHRRRLHSGEKPFKCNECGK |
| 13 | ZNF83  | nonsynonymous SNV | c.G1210T | p.D404Y | HRIHTGEKPYKCDECGKVFSQNSYL  | HRIHTGEKPYKCYECGKVFSQNSYL  |
| 13 | ZNF85  | nonsynonymous SNV | c.T1313A | p.I438K | GFKWPSTLTIHKIIHTGEKPYKCEE  | GFKWPSTLTIHKKIHTGEKPYKCEE  |
| 13 | ZNF850 | nonsynonymous SNV | c.C841G  | p.Q281E | QIHTGEKPYHCKQCGKSFTVGSTLI  | QIHTGEKPYHCKEKGKSFTVGSTLI  |
| 13 | ZNF93  | nonsynonymous SNV | c.G1560T | p.Q520H | PYKCEECGKAFNQSSSLIKHKKIHT  | PYKCEECGKAFNHSSTLIKHKKIHT  |
| 13 | ZNF99  | nonsynonymous SNV | c.G2248T | p.V750L | CGKAFKWSSKLTVHKVIHTAEKPCK  | CGKAFKWSSKLTLLHKVIHTAEKPCK |
| 13 | ZNF99  | nonsynonymous SNV | c.G1526T | p.C509F | TVHKVIHMEEKPCKCEECGKAFKHF  | TVHKVIHMEEKPFKCEECGKAFKHF  |

## Patient #5

| TMG | Gene name    | Mutation type     | cDNA change | Amino acid change | Wild type minigene sequence | Mutated minigene sequence   |
|-----|--------------|-------------------|-------------|-------------------|-----------------------------|-----------------------------|
| 1   | ABHD17A      | nonsynonymous SNV | c.T196A     | p.W66R            | GTLRASSGAPGRWKLHLTERADFQY   | GTLRASSGAPGRRKLHLTERADFQY   |
| 1   | ABHD17A      | nonsynonymous SNV | c.T113G     | p.V38G            | LAFLPPEATYSLVPEPEPGGGAGA    | LAFLPPEATYSLGPEPEPGGGAGA    |
| 1   | ACOT4        | nonsynonymous SNV | c.G22A      | p.E8K             | MSATLILEPPGRCCWNEPVRIAVRG   | MSATLILKPPGRCCWNEPVRIAVRG   |
| 1   | AHNAK2       | nonsynonymous SNV | c.C12629G   | p.A4210G          | DVKLPEGPLPKGAGLKGHLPKVQMP   | DVKLPEGPLPKGGGLKGHLPKVQMP   |
| 1   | AHNAK2       | nonsynonymous SNV | c.C12022G   | p.Q4008E          | PKVEADVSLPSMQGDLKATDLSVQP   | PKVEADVSLPSMEGDLKATDLSVQP   |
| 1   | AHNAK2       | nonsynonymous SNV | c.A9817G    | p.S3273G          | DVTAPDVEVSQPSMEVDVEAPGAKL   | DVTAPDVEVSQPGMEVDVEAPGAKL   |
| 1   | APOE         | nonsynonymous SNV | c.C359A     | p.A120D           | RARLSKELQAAQARLGADMEDVCGR   | RARLSKELQAAQDRLGADMEDVCGR   |
| 1   | AQP1         | nonsynonymous SNV | c.A161T     | p.N54I            | RLFDLYYYDGLANQQEQIRLTIDTT   | RLFDLYYYDGLAIQEQEIRLTIDTT   |
| 1   | AQP7         | nonsynonymous SNV | c.G167A     | p.R56H            | SVADRDAVAVSLRHHGPGEQPSTAR   | SVADRDAVAVSLHHHGPGEQPSTAR   |
| 1   | AQP7         | nonsynonymous SNV | c.G286A     | p.A96T            | AWLTGMLQLCLFAITDQENNPALPG   | AWLTGMLQLCLFTITDQENNPALPG   |
| 1   | ARHGAP2<br>3 | nonsynonymous SNV | c.T4453C    | p.S1485P          | SLQSQPPIRRAASRLHQCL         | SLQSQPPIRRAAPRLHQCL         |
| 1   | ATF5         | nonsynonymous SNV | c.T263C     | p.L88P            | LLPLEPPLPPGTLQPSPTPPDLEA    | LLPLEPPLPPGTPPQPSPTPPDLEA   |
| 2   | BAGE3        | nonsynonymous SNV | c.G305A     | p.C102Y           | LLKDRRKMQTVQCATARETS        | LLKDRRKMQTVQYATARETS        |
| 2   | BANP         | nonsynonymous SNV | c.G688A     | p.E230K           | EEDYPNGTWLGDENNPENRVRCAII   | EEDYPNGTWLGDKNNPENRVRCAII   |
| 2   | BC068290     | nonsynonymous SNV | c.T611C     | p.L204P           | THVCLSRVPRRSLDPKKGFPDTRT    | THVCLSRVPRRSPDPKKGFPDTRT    |
| 2   | BRD8         | nonsynonymous SNV | c.C458T     | p.S153F           | PRLVNESEMAMAVAFGHLNSTGVLLEV | PRLVNESEMAMAVAFGHLNSTGVLLEV |
| 2   | BRD8         | nonsynonymous SNV | c.C548T     | p.S183F           | TSGVNESEMAMAVAFGHLNSTGVLLEV | TSGVNESEMAMAVAFGHLNSTGVLLEV |
| 2   | C17orf64     | nonsynonymous SNV | c.C36A      | p.D12E            | MEASDGQGGEGDKPLEQVTNVSCLE   | MEASDGQGGEGEKPLEQVTNVSCL    |
| 2   | C2orf72      | nonsynonymous SNV | c.C173T     | p.P58L            | RALLRDFARAVFPPEPGAAPGGAA    | RALLRDFARAVFLPEPGAAPGGAA    |
| 2   | CABP2        | nonsynonymous SNV | c.T73C      | p.S25P            | PGAGALRTPCSGAPHQGAPAPAPA    | PGAGALRTPCSGAPHQGAPAPAPA    |
| 2   | CABP2        | nonsynonymous SNV | c.T59C      | p.L20P            | PWRRGPKDPLQWLGSPPRGSCSPS    | PWRRGPKDPLQWPGSPPRGSCSPS    |
| 2   | CD209        | nonsynonymous SNV | c.A731G     | p.Q244R           | KSKQQEIQELTQLKAAVERLCHPC    | KSKQQEIQELTRLKAAVERLCHPC    |
| 2   | CDRT1        | nonsynonymous SNV | c.G334A     | p.V112M           | QGGNASLTECAHVRLHIAGHLPASR   | QGGNASLTECAHMLRHIAGHLPASR   |
| 3   | CHCHD10      | nonsynonymous SNV | c.C89T      | p.S30L            | APSAHPPAHPPPSAAAPAPAPSGQP   | APSAHPPAHPPPLAAAPAPAPSGQP   |
| 3   | CLCF1        | nonsynonymous SNV | c.C230A     | p.A77D            | NPPRLGAETLPRATVDLEVWRSND    | NPPRLGAETLPRDTVDLEVWRSND    |
| 3   | CLCN5        | nonsynonymous SNV | c.T187A     | p.L63I            | REVGHHIIGDDNLS              | REVGHHIIGDDNIS              |



|   |          |                   |          |          |                            |                            |
|---|----------|-------------------|----------|----------|----------------------------|----------------------------|
| 3 | CNKSR2   | nonsynonymous SNV | c.T197A  | p.I66N   | DLGVSRIHQELILEAVDLLCALNY   | DLGVSRIHQELNLEAVDLLCALNY   |
| 3 | CR1      | nonsynonymous SNV | c.C3275A | p.T1092N | TNRENFHYGSSVVTYRCNLGSRGRKV | TNRENFHYGSSVNYRCNLGSRGRKV  |
| 3 | DCAF15   | nonsynonymous SNV | c.C5A    | p.A2E    | MAPSSKSERNMSGAGSGGGGPGGAGG | MEPSSKSERNMSGAGSGGGGPGGAGG |
| 3 | EAF1     | nonsynonymous SNV | c.C83A   | p.A28D   | LRLGESFEKRPRASFHTIRYDFKPA  | LRLGESFEKRPRDSFHTIRYDFKPA  |
| 3 | EFCAB6   | nonsynonymous SNV | c.G680A  | p.R227K  | GLQVSSKGPLTKRNSINSRNESHKE  | GLQVSSKGPLTKKNSINSRNESHKE  |
| 3 | EIF2B5   | nonsynonymous SNV | c.C782A  | p.T261K  | ISICSPQVAQLFTDNFDYQTRDDFV  | ISICSPQVAQLFKDNFDYQTRDDFV  |
| 3 | ENSA     | nonsynonymous SNV | c.A335G  | p.K112R  | MKNKQLPSAGPDKNLVTGDHIPTPQ  | MKNKQLPSAGPDRNLVTGDHIPTPQ  |
| 3 | FAM136A  | nonsynonymous SNV | c.A470G  | p.N157S  | FQDRLARCTMHCNDKAKDS        | FQDRLARCTMHCSDKAKDS        |
| 3 | ADAM7    | nonsynonymous SNV | c.T2228C | p.L743S  | EIHFLNQRTPESLESPTSFSSPHY   | EIHFLNQRTPESSESPTSFSSPHY   |
| 4 | ASCC2    | nonsynonymous SNV | c.A606T  | p.Q202H  | KLQCLRWSKTPSQKKRKKTKPCSVT  | KLQCLRWSKTPSHKKRKKTKPCSVT  |
| 4 | NDRG4    | nonsynonymous SNV | c.A59G   | p.D20G   | RFPEEKPLLRGQDATELEHDIETPY  | RFPEEKPLLRGQGATELEHDIETPY  |
| 4 | UNC93B1  | nonsynonymous SNV | c.G1492A | p.V498M  | LGSSLHMKAKLAVLLVTLVAAAVSY  | LGSSLHMKAKLAMLLVTLVAAAVSY  |
| 4 | RAB5B    | nonsynonymous SNV | c.T50C   | p.L17P   | GVLKPGNPLPPLPPLQYPPPSTLS   | GVLKPGNPLPFPPLPPLQYPPPSTLS |
| 4 | FBXO2    | nonsynonymous SNV | c.G77A   | p.S26N   | GAWDTSGLTIKESVQPEEASPEEQ   | GAWDTSGLTIKENVQPEEASPEEQ   |
| 4 | DCAF15   | nonsynonymous SNV | c.C2A    | p.A1E    | APSSKSERNMSGAGSGGGGPGGAGGK | EPSSKSERNMSGAG             |
| 4 | ATP5A1   | nonsynonymous SNV | c.A163G  | p.N55D   | RALSAGGRGAVANAAILHPWLLRLD  | RALSAGGRGAVADAAILHPWLLRLD  |
| 4 | FAM100A  | nonsynonymous SNV | c.T197G  | p.V66G   | TRAAAGPAGAWRVSRGLSSCRQPSA  | TRAAAGPAGAWRGRGLSSCRQPSA   |
| 4 | SAMD8    | nonsynonymous SNV | c.G53T   | p.R18L   | RHRPRLHSGSPPRAPPPLEALHSG   | RHRPRLHSGSPPLAPPPLEALHSG   |
| 4 | ZNF66    | nonsynonymous SNV | c.G1261A | p.G421R  | SSPLSKHKRIHTGEKPYKCEECGKA  | SSPLSKHKRIHTREKPYKCEECGKA  |
| 4 | SELENON  | nonsynonymous SNV | c.G1148A | p.R383H  | WQQELSWEEAARRLEVAMYPFKKVS  | WQQELSWEEAARRHLEVAMYPFKKVS |
| 4 | C15orf40 | nonsynonymous SNV | c.C219A  | p.F73L   | ELQVHATHTRLIFVFEETGSRHVA   | ELQVHATHTRLILVFEETGSRHVA   |
| 5 | MARCH10  | nonsynonymous SNV | c.G391A  | p.A131T  | ASTSPDPVPESPAVLCYFPISCPTP  | ASTSPDPVPESPTVLCYFPISCPTP  |
| 5 | LRRC75B  | nonsynonymous SNV | c.C169A  | p.L57M   | RRPERARQLLRLLRQDPGDSGPWRE  | RRPERARQLLRMRQDPGDSGPWRE   |
| 5 | CYP4F31P | nonsynonymous SNV | c.A200G  | p.D67G   | GPLHILGTDGNVDTTGKLGVLVPTPP | GPLHILGTDGNVGTGKLGVLVPTPP  |
| 5 | PRR33    | nonsynonymous SNV | c.A1276C | p.T426P  | QGRLAGPSGGEHTPASLTRLPLFLYR | QGRLAGPSGGEHPPASLTRLPLFLYR |
| 5 | AC099489 | nonsynonymous SNV | c.G1043A | p.R348Q  | VTLRPLEEVWRERAEAMRRLQAWV   | VTLRPLEEVWREAEAMRRLQAWV    |
| 5 | ZNF724   | nonsynonymous SNV | c.G1105A | p.E369K  | KRIHTGEKPYKCEECGKAFNVSSTL  | KRIHTGEKPYKCEECGKAFNVSSTL  |
| 5 | LILRB3   | nonsynonymous SNV | c.C560A  | p.T187N  | RGFQALFPVGPVTPSHS          | RGFQALFPVGPVNPVSHS         |

|   |                 |                   |                 |         |                            |                             |
|---|-----------------|-------------------|-----------------|---------|----------------------------|-----------------------------|
| 5 | AC092384.1      | nonsynonymous SNV | c.C641G         | p.A214G | FRICSPVPWTGTATEGQSVGTCLPD  | FRICSPVPWTGTGTEGQSVGTCLPD   |
| 5 | IGHV2-26        | nonsynonymous SNV | c.G208T         | p.A70S  | IRQPPGKALEWLAHIFSNDEKSYST  | IRQPPGKALEWLSHIFSNDEKSYST   |
| 5 | ENSG00000240834 | nonsynonymous SNV | c.T328A         | p.C110S | SSLQPEDFATYYCQQANSFP       | SSLQPEDFATYYSQQANSFP        |
| 5 | DUX4L4          | nonsynonymous SNV | c.C767T         | p.A256V | PAPPDGALSHPQAPRWPPHPGKSRE  | PAPPDGALSHPQVPRWPPHPGKSRE   |
| 5 | DUX4L4          | nonsynonymous SNV | c.G865C         | p.A289P | LPGCAVAQPGPAQAGPQQGVLP     | LPGCAVAQPGPPQAGPQQGVLP      |
| 6 | DUX4L4          | nonsynonymous SNV | c.G988A         | p.A330T | VAGAAWEPQAGEAPPQPAPPDASA   | VAGAAWEPQAGETPPPQPAPPDASA   |
| 6 | ENSG00000267976 | nonsynonymous SNV | c.G113T         | p.C38F  | FPSSLTSLPPSPSCHPWWPGRPG    | FPSSLTSLPPSPSCHPWWPGRPG     |
| 6 | LRRC2-AS1       | nonsynonymous SNV | c.A282T         | p.K94N  | RKV TARPRMQSRKGTVLSPLCGQIP | RKV TARPRMQSRNGTVLSPLCGQIP  |
| 6 | EPHB3           | nonsynonymous SNV | c.G101A         | p.G34D  | PLLLLPLLLLPA GCRALETLM DTK | PLLLLPLLLLPA DCRALLETLM DTK |
| 6 | ESRRB           | nonsynonymous SNV | c.A923T         | p.D308V | DDKL VYAEDYIMDEEHSRLAGLLEL | DDKL VYAEDYIMVEEHSRLAGLLEL  |
| 6 | ETV2            | nonsynonymous SNV | c.C272A         | p.A91D  | SREFQLCDPKEVARLWGERKRKPGM  | SREFQLCDPKEVDRLWGERKRKPGM   |
| 6 | FAM115C         | nonsynonymous SNV | c.A214G         | p.T72A  | LVVVSHEGYLSHTGLAPFLNAVSW   | LVVVSHEGYLSHAGLAPFLNAVSW    |
| 6 | FAM136A         | nonsynonymous SNV | c.A260G         | p.N87S  | FQDRLARCTMHCNDKAKDSIDAGSK  | FQDRLARCTMHCSDKAKDSIDAGSK   |
| 6 | FAM211B         | nonsynonymous SNV | c.C169A         | p.L57M  | RRPERARQLLRLLRQDLGLERTLLP  | RRPERARQLLRMLRQDLGLERTLLP   |
| 6 | FAM47A          | nonsynonymous SNV | c.G262A         | p.A88T  | FLLPKISLRGPQADPKSGQKLLKK   | FLLPKISLRGPQTDPKSGQKLLKK    |
| 6 | FAM9C           | nonsynonymous SNV | c.A461G         | p.K154R | KEEQIKIFQEQQKRWQQDGKGTED   | KEEQIKIFQEQQRRWQQDGKGTED    |
| 6 | FARP1           | nonsynonymous SNV | c.C2275A        | p.P759T | LIGIDNLVVPGRPGSFLIRTPHLG   | LIGIDNLVVPGRPGSFLIRTPHLG    |
| 7 | FBXO2           | nonsynonymous SNV | c.G26A          | p.S9N   | MDGDGDPESVGPPEEASPEEQ      | MDGDGDPENVGPPEEASPEEQ       |
| 7 | FRG1B           | nonsynonymous SNV | c.G148C c.C149A | p.A50H  | EQWEPVFQNGKMALLASNSCFIRC   | EQWEPVFQNGKMHLLASNSCFIRC    |
| 7 | FRG1B           | nonsynonymous SNV | c.G4C c.C5A     | p.A2H   | MALLASNSCFIRCNEAGDIEAKSKT  | MHLLASNSCFIRCNEAGDIEAKSKT   |
| 7 | FUT3            | nonsynonymous SNV | c.C974T         | p.T325M | HARYLSYFRWRETLRPRFSWALDF   | HARYLSYFRWREMLRPRFSWALDF    |
| 7 | GABRD           | nonsynonymous SNV | c.G1063C        | p.D355H | AKVKVSRPRAEMDVRNAIVLFLSA   | AKVKVSRPRAEMHVRNAIVLFLSA    |
| 7 | GLCCI1          | nonsynonymous SNV | c.A415G         | p.S139G | RPRRSPESHRRSSPERRSPGPVC    | RPRRSPESHRRSGPERRSPGPVC     |
| 7 | GNA12           | nonsynonymous SNV | c.C67T          | p.R23C  | CLLPAEAGGARERRAGSGARDAERE  | CLLPAEAGGARECRAGSGARDAERE   |
| 7 | GOLGA6L1        | nonsynonymous SNV | c.A1874G        | p.Q625R | EKMWEQEEKMCEQEEKMQEQUEKMR  | EKMWEQEEKMCEREKMQEQUEKMR    |
| 7 | GOLGA8DP        | nonsynonymous SNV | c.A615C         | p.K205N | LGKERLEAASQQKQLTAQLSLMAL   | LGKERLEAASQQNQLTAQLSLMAL    |
| 7 | GPR143          | nonsynonymous SNV | c.A844G         | p.K282E | LEMQTDINGGSLKPVRTAAKTTWFI  | LEMQTDINGGSLKPVRTAAKTTWFI   |

|    |                  |                   |          |          |                            |                           |
|----|------------------|-------------------|----------|----------|----------------------------|---------------------------|
| 7  | GUSB             | nonsynonymous SNV | c.T410G  | p.V137G  | SAHSYAIVWVNGVDLTLEHEGGYLPF | SAHSYAIVWVNGDLEHEGGYLPF   |
| 7  | GXYLT1           | nonsynonymous SNV | c.T351G  | p.H117Q  | SAIIFSIKPLQFHIFAEDQLHHSFK  | SAIIFSIKPLQFQIFAEDQLHHSFK |
| 8  | GXYLT1           | nonsynonymous SNV | c.T351G  | p.H117Q  | RYSLKIQPVKEKMLAVVACGERLEE  | RYSLKIQPVKEKMLAVVACGERLEE |
| 8  | HGC6.3           | nonsynonymous SNV | c.A365C  | p.Q122P  | TAGGMTPTASSSQHTAGVMTPTASS  | TAGGMTPTASSSPHTAGVMTPTASS |
| 8  | IQSEC3           | nonsynonymous SNV | c.A41G   | p.Y14C   | ESLLENPVRAVLYLKELTAIVQNQQ  | ESLLENPVRAVLCKELTAIVQNQQ  |
| 8  | IQSEC3           | nonsynonymous SNV | c.C92T   | p.T31I   | TAIVQNQQSLIHTQRERIDELERRL  | TAIVQNQQSLIHIQRERIDELERRL |
| 8  | IRS2             | nonsynonymous SNV | c.A3244C | p.T1082P | GDYTEMAFGVAATPPQPIAAPPKPE  | GDYTEMAFGVAAPPQPIAAPPKPE  |
| 8  | KIAA1109         | nonsynonymous SNV | c.A4823T | p.K1608M | NIQDTIAEIRRKISFKVVF        | NIQDTIAEIRRMISFKVVF       |
| 8  | KIAA1210         | nonsynonymous SNV | c.A5119T | p.I1707F | RKKAKAWSHMAEITQ            | RKKAKAWSHMAEFTQ           |
| 8  | KRT18            | nonsynonymous SNV | c.A201G  | p.I67M   | RGGMGSGGLATGIAGGLAGMGGIQN  | RGGMGSGGLATGMAGGLAGMGGIQN |
| 8  | KRT6B            | nonsynonymous SNV | c.G262A  | p.G88R   | SCAISGGYGSRRAGSYFGGAGSGF   | SCAISGGYGSRRAGSYFGGAGSGF  |
| 8  | KRTAP1-3         | nonsynonymous SNV | c.T148C  | p.F50L   | SCCQTSFCGFPFSTSGTCSSSCCQ   | SCCQTSFCGFPPLSTSGTCSSSCCQ |
| 8  | KRTAP4-6         | nonsynonymous SNV | c.T580C  | p.C194R  | TTCYRPTCVISTCPRPLCCASSCC   | TTCYRPTCVISTRPRPLCCASSCC  |
| 8  | LEPREL2          | nonsynonymous SNV | c.C167T  | p.A56V   | GLRAYAAGAWAPAVALLREALRSQA  | GLRAYAAGAWAPVVALREALRSQA  |
| 9  | LILRB3           | nonsynonymous SNV | c.C560A  | p.T187N  | GGFQALFPVGPVTPSHRWRFTCYYY  | GGFQALFPVGPVNPSHRWRFTCYYY |
| 9  | LOC10028<br>8778 | nonsynonymous SNV | c.G379A  | p.A127T  | VLASAPPLPPSTAAPVGQGARQDDS  | VLASAPPLPPSTTAPVGQGARQDDS |
| 9  | LOC10028<br>8778 | nonsynonymous SNV | c.C475T  | p.R159C  | GGSSSLRPPDFWRAQCTRVDFLWVC  | GGSSSLRPPDFWCAQCTRVDFLWVC |
| 9  | LOC39975<br>3    | nonsynonymous SNV | c.G1725T | p.E575D  | TAILLLAHGSREEVNETCGEGDGCT  | TAILLLAHGSREDVNETCGEGDGCT |
| 9  | LOC40101<br>0    | nonsynonymous SNV | c.C1603A | p.P535T  | DTEGFLERGLGPLSTRRGVEEDKE   | DTEGFLERGLGTLSTRRGVEEDKE  |
| 9  | LOC64575<br>2    | nonsynonymous SNV | c.G270C  | p.K90N   | NNQALSVLSKEQKQRLQEERLQE    | NNQALSVLSKEQNQRLQEERLQE   |
| 9  | MAFA             | nonsynonymous SNV | c.G293A  | p.S98N   | GSSQAGGAPPPSGGPGAVGGTSGK   | GSSQAGGAPPPNGGPGAVGGTSGK  |
| 9  | MUC5B            | nonsynonymous SNV | c.A5977C | p.T1993P | TPIPSSSLGTTWTRLSQTTTPTATM  | TPIPSSSLGTTWPRLSQTTTPTATM |
| 9  | NACAD            | nonsynonymous SNV | c.T1999C | p.S667P  | SAPKPVAAATLVSQAAEGLTLPQD   | SAPKPVAAATLVPPQAAEGLTLPQD |
| 9  | NBPF10           | nonsynonymous SNV | c.G580A  | p.A194T  | VLESSAPREVQKAEESKVPEDSLEE  | VLESSAPREVQKTEESKVPEDSLEE |
| 9  | NBPF15           | nonsynonymous SNV | c.A715G  | p.T239A  | TKITFEEDKV DSTLIGSSSHVEWED | TKITFEEDKVDSALIGSSSHVEWED |
| 9  | NBPF8            | nonsynonymous SNV | c.G342T  | p.L114F  | EGYSTLSIPPEMLASYKSYSSTFHS  | EGYSTLSIPPEMFASYKSYSSTFHS |
| 10 | NDRG4            | nonsynonymous SNV | c.A59G   | p.D20G   | RFPEEKPLLRGQDATELESSDAFLL  | RFPEEKPLLRGQGATELESSDAFLL |

|    |          |                   |          |         |                           |                            |
|----|----------|-------------------|----------|---------|---------------------------|----------------------------|
| 10 | NLGN4X   | nonsynonymous SNV | c.C1434A | p.S478R | PTYFYAFYHHCQSEMKPSWADSAHG | PTYFYAFYHHCQREMKPSWADSAHG  |
| 10 | NLGN4X   | nonsynonymous SNV | c.C572T  | p.A191V | EGTGNMIDGSILASYGNVIVITINY | EGTGNMIDGSILVSYGNVIVITINY  |
| 10 | NOTCH2NL | nonsynonymous SNV | c.C563A  | p.P188H | GQYCDSLYVPCAPSPCVNGGTCRQT | GQYCDSLYVPCAHSPCVNGGTCRQT  |
| 10 | NPIPL1   | nonsynonymous SNV | c.C26G   | p.T9S   | MVKLSIVLTPQFLSHDQSQLTKELQ | MVKLSIVLSPQFLSHDQSQLT      |
| 10 | NSUN5P2  | nonsynonymous SNV | c.A176C  | p.Q59P  | CSLCQEENEDMVQDALQQNPGAFRL | CSLCQEENEDMVPDALQQNPGAFRL  |
| 10 | NSUN5P2  | nonsynonymous SNV | c.A568C  | p.K190Q | APSARRRMKTWYKMRCRSTRAPSG  | APSARRRMKTWYQMRCRSTRAPSG   |
| 10 | OR10G9   | nonsynonymous SNV | c.C560A  | p.A187D | HLYCDAPPILKLACADTSANEMVIF | HLYCDAPPILKLDACADTSANEMVIF |
| 10 | OR1D5    | nonsynonymous SNV | c.T308C  | p.F103S | AISYAGCLTQLYFLVSLVTLDNLIL | AISYAGCLTQLYSLVSLVTLDNLIL  |
| 10 | OR2L8    | nonsynonymous SNV | c.A206T  | p.D69V  | PMYFLLSQLSLIDLNYISTIVPKMA | PMYFLLSQLSLIVLNYISTIVPKMA  |
| 10 | OR2M1P   | nonsynonymous SNV | c.T175C  | p.C59R  | LAVMSYDCYIAICHPLRYTNLMRPK | LAVMSYDCYIAIRHPLRYTNLMRPK  |
| 10 | OR2T3    | nonsynonymous SNV | c.C344G  | p.A115G | GIQMFFYLTLAGAEVFLAAMAYDR  | GIQMFFYLTLAGGEVFLAAMAYDR   |
| 11 | OR5H14   | nonsynonymous SNV | c.C427T  | p.R143W | LYPAIMTNGLCIRLLLSYVGGLLH  | LYPAIMTNGLCIWLILLSYVGGLLH  |
| 11 | PBX3     | nonsynonymous SNV | c.G20A   | p.R7K   | MRGLSIRGAQEEDPPDPQLMRDNM  | MRGLSIKGAQEEDPPDPQL        |
| 11 | PBX3     | nonsynonymous SNV | c.G62A   | p.R21K  | LCEIKEKTGLSIRGAQEEDPPDPQL | LCEIKEKTGLSIKGAQEEDPPDPQL  |
| 11 | PCDHA10  | nonsynonymous SNV | c.T67C   | p.W23R  | QCLLLSLLLLAAWEVGSQGLHYSVY | QCLLLSLLLLAAREVGSQGLHYSVY  |
| 11 | PCMTD1   | nonsynonymous SNV | c.G418A  | p.E140K | EEDKHNEAMKEPPQNLLREKIMK   | EEDKHNEAMKEKPPQNLLREKIMK   |
| 11 | PGM2     | nonsynonymous SNV | c.T542G  | p.V181G | AVAEKQDSGEWRVFSGNELGALLGW | AVAEKQDSGEWRGFSGNELGALLGW  |
| 11 | PKD1     | nonsynonymous SNV | c.C841G  | p.H281D | FPASPGATLVGPHGPLASGQLAAFH | FPASPGATLVGPDGPLASGQLAAFH  |
| 11 | PLXND1   | nonsynonymous SNV | c.A958G  | p.M320V | AHYKIPEGASLAMLIDKKDNTLGR  | AHYKIPEGASLAVSLIDKKDNTLGR  |
| 11 | POTED    | nonsynonymous SNV | c.T278C  | p.M93T  | GTSGDHENSFMKMLRSKMGKWCCHC | GTSGDHENSFMKTLRSKMGKWCCHC  |
| 11 | PPP2CB   | nonsynonymous SNV | c.G95A   | p.C32Y  | CKQLNENQVRTLCEKAKEILTKESN | CKQLNENQVRTLYEKAKEILTKESN  |
| 11 | PPP2CB   | nonsynonymous SNV | c.G43C   | p.E15Q  | DKAFTKELDQWVEQLNECKQLNENQ | DKAFTKELDQWVQQLNECKQLNENQ  |
| 11 | PRAMEF20 | nonsynonymous SNV | c.T206G  | p.L69R  | QAWPFLRPLGSLMKRPCPETFQAV  | QAWPFLRPLGSRMKRPCPETFQAV   |
| 12 | PRB1     | nonsynonymous SNV | c.G446A  | p.R149Q | KPQGPPPPQGDKSRSPRPPGKPPQP | KPQGPPPPQGDKSQSPRPPGKPPQP  |
| 12 | PROS1    | nonsynonymous SNV | c.T848C  | p.F283S | EAVMDINKPGPLFKPENGLLETKVY | EAVMDINKPGPLSKPENGLLETKVY  |
| 12 | PTDSS2   | nonsynonymous SNV | c.G28A   | p.G10R  | MRRGERRDAGGPRPESVPAGRASL  | MRRGERRDARGPRPESVPAGR      |
| 12 | PWWP2B   | nonsynonymous SNV | c.G298C  | p.E100Q | ARGVQPPETTRPEPPPLVPLPAG   | ARGVQPPETTRQPPPLVPLPAG     |
| 12 | RAB4B    | nonsynonymous SNV | c.G295T  | p.V99L  | IWDTAGQERFRSVTRSYYGAAGAL  | IWDTAGQERFRLTRSYYGAAGAL    |

|    |          |                   |           |          |                             |                             |
|----|----------|-------------------|-----------|----------|-----------------------------|-----------------------------|
| 12 | RBMS1    | nonsynonymous SNV | c.T563A   | p.M188K  | SSGTSRGGVGFARMESTEKCEAVIGH  | SSGTSRGGVGFARKESTEKCEAVIGH  |
| 12 | RBMXL1   | nonsynonymous SNV | c.T596C   | p.L199P  | RDSYGGPPRREPLSRRDVYLSPRD    | RDSYGGPPRREPPSRRDVYLSPRD    |
| 12 | RFPL4A   | nonsynonymous SNV | c.G409A   | p.A137T  | QNRKEQAERFDTALCVLGTFRFTSG   | QNRKEQAERFDTTLCVLGTFRFTSG   |
| 12 | RNF187   | nonsynonymous SNV | c.G73T    | p.A25S   | ALCQRAPREPVRADCGHRFCRACVV   | ALCQRAPREPVRSDCGHRFCRACVV   |
| 12 | RP9P     | nonsynonymous SNV | c.G64T    | p.G22W   | RGSRWIRNCSGPGSRSGGGTTPSSC   | RGSRWIRNCSGPWSRSGGGTTPSSC   |
| 12 | SH2D3C   | nonsynonymous SNV | c.G1270A  | p.A424T  | WGSTEHGVEVVLHLEAARTVAHHG    | WGSTEHGVEVVLTHLEAARTVAHHG   |
| 12 | SH3BP1   | nonsynonymous SNV | c.A1869C  | p.L623F  | GSSLRAPTVPPLPPTPPQARRQS     | GSSLRAPTVPFPPTPPQARRQS      |
| 13 | SHISA7   | nonsynonymous SNV | c.T14A    | p.L5Q    | MPALLLVLLASSAGQARARPSNAT    | MPALQLLVLLASSAGQA           |
| 13 | SLC25A5  | nonsynonymous SNV | c.G132T   | p.Q44H   | VKLLLVQVHASKQITADKQYKGIID   | VKLLLVQVHASKHITADKQYKGIID   |
| 13 | SLC35G5  | nonsynonymous SNV | c.G667T   | p.A223S  | RSLHFPSCLPTVAFLSGLVGLLGCV   | RSLHFPSCLPTVFLSGLVGLLGCV    |
| 13 | SLC9A6   | nonsynonymous SNV | c.C1309A  | p.L437I  | GSNFQHMMMFAGLRGAMAFALAIRD   | GSNFQHMMMFAGIRGAMAFALAIRD   |
| 13 | SNRNP70  | nonsynonymous SNV | c.G545C   | p.R182P  | DGRRVLVDVERGRTVKGWRPRRLGG   | DGRRVLVDVERGPTVKGWRPRRLGG   |
| 13 | SPATC1   | nonsynonymous SNV | c.A979C   | p.T327P  | EQVVPASVPTSPTTPTVTVLASAP    | EQVVPASVPTSPTTPTVTVLASAP    |
| 13 | SPPL2A   | nonsynonymous SNV | c.C58T    | p.L20F   | SPAGAALLWGFLQLTAAQEAILHA    | SPAGAALLWGFLFQLTAAQEAILHA   |
| 13 | STAT5A   | nonsynonymous SNV | c.T8A     | p.F3Y    | MKFKAEVQSNRGLTKENLVFLAQKL   | MKYKAEVQSNRGLTK             |
| 13 | STAT5A   | nonsynonymous SNV | c.T1454A  | p.F485Y  | LWPQLCEALNMKFKAEVQSNRGLTK   | LWPQLCEALNMKYKAEVQSNRGLTK   |
| 13 | STMN1    | nonsynonymous SNV | c.A122T   | p.K41M   | KESVPEFPLSPPKKKDLSEEIQKK    | KESVPEFPLSPPMKKDLSEEIQKK    |
| 13 | TINCR    | nonsynonymous SNV | c.T313C   | p.F105L  | TLRGTSALAQDIFPATPLPKPCPLP   | TLRGTSALAQDILPATPLPKPCPLP   |
| 13 | TMEM184A | nonsynonymous SNV | c.C250T   | p.P84S   | HQIYLHLRSYTVPEQRYIIRLLLI    | HQIYLHLRSYTVSQEQRYIIRLLLI   |
| 14 | TMEM201  | nonsynonymous SNV | c.C71A    | p.A24E   | PTAGLAGGLGVTACAAAGVLLYRIA   | PTAGLAGGLGVTECAAAGVLLYRIA   |
| 14 | TPTE     | nonsynonymous SNV | c.G1237A  | p.D413N  | EKMTSSDVVAGSD               | EKMTSSDVVAGSN               |
| 14 | TRIM28   | nonsynonymous SNV | c.C59G    | p.P20R   | ASAAAASAASGSPGPEGSAGGEKR    | ASAAAASAASGRGPEGSAGGEKR     |
| 14 | UGT2B4   | nonsynonymous SNV | c.G1075A  | p.G359R  | LTWFQYHSLDVTGFLACVATVIFI    | LTWFQYHSLDVTRFLLACVATVIFI   |
| 14 | UGT2B4   | nonsynonymous SNV | c.C622T   | p.P208S  | PQKVLWRFDGNKPDTLGLNTRLYKW   | PQKVLWRFDGNKSDTLGLNTRLYKW   |
| 14 | UPF3A    | nonsynonymous SNV | c.C282A   | p.H94Q   | EQLEEQLRPLPAHDYFEFFAADLSL   | EQLEEQLRPLPAQDYFEFFAADLSL   |
| 14 | USP1     | nonsynonymous SNV | c.C599T   | p.A200V  | LNPMYEGYLQHDVQEVLCILGNIQ    | LNPMYEGYLQHDVQEVLCILGNIQ    |
| 14 | VPS13C   | nonsynonymous SNV | c.G10237T | p.A3413S | PFQGA VQGPEEF AEGLVIGVRSFLG | PFQGA VQGPEEF SEGLVIGVRSFLG |
| 14 | WDR13    | nonsynonymous SNV | c.T13C    | p.W5R    | MAAVWQVLAVDARYNAYRTPTFPQ    | MAAVRQVLAVDARYNA            |

|    |                     |                   |                                           |                                          |                                         |                                     |
|----|---------------------|-------------------|-------------------------------------------|------------------------------------------|-----------------------------------------|-------------------------------------|
| 14 | WDR24               | nonsynonymous SNV | c.G2207A                                  | p.C736Y                                  | RPMSRGGWVCDRCHRCASMCVCHH                | RPMSRGGWVCDRYHRCASMCVCHH            |
| 14 | X97876              | nonsynonymous SNV | c.A632G                                   | p.Y211C                                  | CKSRKEQKETTFTVMRLAATDLLF                | CKSRKEQKETTFTVMRLAATDLLF            |
| 14 | XYLT1               | nonsynonymous SNV | c.C190T                                   | p.R64C                                   | GGGEQPPAPAPRRERRDLPAEPAA                | GGGEQPPAPAPCRERRDLPAEPAA            |
| 15 | ZBTB47              | nonsynonymous SNV | c.A1076G                                  | p.Q359R                                  | EEEEEGEAGGKQGPRGSRSSRADP                | EEEEEGEAGGKRGPGRSSRADP              |
| 15 | ZCCHC6              | nonsynonymous SNV | c.C304T                                   | p.P102S                                  | KVFTKIYKGEKKPEIFVDGWNIYFF               | KVFTKIYKGEKKSEIFVDGWNIYFF           |
| 15 | ZCCHC6              | nonsynonymous SNV | c.C3604T                                  | p.P1202S                                 | PVLQEIYKGEKKPEIFVDGWNIYFF               | PVLQEIYKGEKKSEIFVDGWNIYFF           |
| 15 | ZMIZ1               | nonsynonymous SNV | c.T251C                                   | p.M84T                                   | PQLSHPPDMPNNMAALEKPLSHPMQ               | PQLSHPPDMPNNTAALEKPLSHPMQ           |
| 15 | ZNF273              | nonsynonymous SNV | c.A1383C                                  | p.E461D                                  | KIIHTGAKPYKCEECGSAFRAFSTL               | KIIHTGAKPYKCEECGSAFRAFSTL           |
| 15 | ZNF429              | nonsynonymous SNV | c.C1634A                                  | p.A545D                                  | GEKPYKCEECGKAFNRSSRLTQHKK               | GEKPYKCEECGKDFNRSSRLTQHKK           |
| 15 | ZNF717              | nonsynonymous SNV | c.G1588A                                  | p.A530T                                  | CKSFLTVHQRTHAGEKPYACNECGK               | CKSFLTVHQRTHTGEKPYACNECGK           |
| 15 | ZNF721              | nonsynonymous SNV | c.T503A                                   | p.L168H                                  | EECGKAFNRSTNLTAHKRIHNREKA               | EECGKAFNRSTNHTAHKRIHNREKA           |
| 15 | ZNF737              | nonsynonymous SNV | c.C1157G                                  | p.T386R                                  | CGKAFNWSSHLTTHKRIHTGEKPYK               | CGKAFNWSSHLTRHKRIHTGEKPYK           |
| 15 | ZNF93               | nonsynonymous SNV | c.A995G                                   | p.K332R                                  | KAFKYSRILTTHKRIHTGEKPYKCN               | KAFKYSRILTTHRIHTGEKPYKCN            |
| 15 | ZNF99               | nonsynonymous SNV | c.A2348G                                  | p.H783R                                  | KHFSALRKHKIIHTGKKPYKCEECG               | KHFSALRKHKIIRTGKKPYKCEECG           |
| 15 | MUC2                | nonsynonymous SNV | c.T4373C                                  | p.I1458T                                 | TTPPPTTTPSPPISTTTTTPPTTTP               | TTPPPTTTPSPPTSTTTTTPPTTTP           |
| 16 | MUC2                | nonsynonymous SNV | c.C4463T<br>c.C4472T<br>c.C4483T          | p.T1488I p.T1491I<br>p.P1495S            | TPSPPTTTPSPPTTTTTTTPPTTTPSP             | TPSPPTTTPSPPTITTTTPSPTTTPSP         |
| 16 | MUC4                | nonsynonymous SNV | c.A8317G<br>c.T8330C                      | p.N2773D<br>p.V2777A                     | ASTGHATPLPVTNTSSVSTGHATPLHVTS           | ASTGHATPLPVDTSASTGHATPLHVTS         |
| 16 | PLEC                | nonsynonymous SNV | c.A13646C                                 | p.Y4549S                                 | GSGFSMTFSSSSSSSGYGRRYASG                | GSGFSMTFSSSSSSSGYGRRYASG            |
| 16 | ADAMTS7             | nonsynonymous SNV | c.T3875C<br>c.T3878C                      | p.L1292P p.L1293P                        | DSELWPTVGVASLLPPIAPLPEMKV               | DSELWPTVGVASPPPIAPLPEMKV            |
| 16 | CLIC6               | nonsynonymous SNV | c.G775A<br>c.T791A<br>c.A805G             | p.G259S p.V264D<br>p.S269G               | GDSVEAGDPAGDGVEAGVPAGDSVEAEG<br>PAGDSMD | GDSVEAGDPAGDSVEAGDPAGDGVEAEGPAGDSMD |
| 16 | DSCAML1             | nonsynonymous SNV | c.G6145C<br>c.A6151C                      | p.G2049R<br>p.T2051P                     | PAPPAGTAPPAPGPTPAEPTAPSAAP              | PAPPAGTAPPAPRPPPAEPTAPSAAP          |
| 16 | ENSG0000<br>0163046 | nonsynonymous SNV | c.C533T c.G553C                           | p.A178V p.E185Q                          | VKNKAGHTPLLLAIRKRSEIIVEFLTKNA<br>NA     | VKNKAGHTPLLLVIRKRSEIIVEFLTKNANA     |
| 16 | KRT18               | nonsynonymous SNV | c.G76A c.C79T<br>c.C83A c.G94T<br>c.C102A | p.A26T p.R27W<br>p.P28Q p.A32S<br>p.S34R | RSLGVSQAPSYGARPVSSAASVYAGAGGS<br>GS     | RSLGVSQAPSYGTWQVSSARVYAGAGGSGS      |
| 16 | LINC00273           | nonsynonymous SNV | c.G257A                                   | p.R86Q                                   | ARDRRPLGRGRRGAAQTFGQTRGGPRCP<br>GSHR    | ARDRRPLGRGRRRAAFTFGQTRGGPRCPGSHR    |
| 16 | RBMX                | nonsynonymous SNV | c.G356T c.C382G                           | p.G119V p.P128A                          | PLPVKRGPPRSGGPPPKRSAPSGPVRSSSG<br>MGG   | PLPVKRGPPRSGVPPPKRSAASGPVRSSSGMGG   |

|    |               |                            |                                               |                                    |                                                          |                                                                              |
|----|---------------|----------------------------|-----------------------------------------------|------------------------------------|----------------------------------------------------------|------------------------------------------------------------------------------|
| 17 | X97876        | nonsynonymous SNV          | c.C433G c.T434C<br>c.C490A c.G464A<br>c.A406G | p.L145A p.P164T<br>p.R155H p.M136V | RGSNALQVVISLMVALSLFCHLQTLCTP<br>GLRTTSHCHVNPFPQCVLGLLEPN | RGSNALQVVISLVVALSLFCHAQTQLCTPGLHTTSHCHVNTF<br>PGQCVLGLLEPN                   |
| 17 | OVGP1         | nonframeshift<br>insertion | c.543_544insACT<br>GGACAGAAGA<br>CCCTGACC     | p.P182delinsTGQK<br>TLTP           | KTLTPVGHQSVTPVSHQSVSPGGTT                                | KTLTPVGHQSVTTGQKTLTPVSHQSVSPGGTT                                             |
| 17 | MAFA          | nonframeshift<br>insertion | c.603_604insGCC<br>GCCAC                      | p.H202delinsAAH<br>H               | HAAHHHHAHHHHHHHHHHGGAGHG                                 | HAAHHHHAHHHHAHHHHHHHHGGAGHG                                                  |
| 17 | ZC3H3         | nonframeshift<br>insertion | c.2639_2640insC<br>AA                         | p.S880delinsSK                     | SSSKASSSSSSSSPPASLDHEAPS                                 | SSSKASSSSSSSSKPPASLDHEAPS                                                    |
| 17 | GOLGA6B       | nonframeshift deletion     | c.1528_1530del                                | p.510_510del                       | PGEGDGGQHLDSSEEEAPRPTNIP                                 | PGEGDGGQHLDSSEEEAPRPTNIPE                                                    |
| 17 | AGAP6         | frameshift insertion       | c.54dupC                                      | p.D18fs                            | TCRVHPSVSLFEDQQQGSVCPSESE                                | TCRVHPSVSLFEDPAAGVGVSL                                                       |
| 17 | PTPN4         | frameshift insertion       | c.549dupT                                     | p.N183fs                           | SRVAPGTPVSYLNVSNKSCFQEYVL                                | SRVAPGTPVSYLNCFK                                                             |
| 17 | CYP4F3IP      | frameshift insertion       | c.345dupT                                     | p.P115fs                           | LIVWWLPFVAVSPCLF                                         | LIVWWLPFVAVSPLFVL                                                            |
| 17 | ZNF717        | frameshift insertion       | c.397_398insAA                                | p.T133fs                           | NTSTQERVELGKTFNLNSNHVLNLI                                | NTSTQERVELGKKHLI                                                             |
| 18 | DQ580909      | frameshift insertion       | c.744dupC                                     | p.H248fs                           | QALHLLPAPARLHPMVSLPKEERRE                                | QALHLLPAPARLHPDGLPAQGGEKRKDAPRWWTSAATTLTSL<br>LLLPCVFHDLEVVGNPRLKTRGEFRLQDDM |
| 18 | X97876        | frameshift insertion       | c.633_634insTC                                | p.Y211fs                           | CKSRKEQKETTFFYTMRLAATDLLF                                | CKSRKEQKETTFFYSQLCGWLPPTCCSLCW                                               |
| 18 | HDAC1         | frameshift deletion        | c.36delT                                      | p.C12fs                            | MAQTQGTRRKVCYYYDGDVGNYYY                                 | MAQTQGTRRKVCTTTTGMLEITIMDKATQS                                               |
| 18 | LOC39975<br>3 | frameshift deletion        | c.1731delC                                    | p.N577fs                           | ILLLAHGSREEVNETCGEGDGCTAL                                | ILLLAHGSREEVKRPVGRETAARHSIWAARGMWSWSSS                                       |
| 18 | SMAD6         | frameshift deletion        | c.336delC                                     | p.G112fs                           | AGSSLLDVAEPGGPGWLPESDCETV                                | AGSSLLDVAEPGRAGCPRTARR                                                       |
| 18 | BC033456      | frameshift deletion        | c.156delT                                     | p.F52fs                            | PEYSRFSLLFFFFPQHLNSQLPRLS                                | PEYSRFSLLFFFFPSTLTLSFPDFLQ                                                   |
| 18 | ABHD17A       | frameshift deletion        | c.635delC                                     | p.S212fs                           | ASRYECAAVVLHSPPLTSGMRVAFPD                               | ASRYECAAVVLHCRSPRACASPSPTPRRPTASTPSLTSRRCP<br>SRLPCSSSTARTR                  |
| 19 | ABHD17A       | frameshift deletion        | c.635delC                                     | p.S212fs                           | ASRYECAAVVLHSPPLTSGMRVAFPD                               | ASRYECAAVVLHCRSPRACASPSPTPRRPTASTPSLSS                                       |
| 19 | ABHD17A       | frameshift deletion        | c.541delC                                     | p.R181fs                           | PRATSVPRWCCTRRSPRACASPSPT                                | PRATSVPRWCCTAAHLGHARRLPRHQEDLLRRLP                                           |
| 19 | RUNX1-<br>IT1 | frameshift deletion        | c.186_187del                                  | p.62_63del                         | LSGEIKVLSLSLYLTHTHTHTH                                   | LSGEIKVLSLSLSHTHTHTHTHTHREEREREREREREASIQ<br>NSHA                            |
| 19 | HGC6.3        | frameshift deletion        | c.499_502del                                  | p.167_168del                       | GNDPHCLLLPHTLQGE                                         | GNDPHCLLLPHTCRGSS                                                            |
| 19 | ADAMTSL<br>1  | frameshift deletion        | c.30delC                                      | p.F10fs                            | MSGVFCFFFFLGVPEAEVTWF                                    | MSGVFCFFFFSS                                                                 |
| 19 | ARID1A        | nonsynonymous SNV          | c.G107T                                       | p.G36V                             | LKKAQQQREEAGGEAAAAAAAAAERG                               | LKKAQQQREEAVGEAAAAAAAAAERG                                                   |
| 19 | CAPNS1        | nonsynonymous SNV          | c.C15A                                        | p.N5K                              | MFLVNSFLKGGGGGGGGGLGGGL                                  | MFLVKSFLKGGGGGGGG                                                            |
| 19 | EPHA8         | nonsynonymous SNV          | c.G2756A                                      | p.S919N                            | TVSRCPPPAFVRSCFDLRGGSGGGG                                | TVSRCPPPAFVRNCFDLRGGSGGGG                                                    |
| 19 | GRIK5         | nonsynonymous SNV          | c.C4T                                         | p.P2S                              | MPAELLLLLIVAFASPCQVLSLR                                  | MSAELLLLLIVAF                                                                |
